# Supplementary material for: Mechanically accelerated catalytic hydrogenation: correlating physical state, reaction rate, and interface area
Source: Royal Society of Chemistry journal article supplement (doi:10.1039/d3gc03783e), 2023-12-14

**Supporting Information for**

**Mechanically Accelerated Catalytic Hydrogenation:  
Correlating Physical State, Reaction Rate, And Interface  
Area**

**Federico Cuccu, Francesco Basoccu, Claudia Fattuoni, Andrea Porcheddu**

Number of pages: 80

Number of figures: 4

Number of schemes: 3

Number of tables: 1

# Contents

|                                                                                           |    |
|-------------------------------------------------------------------------------------------|----|
| <b>1. General information</b>                                                             | 3  |
| <b>2. List of reagents</b>                                                                | 4  |
| <b>3. Pressure calculation</b>                                                            | 5  |
| <b>4. Optimization for the carbonyl reduction and reaction mechanism</b>                  | 7  |
| <b>5. Synthetic procedures</b>                                                            | 8  |
| 5.1. Synthesis of 2,2'-Bi(1,3,6,2-dioxazaborocane) (Compound 1)                           | 8  |
| 5.2. General procedure for the synthesis of primary and secondary alcohols                | 9  |
| 5.3. General procedure for the synthesis of alkenes, alkanes and amines                   | 9  |
| <b>6. SEM images and general considerations</b>                                           | 12 |
| <b>7. Characterization data of products</b>                                               | 14 |
| <b>8. References</b>                                                                      | 29 |
| <b>9. Green metrics calculations</b>                                                      | 30 |
| 9.1. Calculation of the Green Chemistry Metrics for the Mechanochemical Preparation of 8f | 30 |
| 9.2. The Eco-scale Score for the Mechanochemical Preparation of 8f                        | 31 |
| 9.3. Calculation of the Green Chemistry Metrics for the In-solution Preparation of 8f     | 32 |
| 9.4. The Eco-scale Score for the in-solution preparation of 8f                            | 33 |
| <b>10. Spectra</b>                                                                        | 34 |

## 1. General information

Commercially available reagents were purchased from Acros, Aldrich, Strem Chemicals, Alfa-Aesar, TCI Europe and used as received. All reactions were monitored by thin-layer chromatography (TLC) performed on glass-backed silica gel 60 F254, 0.2 mm plates (Merck), and compounds were visualized under UV light (254 nm) or using cerium ammonium molybdate solution with subsequent heating. The eluents were technical grade. Mechanochemical reactions were carried out using a MM 500 Vario ball mill apparatus. The reagents were milled using a Stainless Steel (SUS 304) and Zirconia screw capped grinding jar (10 mL and 5 mL) equipped with balls ( $\phi$  = 8 mm) of the same material, or with Ertalyte® SmartSnap jars equipped with ZrO<sub>2</sub> balls ( $\phi$  = 8 mm). Precisely, the zirconium oxide of the vessels and balls used for all reactions accomplished in the mixer mill is yttrium oxide stabilized (ZrO<sub>2</sub>-Y). These parameters were applied if not stated otherwise. <sup>1</sup>H and <sup>13</sup>C liquid NMR spectra were recorded on a Bruker Avance III HD 600 MHz NMR spectrometer at 298 K and were calibrated using trimethylsilyl silane (TMS). Proton chemical shifts are expressed in parts per million (ppm,  $\delta$  scale) and are referred to the residual hydrogen in the solvent (CHCl<sub>3</sub>, 7.27 ppm or DMSO 2.54 ppm). Data are represented as follows: chemical shift, multiplicity (s = singlet, d = doublet, t = triplet, q = quartet, m = multiplet and/or multiple resonances, br s = broad singlet, and combination of thereof), coupling constant (*J*) in Hertz (Hz) and integration. Carbon chemical shifts are expressed in parts per million (ppm,  $\delta$  scale) and are referenced to the carbon resonances of the NMR solvent (CDCl<sub>3</sub>,  $\delta$  77.0 ppm or  $\delta$  DMSO-d<sub>6</sub>  $\delta$  39.5 ppm). Deuterated NMR solvents were obtained from Aldrich and TCI. Samples were analysed using an Agilent 5977B MS interfaced to the GC 7890B equipped with a DB-5ms column (J & W), injector temperature at 230 °C, detector temperature at 280 °C, helium carrier gas flow rate of 1 ml/min. The GC oven temperature program was 60°C initial temperature with 4 min hold time and ramping at 15°C/min to a final temperature of 270°C with 7 min hold time. 1  $\mu$ L of each sample was injected in split (1:20) mode. After a solvent delay of 3 minutes mass spectra were acquired in full scan mode using 2.28 scans/s with a mass range of 50–500 Amu. Retention times of different compounds were determined by injecting pure compound under identical conditions. All the experiments were carried out in duplicate to ensure reproducibility of the experimental data. Yields refer to pure isolated materials, if not otherwise stated.

## 2. List of reagents

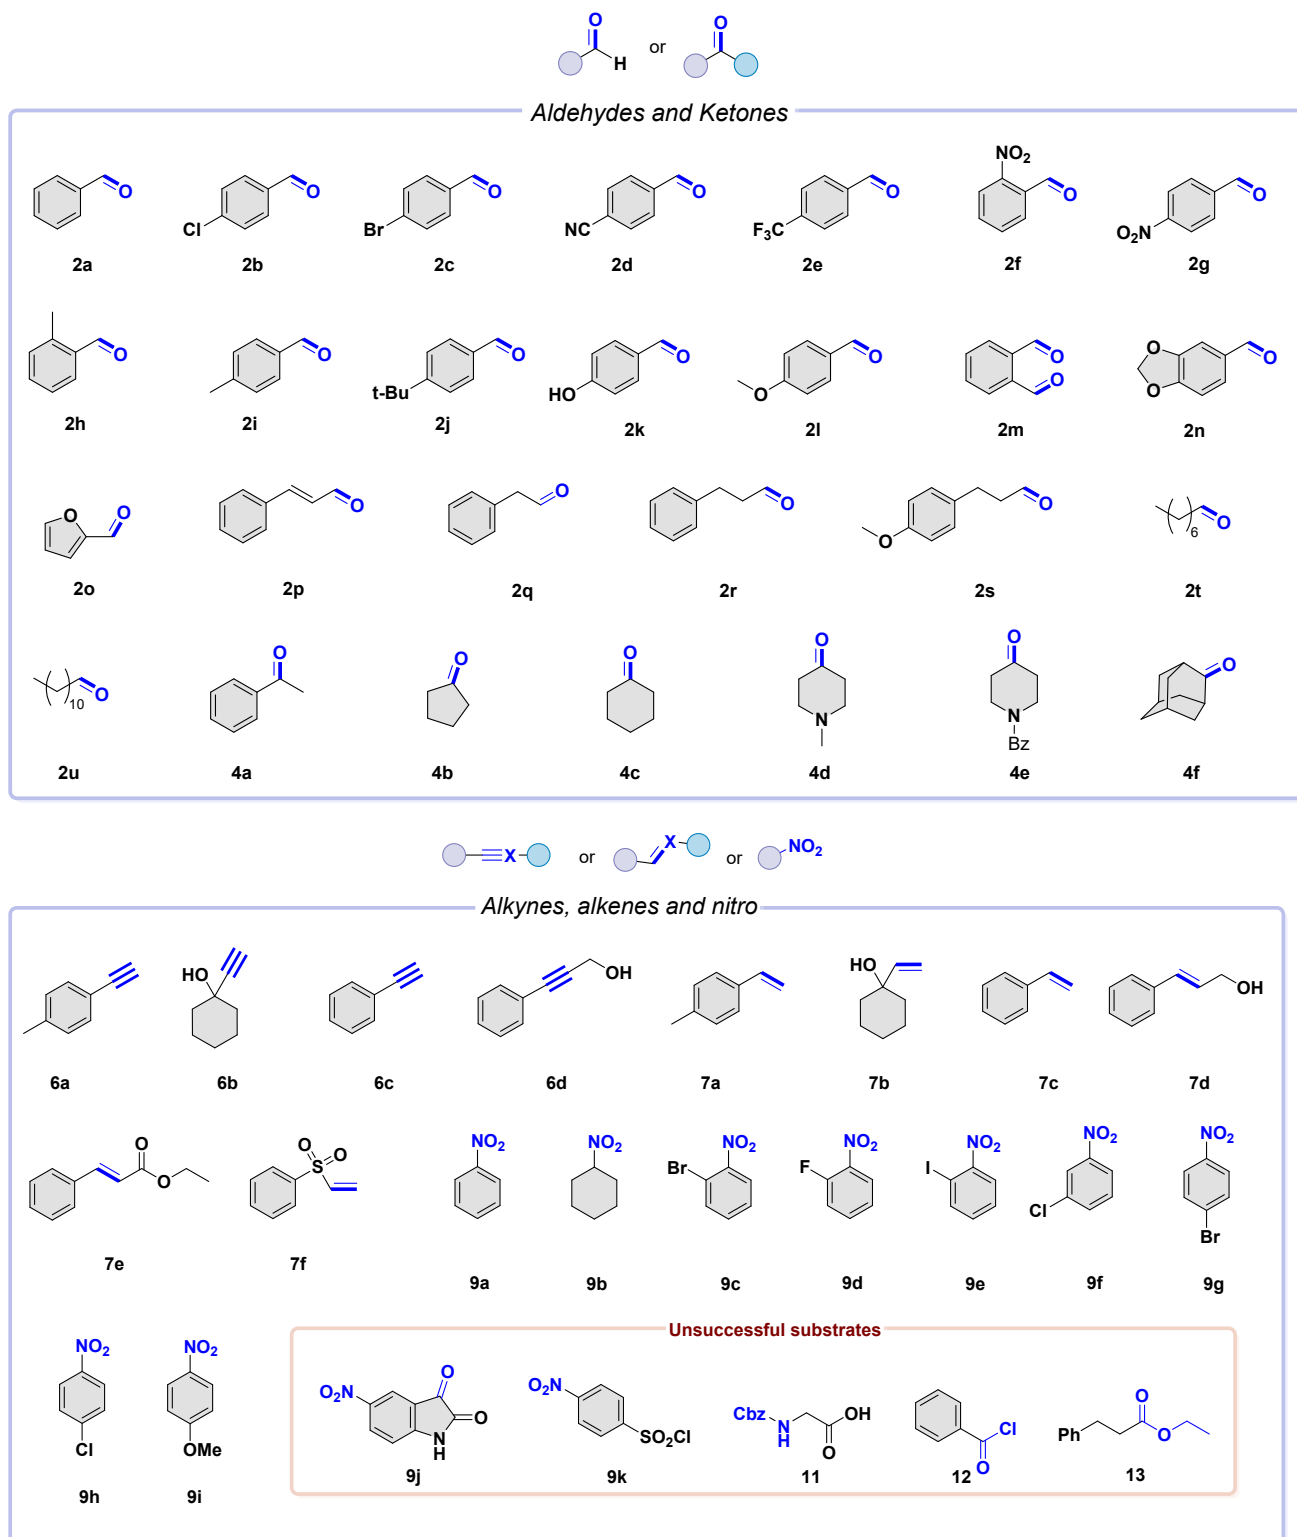

**Figure S1.** The list of all the substrates used for generating the scope and limitations of this work.

### 3. Pressure calculation

We considered the following equation for calculating an approximate value of hydrogen pressure inside our vessels under different conditions:

$$P = \frac{(n \cdot R \cdot T)}{V}$$

Where P is the pressure (atm) of the system,  $n$  is the number of moles of  $H_2$ , R is the gas constant [(l · atm) / (mol · K)], T is the temperature (K) and V is the volume (L).

#### Calculation of the $H_2$ pressure (1 mmol scale, scope)

Considering the volume of the jar (10 mL = 0.01 L), and subtract the volume occupied by an 8 mm ball (267,95 mm<sup>3</sup> = 0,00026795 L). We neglected the volume of the reagent.

We then have a total volume of **0,00973205 L**.

The number of moles of  $H_2$  is stoichiometric with the number of moles of diboron compound **1** and water (2 mmol = **0.002 mol**).

The overall temperature has been approximated to ambient temperature (25 °C = **298 K**).

The gas constant is **0,0821 · [(l · atm) / (mol · K)]**

$$P = \frac{(0.002 \text{ mol} \cdot 0,0821 \cdot [(l \cdot \text{atm}) / (\text{mol} \cdot K)] \cdot 298 \text{ K})}{0,00973205 \text{ L}} = \mathbf{5.02 \text{ atm}}$$

#### Calculation of the $H_2$ pressure (0.3 mmol scale, kinetics)

Considering the volume of the jar (5 mL = 0.005 L), and subtract the volume occupied by an 8 mm ball (267,95 mm<sup>3</sup> = 0,00026795 L). We neglected the volume of the reagent.

We then have a total volume of **0,00473205 L**.

The number of moles of  $H_2$  is stoichiometric with the number of moles of diboron compound **1** and water (0.6 mmol = **0.0006 mol**).

The overall temperature has been approximated to ambient temperature (25 °C = **298 K**).

The gas constant is **0,0821 · [(l · atm) / (mol · K)]**

$$P = \frac{(0.0006 \text{ mol} \cdot 0,0821 \cdot [(l \cdot \text{atm}) / (\text{mol} \cdot K)] \cdot 298 \text{ K})}{0,00473205 \text{ L}} = \mathbf{3,10 \text{ atm}}$$

Calculation of the  $H_2$  pressure (20 mmol scale, scale-up)

Considering the volume of the jar (50 mL = 0.05 L), and subtract the volume occupied by a 10 mm ball (523,60 mm<sup>3</sup> = 0,00052360 L). We neglected the volume of the reagent.

We then have a total volume of **0,0494764 L**.

The number of moles of  $H_2$  is stoichiometric with the number of moles of diboron compound **1** and water (20 mmol = **0.02 mol**).

The overall temperature has been approximated to ambient temperature (25 °C = **298 K**).

The gas constant is **0,0821 · [(l · atm) / (mol · K)]**

$$P = \frac{(0.02 \text{ mol} \cdot 0,0821 \cdot [(l \cdot atm) / (mol \cdot K)] \cdot 298 K)}{0,0494764 \text{ L}} = \mathbf{9,89 \text{ atm}}$$

## 4. Optimization for the carbonyl reduction and reaction mechanism

**Table S1.** Table for the optimization of the carbonyl reduction

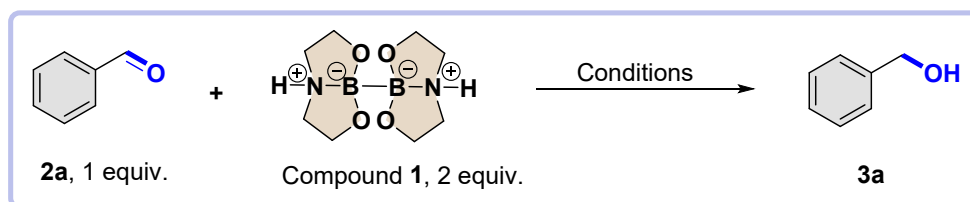

| Entry          | Time   | Frequency | Material              | Balls                 | Yield <sup>c</sup> |
|----------------|--------|-----------|-----------------------|-----------------------|--------------------|
| 1              | 90 min | 30 Hz     | SS                    | 1 (8 mm)              | 98%                |
| 2              | 90 min | 25 Hz     | SS                    | 1 (8 mm)              | 76%                |
| 3              | 90 min | 30 Hz     | ZrO <sub>2</sub>      | 1 (8 mm)              | 96%                |
| 4              | 90 min | 30 Hz     | Ertalyte <sup>®</sup> | 1 (8 mm) <sup>a</sup> | 97%                |
| 5              | 90 min | 30 Hz     | SS                    | 1 (2 mm)              | 23%                |
| 6              | 90 min | 30 Hz     | SS                    | -                     | 8%                 |
| 7 <sup>b</sup> | 90 min | 30 Hz     | SS                    | 1 (8 mm)              | 95%                |

*Reaction conditions:* benzaldehyde **2a** (1 mmol), diboron compound **1** (2 mmol) and H<sub>2</sub>O (2 mmol) were placed inside the vessel (10 mL volume) and the milling process was started. <sup>a</sup> ZrO<sub>2</sub> ball. <sup>b</sup> D<sub>2</sub>O in place of H<sub>2</sub>O. <sup>c</sup> Yields refers to GC-MS analysis.

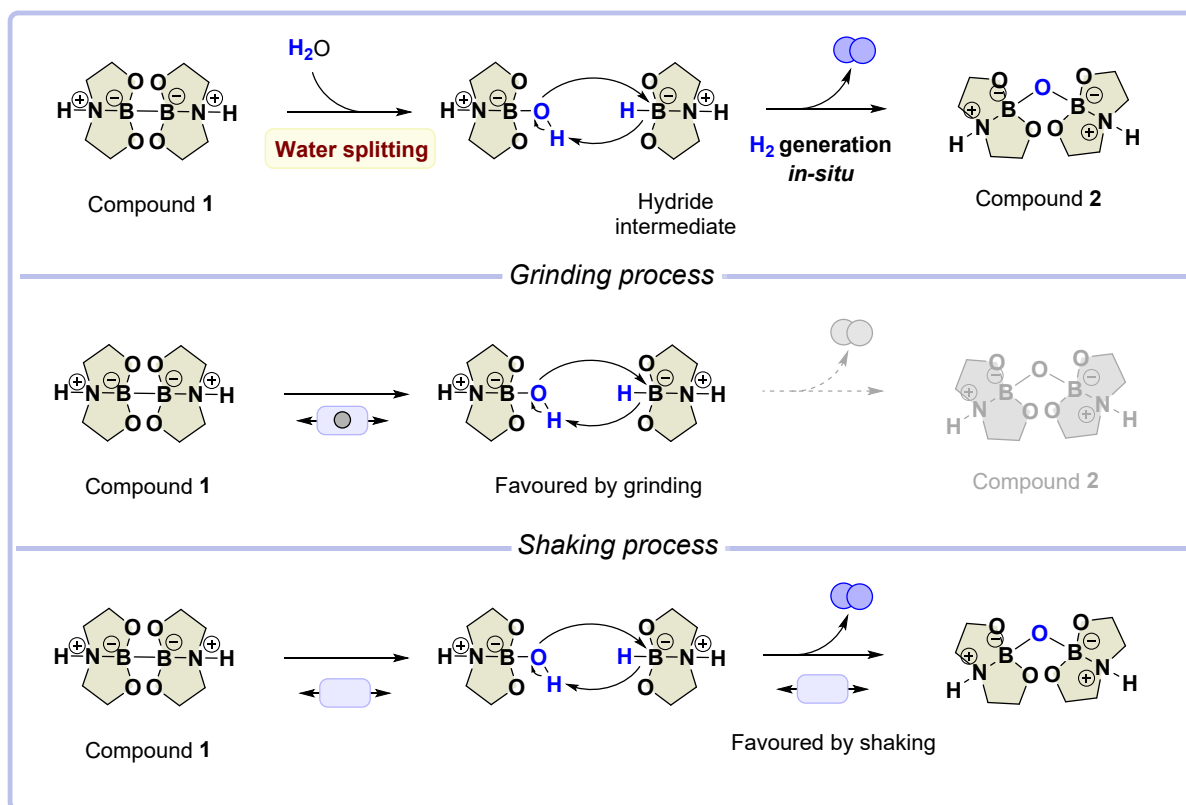

**Scheme S1.** Proposed reaction mechanism for the water splitting process mediated by the diboron compound **1**. The mechanism is supported by the hydrogen generation (detected by GC-MS) and by the crystallographic data showing the generated compound **2**.

## 5. Synthetic procedures

### 5.1. Synthesis of 2,2'-Bi(1,3,6,2-dioxazaborocane) (Compound 1)

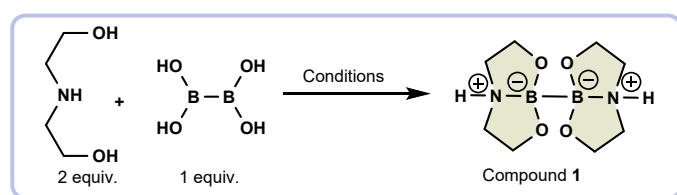

A 10 mL SS jar equipped with one SS milling ball (8 mm  $\phi$ , mass<sub>tot</sub> 2.09 g) was filled with tetrahydroxydiboron (1 mmol) and diethanolamine (2 mmol). The vessel was then closed, and the reaction was conducted for 20 min at a frequency of 30 Hz. At the end of the reaction, the mixture was rinsed in EtOAc (10 mL), and the solvent was removed with a Pasteur pipette. Lastly, the pure compound **1** was concentrated under reduced pressure (in the case of one pot synthesis, the solid was let to evaporate under the fume hood for around 20 min)

#### Compound 1 (2,2'-Bi(1,3,6,2-dioxazaborocane))

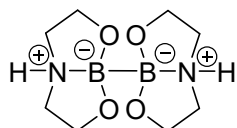

The title compound was synthesized according to the general procedure stated above. Tetrahydroxydiboron (89.7 mg, 1 mmol) and diethanolamine (192  $\mu$ L, 2 mmol) were used, to afford **1** as a white solid (193.7 mg, 0.85 mmol, 85%).

$^1\text{H}$  NMR (600 MHz,  $\text{CDCl}_3$ ):  $\delta$  = 3.85-3.83 (t,  $J$  = 6 Hz, 8H), 3.02-3.00 (t,  $J$  = 6 Hz, 8H).

$^{13}\text{C}$  NMR (151 MHz,  $\text{CDCl}_3$ ):  $\delta$  = 58.9, 49.5.

The spectroscopic data closely match the ones previously reported in the literature.<sup>1</sup>

## 5.2. General procedure for the synthesis of primary and secondary alcohols

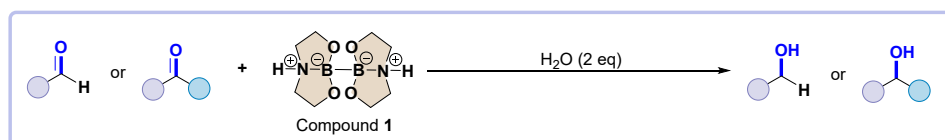

A 10 mL SS jar equipped with one SS milling ball (8 mm  $\phi$ ,  $\text{mass}_{\text{tot}}$  2.09 g) was filled with aldehyde **2a-u** or ketone **4a-f** (1 mmol), diboron compound **1** (2 mmol) and  $\text{H}_2\text{O}$  (2 mmol). The addition of 1 mmol of LiCl was required in the case of substrates **2q-u** and ketones **4a-f**. The vessel was then closed, and the reaction was conducted under ball milling conditions for 90 min at a frequency of 30 Hz. At the end of the reaction, the crude was recovered with EtOAc (10 mL) and filtered on paper. In few cases for ketones and aliphatic aldehydes, a short silica pad (1.0 g) was required for a further purification. Lastly, the solvent was removed under reduced pressure to afford the pure alcohols **3a-u** and **5a-f**.

### Carbonyl competition experiments

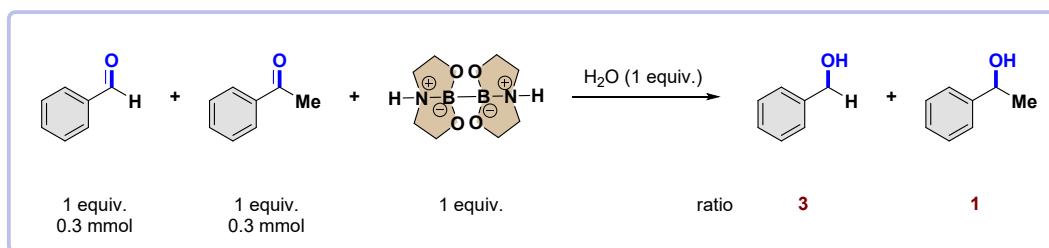

A 5 mL SS jar equipped with one SS milling ball (8 mm  $\phi$ , mass<sub>tot</sub> 2.09 g) was filled with aldehyde **2a** (1 mmol) and ketone **4a** (1 mmol), diboron compound **1** (1 mmol) and H<sub>2</sub>O (1 mmol). The vessel was then closed, and the reaction was conducted under ball milling conditions for 90 min at a frequency of 30 Hz. At the end of the reaction, the crude was recovered with EtOAc (10 mL) and filtered on paper. The crude was analysed *via* GC-MS.

### 5.3. General procedure for the synthesis of alkenes, alkanes and amines

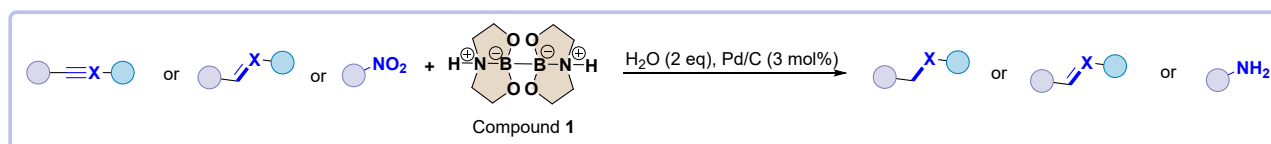

➤ A 10 mL SS jar equipped with one SS milling ball (8 mm  $\phi$ , mass<sub>tot</sub> 2.09 g) was filled with alkyne **6a-c** and **6g** (1 mmol), **1** (2 mmol), Pd/C (3 mol %) and H<sub>2</sub>O (2 mmol). The vessel was then closed, and the reaction was conducted for 90 min at a frequency of 30 Hz. At the end of the reaction, the crude was recovered with EtOAc (10 mL). In some cases, a short silica pad (1 g) was required for further purification. Lastly, the solvent was removed under reduced pressure to afford the pure alkane **8a-c** and **8g**.

➤ A 10 mL SS jar was filled with alkyne **7a-b**, **7d-f**, **8g**, and **11a** (1 mmol), **1** (2 mmol), Pd/C (3 mol %), and H<sub>2</sub>O (2 mmol). The vessel was then closed, and the reaction was conducted for 90 min at a frequency of 30 Hz *without any grinding ball*. At the end of the reaction, the crude was recovered with EtOAc (10 mL). Lastly, the solvent was removed under reduced pressure to afford the pure alkane **8a-b**, **8d-f**, **8h** and **11b**.

➤ A 10 mL SS jar equipped with one SS milling ball (8 mm  $\phi$ , mass<sub>tot</sub> 2.09 g) was filled with nitro compounds **9a-i** (1 mmol), **1** (3 mmol), Pd/C (3 mol %) and H<sub>2</sub>O (3 mmol). The vessel was then closed, and the reaction was conducted for 90 min at a frequency of 30 Hz. At the end of the reaction, the crude was recovered with EtOAc (10 mL). Lastly, the solvent was removed under reduced pressure to afford the pure alkane **10a-i**.

### Scale up experiments

A 50 mL SS jar equipped with one SS milling ball (10 mm  $\phi$ , mass<sub>tot</sub> 3.89 g) was filled with alkyne **6a** (10 mmol), **1** (20 mmol), Pd/C (3 mol %) and H<sub>2</sub>O (20 mmol). The vessel was then closed, and the reaction was conducted for 90 min at a frequency of 30 Hz. At the end of the reaction, the crude was recovered with EtOAc (10 mL). Lastly, the solvent was removed under reduced pressure to afford the pure alkane **8a** in 90% yield.

### Catalyst reuse experiments

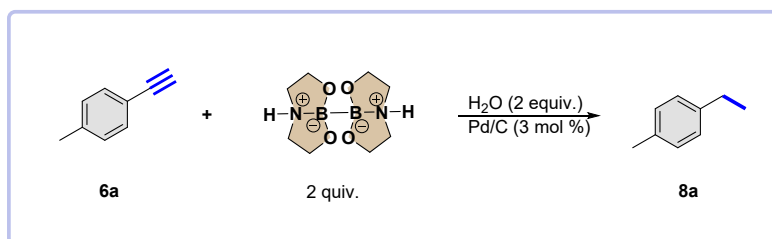

A 10 mL Erthalte<sup>®</sup> jar equipped with one  $\text{ZrO}_2$  milling ball (8 mm diameter) was filled with alkyne **6a** (1 mmol), **1** (2 mmol),  $\text{Pd/C}$  (3 mol %) and  $\text{H}_2\text{O}$  (2 mmol). The vessel was then closed and the mechanochemical reaction was conducted for 90 min at a frequency of 30 Hz. At the end of the reaction, the crude was recovered in EtOAc (10 mL) and analysed by GC-MS. Subsequently, once the jar was cleaned with ethyl acetate and the solvent was removed, the jar walls appeared covered by the catalyst (black coloured). The reaction was performed again adding new reagents except for the  $\text{Pd}$  catalyst. In the following plot are shown the results.

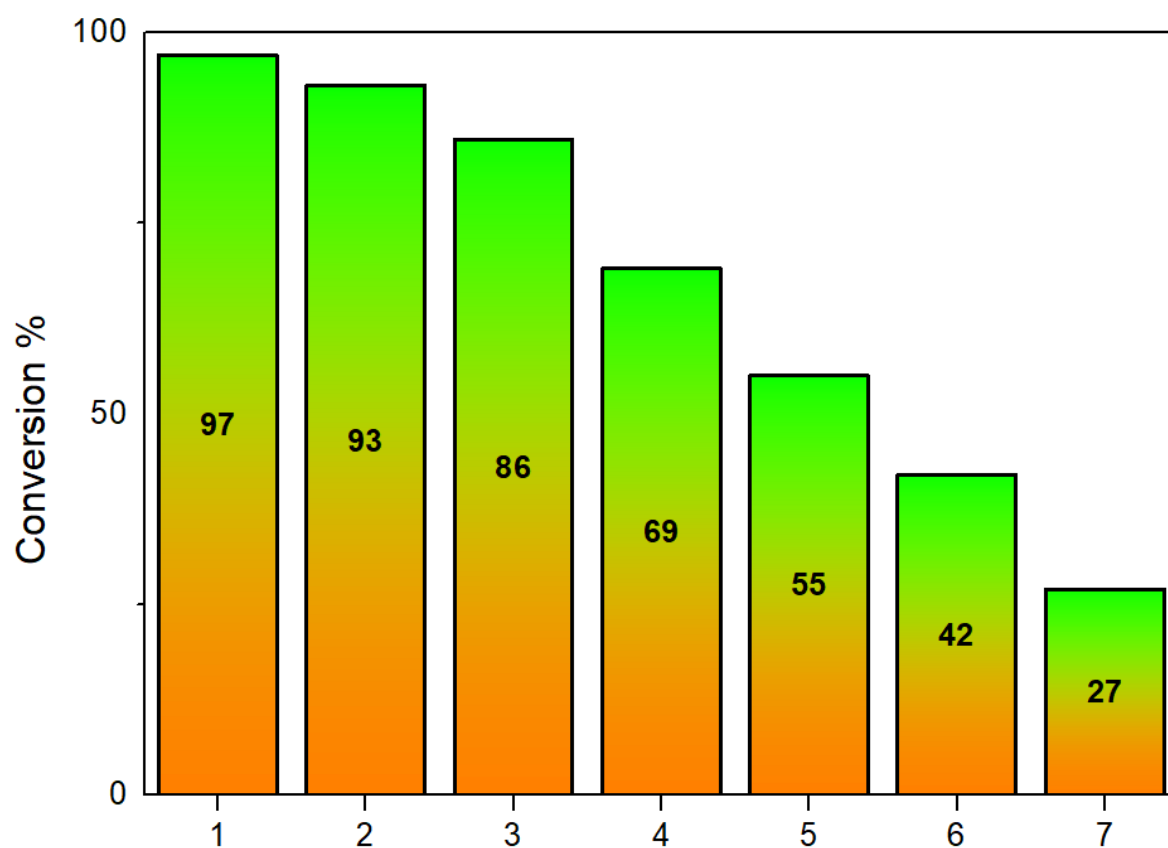

**Figure S2.** The reuse plot for the  $\text{Pd/C}$  incorporated in the Erthalte<sup>®</sup> jar.

## 6. SEM images and general considerations

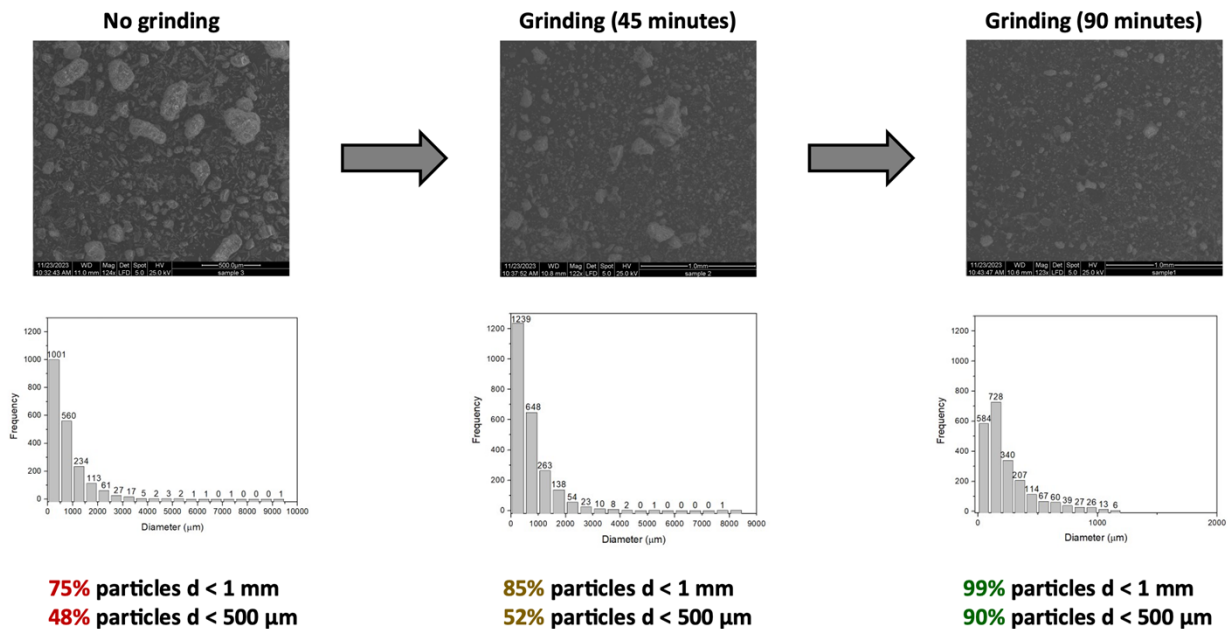

**Figure S3.** SEM images and size/particle distribution.

### General considerations

The images demonstrate a clear and systematic reduction in particle size achieved through grinding. Over a period of 90 minutes, the observable reduction in particle size progresses from a non-grinding state to complete diminution. The initial assessment reveals a consistent evolution in size distribution, particularly distinguished by particles with diameters below 500 μm. The discernible changes in the observed patterns highlight the evident average percentage of particles within this specified diameter range, reaching the maximum of 90% after 90 minutes of grinding. The image below shows the "erosion-like" effect, which is clearly evident in snapshots **b/b1** and eventually leads to a total reduction in the size of the particles (going from **a/a<sub>1</sub>** to **c/c<sub>1</sub>**).

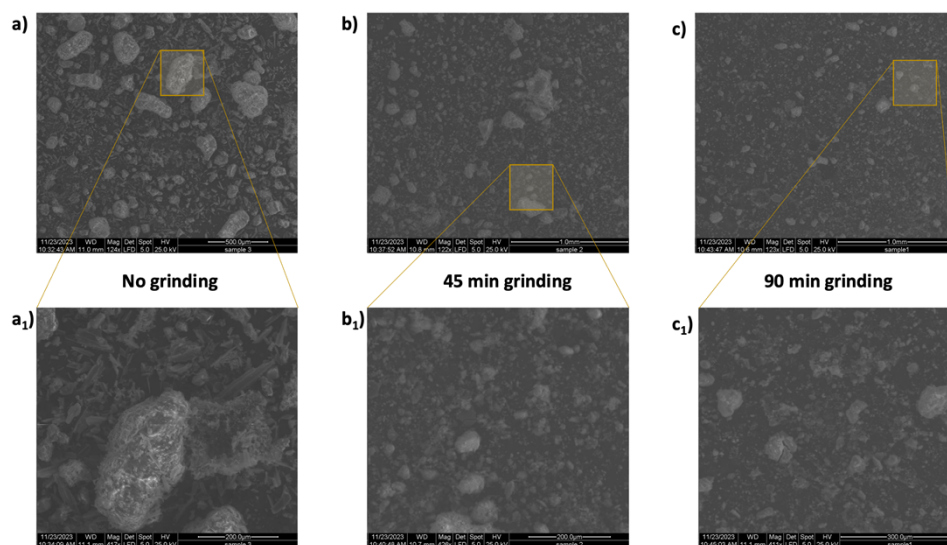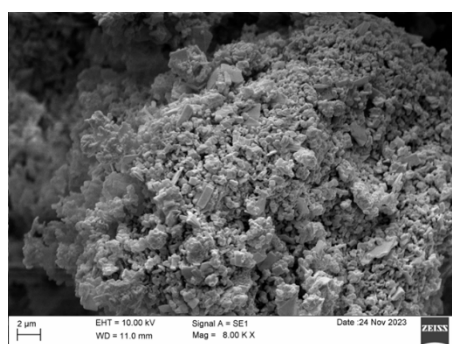a) Diboron 

45 min

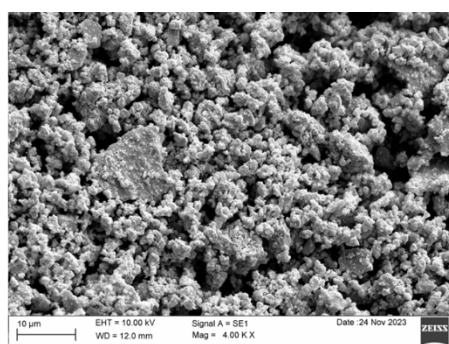b) Pd/C 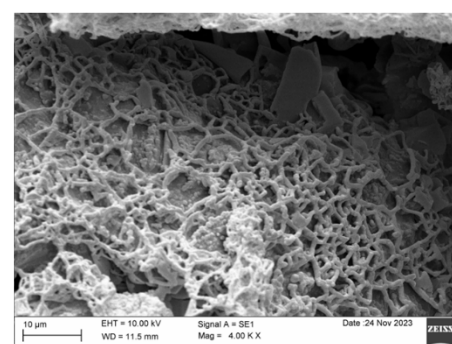c) Organic reagent 

90 min

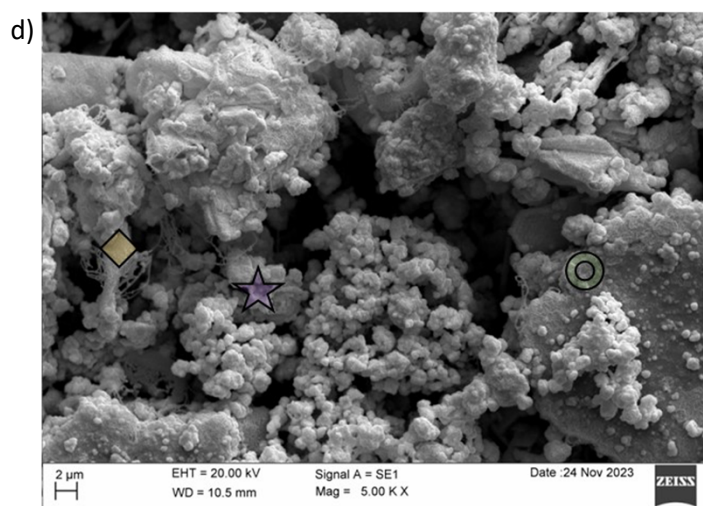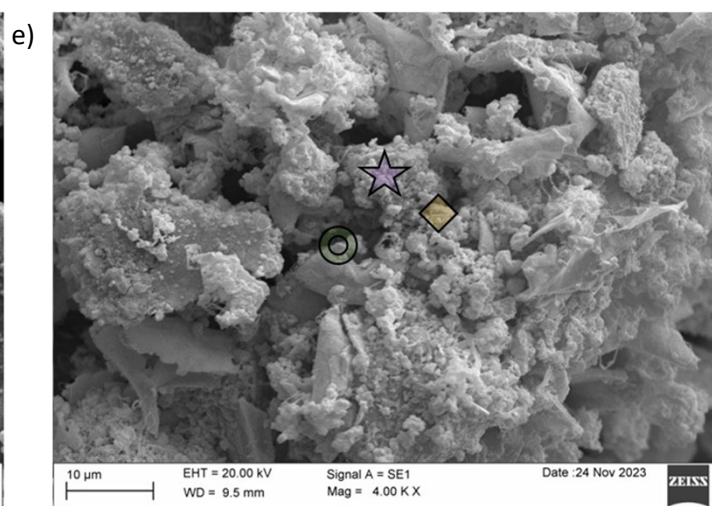

**Figure S4.** SEM images of the reagents; a) diboron compound **1**; b) Pd/C; c) Phenyl vinyl sulfone; d) reaction mixture after 45 minutes grinding; e) reaction mixture after 90 minutes grinding.

## 7. Characterization data of products

### Benzyl alcohol **3a**

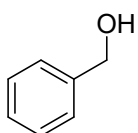

The title compound was synthesized according to the general procedure stated above. **2a** (102  $\mu$ l, 1 mmol), (456 mg, 2 mmol) and H<sub>2</sub>O (36  $\mu$ l, 2 mmol) were used, to afford **3a** as a colourless liquid (106.3 mg, 0.98 mmol, 98%).

**<sup>1</sup>H NMR** (600 MHz, CDCl<sub>3</sub>):  $\delta$  = 7.34 – 7.25 (m, 5H), 4.60 – 4.58 (m, 2H), 2.66 – 2.48 (m, 1H).

**<sup>13</sup>C NMR** (151 MHz, CDCl<sub>3</sub>):  $\delta$  = 140.9, 128.6, 127.6, 127.1, 65.2.

The spectroscopic data closely match the ones previously reported in the literature.<sup>1</sup>

### 4-Chloro benzyl alcohol **3b**

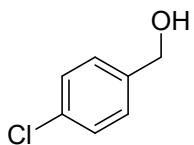

The title compound was synthesized according to the general procedure A. **2b** (140.6, 1 mmol), **1** (455.8 mg, 2 mmol) and H<sub>2</sub>O (36  $\mu$ l, 2 mmol) were used, to afford **3b** as a white solid (134.9 mg, 0.95 mmol, 95%).

**<sup>1</sup>H NMR** (600 MHz, CDCl<sub>3</sub>):  $\delta$  = 7.34-7.32 (d,  $J$  = 8.8 Hz, 2H), 7.30-7.29 (d,  $J$  = 8.8 Hz, 2H), 4.67 (s, 2H).

**<sup>13</sup>C NMR** (151 MHz, CDCl<sub>3</sub>):  $\delta$  = 139.4, 133.5, 128.8, 128.4, 64.7.

The spectroscopic data closely match the ones previously reported in the literature.<sup>2</sup>

**4-Bromo benzyl alcohol 3c**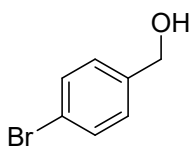

The title compound was synthesized according to the general procedure A. **2c** (185.0, 1 mmol), **1** (455.8 mg, 2 mmol) and H<sub>2</sub>O (36  $\mu$ l, 2 mmol) were used, to afford **3c** as a pale-yellow solid (179.6 mg, 0.96 mmol, 96%).

**<sup>1</sup>H NMR** (600 MHz, CDCl<sub>3</sub>):  $\delta$  = 7.49-7.48 (m, 2H), 7.25-7.24 (m, 2H), 4.66 (s, 2H).

**<sup>13</sup>C NMR** (151 MHz, CDCl<sub>3</sub>):  $\delta$  = 139.9, 131.8, 128.7, 121.6, 64.8.

The spectroscopic data closely match the ones previously reported in the literature.<sup>1</sup>

**4-Cyano benzyl alcohol 3d**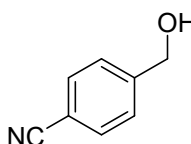

The title compound was synthesized according to the general procedure A. **2d** (131.1, 1 mmol), **1** (455.8 mg, 2 mmol) and H<sub>2</sub>O (36  $\mu$ l, 2 mmol) were used, to afford **3d** as a colourless solid (123.8 mg, 0.93 mmol, 93%).

**<sup>1</sup>H NMR** (600 MHz, CDCl<sub>3</sub>):  $\delta$  = 7.63-7.62 (d,  $J$  = 7.8 Hz, 2H), 7.47-7.46 (d,  $J$  = 7.8 Hz, 2H), 4.76 (s, 2H), 2.34-2.39 (bs, 1H).

**<sup>13</sup>C NMR** (151 MHz, CDCl<sub>3</sub>):  $\delta$  = 146.4, 132.4, 127.2, 119.0, 111.3, 64.3.

The spectroscopic data closely match the ones previously reported in the literature.<sup>3</sup>

**4-Trifluoromethyl benzyl alcohol 3e**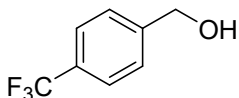

The title compound was synthesized according to the general procedure A. **2e** (174.1 mg, 1 mmol), **1** (455.8 mg, 2 mmol) and H<sub>2</sub>O (36  $\mu$ l, 2 mmol) were used, to afford **3e** as a yellowish liquid (174.4 mg, 0.99 mmol, 99%).

**<sup>1</sup>H NMR** (600 MHz, CDCl<sub>3</sub>):  $\delta$  = 7.61-7.60 (d,  $J$  = 8.4 Hz, 2H), 7.47-7.45 (d,  $J$  = 8.4 Hz, 2H), 4.75-4.74 (s, 2H), 2.12 (bs, 1H).

**<sup>13</sup>C NMR** (151 MHz, CDCl<sub>3</sub>):  $\delta$  = 144.8, 129.1 (q,  $J_{C-F}$  = 135.9 Hz), 125.7, 125.6, 123.9 (q,  $J_{C-F}$  = 271.8 Hz), 64.6.

**<sup>19</sup>F NMR** (565 MHz, CDCl<sub>3</sub>):  $\delta$  = -62.55.

The spectroscopic data closely match the ones previously reported in the literature.<sup>4</sup>

**2-Nitro benzyl alcohol 3f**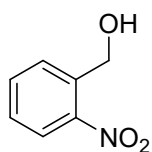

The title compound was synthesized according to the general procedure A. **2f** (151.1 mg, 1 mmol), **1** (455.8 mg, 2 mmol) and H<sub>2</sub>O (36  $\mu$ l, 2 mmol) were used, to afford **3f** as a yellowish liquid (79.6 mg, 0.52 mmol, 52%).

**<sup>1</sup>H NMR** (600 MHz, CDCl<sub>3</sub>):  $\delta$  = 8.11-8.10 (m, 1H), 7.75-7.73 (m, 1H), 7.69-7.66 (m, 1H), 7.49-7.47 (m, 1H), 4.98-4.97 (s, 2H), 2.53-2.51 (bs, 1H).

**<sup>13</sup>C NMR** (151 MHz, CDCl<sub>3</sub>):  $\delta$  = 150.0, 136.9, 134.3, 130.2, 128.7, 125.2, 62.7.

The spectroscopic data closely match the ones previously reported in the literature.<sup>5</sup>

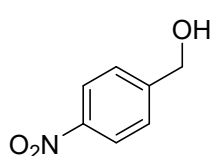**4-Nitro benzyl alcohol 3g**

The title compound was synthesized according to the general procedure A. **2g** (151.1 mg, 1 mmol), **1** (455.8 mg, 2 mmol) and H<sub>2</sub>O (36  $\mu$ l, 2 mmol) were used, to afford **3g** as a yellowish liquid (145.5 mg, 0.95 mmol, 95%).

**<sup>1</sup>H NMR** (600 MHz, CDCl<sub>3</sub>):  $\delta$  = 8.22 – 8.21 (m, 2H), 7.54-7.53 (m, 2H), 4.84 (s, 2H), 1.98 (bs, 1H).

**<sup>13</sup>C NMR** (151 MHz, CDCl<sub>3</sub>):  $\delta$  = 148.3, 147.5, 127.2, 123.9, 64.2.

The spectroscopic data closely match the ones previously reported in the literature.<sup>1</sup>

**2-Methyl benzyl alcohol 3h**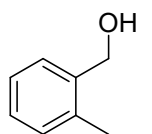

The title compound was synthesized according to the general procedure A. **2h** (120.2 mg, 1 mmol), **1** (455.8 mg, 2 mmol) and H<sub>2</sub>O (36  $\mu$ l, 2 mmol) were used, to afford **3h** as a colourless liquid (114.8 mg, 0.94 mmol, 94%).

**<sup>1</sup>H NMR** (600 MHz, CDCl<sub>3</sub>):  $\delta$  = 7.36-7.35 (m, 1H), 7.22-7.18 (m, 3H), 4.71 (s, 2H), 2.37 (s, 3H).

**<sup>13</sup>C NMR** (151 MHz, CDCl<sub>3</sub>):  $\delta$  = 138.8, 136.3, 130.5, 128.0, 127.9, 126.2, 63.7, 18.8.

The spectroscopic data closely match the ones previously reported in the literature.<sup>5</sup>

**4-Methyl benzyl alcohol 3i**

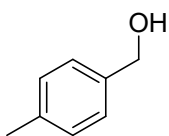

The title compound was synthesized according to the general procedure A. **2i** (120.2 mg, 1 mmol), **1** (455.8 mg, 2 mmol), and H<sub>2</sub>O (36  $\mu$ l, 2 mmol) were used to afford **3i** as a white solid (118.5 mg, 0.97 mmol, 97%).

**<sup>1</sup>H NMR** (600 MHz, CDCl<sub>3</sub>):  $\delta$  = 7.26-7.25 (dd,  $J$  = 7.9 Hz, 2H), 7.18-7.17 (dd,  $J$  = 7.9 Hz, 2H), 4.65-4.64 (d,  $J$  = 5.8 Hz, 2H), 2.36 (s, 3H), 1.67-1.65 (t,  $J$  = 5.8 Hz, 1H).

**<sup>13</sup>C NMR** (151 MHz, CDCl<sub>3</sub>):  $\delta$  = 138.1, 137.5, 129.4, 127.3, 65.4, 21.3.

The spectroscopic data closely match the ones previously reported in the literature.<sup>2</sup>

#### 4-*tert*-Buthyl benzyl alcohol **3j**

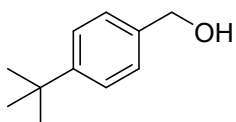

The title compound was synthesized according to the general procedure A. **2j** (162.2 mg, 1 mmol), **1** (455.8 mg, 2 mmol) and H<sub>2</sub>O (36  $\mu$ l, 2 mmol) were used, to afford **3j** as a colourless liquid (161.0 mg, 0.98 mmol, 98%).

**<sup>1</sup>H NMR** (600 MHz, CDCl<sub>3</sub>):  $\delta$  = 7.41-7.40 (dd,  $J$  = 8.8 Hz, 2H), 7.32-7.31 (dd,  $J$  = 8.8 Hz, 2H), 4.66 (s, 2H), 1.34 (s, 9H).

**<sup>13</sup>C NMR** (151 MHz, CDCl<sub>3</sub>):  $\delta$  = 150.9, 138.1, 127.0, 125.6, 65.4, 34.7, 31.5.

The spectroscopic data closely match the ones previously reported in the literature.<sup>6</sup>

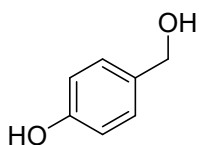

#### 4-hydroxy benzyl alcohol **3k**

The title compound was synthesized according to the general procedure A. **2k** (122.1 mg, 1 mmol), **1** (455.8 mg, 2 mmol) and H<sub>2</sub>O (36  $\mu$ l, 2 mmol) were used, to afford **3k** as a colourless liquid (111.7 mg, 0.90 mmol, 90%).

**<sup>1</sup>H NMR** (600 MHz, DMSO):  $\delta$  = 9.21 (s, 1H), 7.11-7.09 (dd,  $J$  = 7.6 Hz, 2H), 6.71-6.69 (dd,  $J$  = 7.6 Hz, 2H), 4.93 (s, 1H), 4.36 (s, 2H).

**<sup>13</sup>C NMR** (151 MHz, DMSO):  $\delta$  = 156.2, 132.8, 128.0, 114.8, 62.8.

The spectroscopic data closely match the ones previously reported in the literature.<sup>5</sup>

**4-Methoxy benzyl alcohol 3l**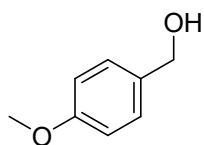

The title compound was synthesized according to the general procedure A. **2l** (136.2 mg, 1 mmol), **1** (455.8 mg, 2 mmol) and H<sub>2</sub>O (36  $\mu$ l, 2 mmol) were used, to afford **3l** as a colourless liquid (136.8 mg, 0.99 mmol, 99%).

**<sup>1</sup>H NMR** (600 MHz, CDCl<sub>3</sub>):  $\delta$  = 7.28 – 7.27 (dd,  $J$  = 8.3 Hz, 2H), 6.90 – 6.88 (dd,  $J$  = 8.3 Hz, 2H), 4.59 (s, 2H), 3.80 (s, 3H), 1.99 – 1.83 (m, 1H).

**<sup>13</sup>C NMR** (151 MHz, CDCl<sub>3</sub>):  $\delta$  = 159.3, 133.3, 128.7, 114.1, 65.1, 55.4.

The spectroscopic data closely match the ones previously reported in the literature.<sup>1</sup>

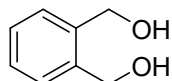**1,2-Benzenedimethanol 3m**

The title compound was synthesized according to the general procedure A. **2m** (134.1 mg, 1 mmol), **1** (683.7 mg, 3 mmol) and H<sub>2</sub>O (48  $\mu$ l, 3 mmol) were used, to afford **3m** as a white solid (123.0 mg, 0.89 mmol, 89%).

**<sup>1</sup>H NMR** (600 MHz, CDCl<sub>3</sub>):  $\delta$  = 7.30 (m, 4H), 4.62 (s, 4H), 3.76 (s, 2H).

**<sup>13</sup>C NMR** (151 MHz, CDCl<sub>3</sub>):  $\delta$  = 139.5, 129.8, 128.6, 64.1.

The spectroscopic data closely match the ones previously reported in the literature.<sup>7</sup>

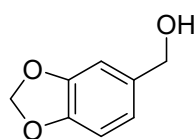**Piperonyl alcohol 3n**

The title compound was synthesized according to the general procedure A. **2n** (150.1 mg, 1 mmol), **1** (455.8 mg, 2 mmol) and H<sub>2</sub>O (36  $\mu$ l, 2 mmol) were used, to afford **3n** as a white solid (138.1 mg, 0.91 mmol, 91%).

**<sup>1</sup>H NMR** (600 MHz, CDCl<sub>3</sub>):  $\delta$  = 6.85 – 6.76 (m, 3H), 5.94 (s, 2H), 4.55 (s, 2H), 1.95 (s, 1H).

**<sup>13</sup>C NMR** (151 MHz, CDCl<sub>3</sub>):  $\delta$  = 147.9, 147.2, 135.0, 120.6, 108.3, 108.0, 101.1, 65.3.

The spectroscopic data closely match the ones previously reported in the literature.<sup>6</sup>

**Furfuryl alcohol 3o**

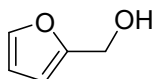

The title compound was synthesized according to the general procedure A. **2o** (96.1 mg, 1 mmol), **1** (455.8 mg, 2 mmol) and H<sub>2</sub>O (36  $\mu$ l, 2 mmol) were used, to afford **3o** as a yellowish liquid (94.2 mg, 0.96 mmol, 96%).

**<sup>1</sup>H NMR** (600 MHz, CDCl<sub>3</sub>):  $\delta$  = 7.35 (m, 1H), 6.30 – 6.29 (m, 1H), 6.23 – 6.22 (m, 1H), 4.49 (s, 2H), 3.43 (bs, 1H).

**<sup>13</sup>C NMR** (151 MHz, CDCl<sub>3</sub>):  $\delta$  = 154.1, 142.4, 110.3, 107.6, 57.0.

The spectroscopic data closely match the ones previously reported in the literature.<sup>8</sup>

### Cinnamyl alcohol **3p**

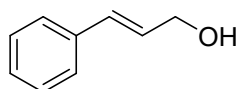

The title compound was synthesized according to the general procedure A. **2p** (132.2 mg, 1 mmol), **1** (455.8 mg, 2 mmol), and H<sub>2</sub>O (36  $\mu$ l, 2 mmol) were used to afford **3p** as a colourless liquid (126.1 mg, 0.94 mmol, 94%).

**<sup>1</sup>H NMR** (600 MHz, CDCl<sub>3</sub>):  $\delta$  = 7.34 – 7.19 (m, 5H), 6.58 – 6.54 (m, 1H), 6.32-6.28 (m, 1H), 4.26-4.25 (m, 2H), 2.58 (s, 1H).

**<sup>13</sup>C NMR** (151 MHz, CDCl<sub>3</sub>):  $\delta$  = 136.8, 131.0, 128.7, 128.6, 127.7, 126.5, 63.5.

The spectroscopic data closely match the ones previously reported in the literature.<sup>1</sup>

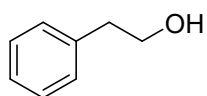

### 2-Phenyl-1-ethanol **3q**

The title compound was synthesized according to the general procedure B. **2q** (120.2 mg, 1 mmol), **1** (455.8 mg, 2 mmol), LiCl (42.4 mg, 1 mmol) and H<sub>2</sub>O (36  $\mu$ l, 2 mmol) were used, to afford **3q** after a short silica pad (SiO<sub>2</sub>/*n*-heptane:ethyl acetate 95:5% to acetate 100% v/v) as a colourless liquid (45.2 mg, 0.37 mmol, 37%).

**<sup>1</sup>H NMR** (600 MHz, CDCl<sub>3</sub>):  $\delta$  = 7.30 – 7.20 (m, 5H), 3.81-3.79 (t, *J* = 5.8 Hz, 2H), 2.84-2.82 (t, *J* = 5.8 Hz, 2H), 1.99 (bs, 1H).

**<sup>13</sup>C NMR** (151 MHz, CDCl<sub>3</sub>):  $\delta$  = 138.6, 129.1, 128.6, 126.5, 63.7, 39.2.

The spectroscopic data closely match the ones previously reported in the literature.<sup>9</sup>

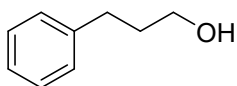**3-Phenyl-1-propanol 3r**

The title compound was synthesized according to the general procedure B. **2r** (134.2 mg, 1 mmol), **1** (455.8 mg, 2 mmol), LiCl (42.4 mg, 1 mmol), and H<sub>2</sub>O (36  $\mu$ l, 2 mmol) were used, to afford **3r** after a short silica pad (SiO<sub>2</sub>/*n*-heptane:ethyl acetate 95:5% to acetate 100% v/v) as a colourless liquid (54.5 mg, 0.40 mmol, 40%).

**<sup>1</sup>H NMR** (600 MHz, CDCl<sub>3</sub>):  $\delta$  = 7.31-7.28 (m, 2H), 7.21 – 7.18 (m, 3H), 3.69-3.67 (t, 2H), 2.73 – 2.71 (m, 2H), 1.93 – 1.88 (m, 2H).

**<sup>13</sup>C NMR** (151 MHz, CDCl<sub>3</sub>):  $\delta$  = 142.0, 128.6, 128.5, 126.0, 62.4, 34.4, 32.2.

The spectroscopic data closely match the ones previously reported in the literature.<sup>10</sup>

**3-(4-Hydroxyphenyl)-1-propanol 3s**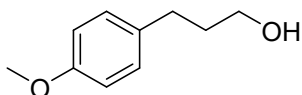

The title compound was synthesized according to the general procedure B. **2s** (164.2 mg, 1 mmol), **1** (455.8 mg, 2 mmol), LiCl (42.4 mg, 1 mmol) and H<sub>2</sub>O (36  $\mu$ l, 2 mmol) were used, to afford **3s** after a short silica pad (SiO<sub>2</sub>/*n*-heptane:ethyl acetate 95:5% to acetate 100% v/v) as a yellowish liquid (69.8 mg, 0.42 mmol, 42%).

**<sup>1</sup>H NMR** (600 MHz, CDCl<sub>3</sub>):  $\delta$  = 7.13-7.11 (d, *J* = 8.3, Hz, 2H), 6.84-6.83 (dd, *J* = 8.3 Hz, 2H), 3.79 (s, 3H), 3.67 – 3.65 (m, 2H), 2.67 – 2.64 (m, 2H), 1.89 – 1.84 (m, 2H).

**<sup>13</sup>C NMR** (151 MHz, CDCl<sub>3</sub>):  $\delta$  = 157.9, 134.0, 129.4, 114.0, 62.4, 55.4, 34.6, 31.3.

The spectroscopic data closely match the ones previously reported in the literature.<sup>10</sup>

**Octanol 3t**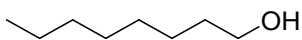

The title compound was synthesized according to the general procedure B. **2t** (128.2 mg, 1 mmol), **1** (455.8 mg, 2 mmol), LiCl (42.4 mg, 1 mmol) and H<sub>2</sub>O (36  $\mu$ l, 2 mmol) were used, to afford **3t** after a short silica pad (SiO<sub>2</sub>/*n*-heptane: ethyl acetate 95:5% to acetate 100% v/v) as a colourless liquid (45.6 mg, 0.35 mmol, 35%).

**<sup>1</sup>H NMR** (600 MHz, CDCl<sub>3</sub>):  $\delta$  = 3.57-3.54 (m, 2H), 2.64 – 2.51 (bs, 1H), 1.53-1.49 (m, 2H), 1.31-1.22 (m, 10H), 0.85-0.83 (m, 3H).

**<sup>13</sup>C NMR** (151 MHz, CDCl<sub>3</sub>):  $\delta$  = 62.9, 32.8, 31.9, 29.5, 29.4, 25.9, 22.7, 14.1.

The spectroscopic data closely match the ones previously reported in the literature.<sup>5</sup>

**Dodecanol 3u**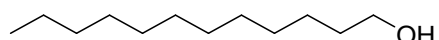

The title compound was synthesized according to the general procedure B. **2u** (184.3 mg, 1 mmol), **1** (455.8 mg, 2 mmol), LiCl (42.4 mg, 1 mmol) and H<sub>2</sub>O (36  $\mu$ l, 2 mmol) were used, to afford **3u** after a short silica pad (SiO<sub>2</sub>/*n*-heptane:ethyl acetate 95:5% to acetate 100% v/v) as a colourless solid (59.6 mg, 0.32 mmol, 32%).

**<sup>1</sup>H NMR** (600 MHz, CDCl<sub>3</sub>):  $\delta$  = 3.64-3.62 (m, 2H), 1.58-1.54 (m, 2H), 1.36-1.26 (m, 19H), 0.89-0.86 (m, 3H).

**<sup>13</sup>C NMR** (151 MHz, CDCl<sub>3</sub>):  $\delta$  = 63.2, 33.0, 32.1, 30.0, 29.9, 29.8, 29.7, 29.6, 29.5, 25.9, 22.8, 14.3.

The spectroscopic data closely match the ones previously reported in the literature.<sup>11</sup>

**1-Phenyl-1-ethanol 5a**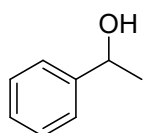

The title compound was synthesized according to the general procedure B. **4a** (120.2, 1 mmol), **1** (456 mg, 2 mmol), LiCl (42.4 mg, 1 mmol), and H<sub>2</sub>O (36  $\mu$ l, 2 mmol) were used, to afford **5a** after a short silica pad (SiO<sub>2</sub>/*n*-heptane:ethyl acetate 95:5% to acetate 100% v/v) as a colourless liquid (52.5 mg, 0.43 mmol, 43%).

**<sup>1</sup>H NMR** (600 MHz, CDCl<sub>3</sub>):  $\delta$  = 7.32-7.22 (m, 5H), 4.82-4.78 (m, 1H), 2.54-2.41 (m, 1H), 1.44-1.42 (d, 3H).

**<sup>13</sup>C NMR** (151 MHz, CDCl<sub>3</sub>):  $\delta$  = 145.9, 128.5, 127.4, 125.5, 70.3, 25.2.

The spectroscopic data closely match the ones previously reported in the literature.<sup>2</sup>

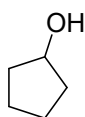**Cyclopentanol 5b**

The title compound was synthesized according to the general procedure B. **4b** (84.12 mg, 1 mmol), **1** (456 mg, 2 mmol), LiCl (42.4 mg, 1 mmol) and H<sub>2</sub>O (36  $\mu$ l, 2 mmol) were used, to afford **5b** as a colourless liquid (85.3 mg, 0.99 mmol, 99%).

**<sup>1</sup>H NMR** (600 MHz, CDCl<sub>3</sub>):  $\delta$  = 4.33-4.32 (m, 1H), 1.80-1.72 (m, 4H), 1.59-1.53 (m, 4H), 1.38-1.36 (m, 1H)

**<sup>13</sup>C NMR** (151 MHz, CDCl<sub>3</sub>):  $\delta$  = 74.2, 35.7, 23.4.

The spectroscopic data closely match the ones previously reported in the literature.<sup>12</sup>

### Cyclohexanol **5c**

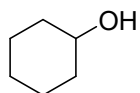

The title compound was synthesized according to the general procedure B. **4c** (98.2 mg, 1 mmol), **1** (456 mg, 2 mmol), LiCl (42,4 mg, 1 mmol) and H<sub>2</sub>O (36 µl, 2 mmol) were used, to afford **5c** as a colourless liquid (98.2 mg, 0.98 mmol, 98%).

**<sup>1</sup>H NMR** (600 MHz, CDCl<sub>3</sub>):  $\delta$  = 3.55-3.51 (m, 1H), 2.54-2.39 (m, 1H), 1.84-1.81 (m, 2H), 1.69-1.65 (m, 2H), 1.50-1.47 (m, 1H), 1.25-1.09 (m, 5H).

**<sup>13</sup>C NMR** (151 MHz, CDCl<sub>3</sub>):  $\delta$  = 70.3, 35.5, 25.5, 24.2.

The spectroscopic data closely match the ones previously reported in the literature.<sup>13</sup>

### 4-Hydroxy-1-methylpiperidine **5d**

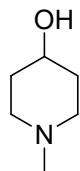

The title compound was synthesized according to the general procedure B. **4d** (113.16 mg, 1 mmol), **1** (456 mg, 2 mmol), LiCl (42,4 mg, 1 mmol) and H<sub>2</sub>O (36 µl, 2 mmol) were used, to afford **5d** as a colourless liquid (112.69 mg, 0.98 mmol, 98%).

**<sup>1</sup>H NMR** (600 MHz, CDCl<sub>3</sub>):  $\delta$  = 3.55 (m, 1H), 2.66 – 2.63 (m, 2H), 2.18 (s, 3H), 2.04 (m, 2H), 1.81 – 1.78 (m, 2H), 1.54 – 1.50 (m, 2H).

**<sup>13</sup>C NMR** (151 MHz, CDCl<sub>3</sub>):  $\delta$  = 66.9, 53.4, 46.1, 34.4.

The spectroscopic data closely match the ones previously reported in the literature.<sup>14</sup>

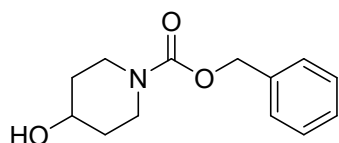

**1-(4-Hydroxy-1-piperidinyl)-2-phenylethanone **5e****

The title compound was synthesized according to the general procedure above. **4e** (233.3 mg, 1 mmol), **1** (456 mg, 2 mmol), (42,4 mg, 1 mmol) and H<sub>2</sub>O (36 µl, 2 mmol) were used, to afford **5e** as a yellowish oil (223.5 mg, 0.95 mmol, 95%).

**<sup>1</sup>H NMR** (600 MHz, CDCl<sub>3</sub>):  $\delta$  = 7.37-7.29 (m, 5H), 5.12 (s, 2H), 3.91-3.81 (m, 3H), 3.15-3.11 (m, 2H), 2.22-2.08 (bs, 1H), 1.86 - 1.83 (m, 2H), 1.48-1.47 (m, 2H).

**<sup>13</sup>C NMR** (151 MHz, CDCl<sub>3</sub>):  $\delta$  = 155.4, 136.8, 128.6, 128.1, 127.9, 67.4, 67.2, 41.5, 34.1.

The spectroscopic data closely match the ones previously reported in the literature.<sup>15</sup>

**2-Adamantanol 5f**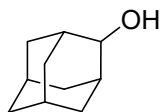

The title compound was synthesized according to the general procedure above. **4f** (150.2 mg, 1 mmol), **1** (456 mg, 2 mmol), LiCl (42.4 mg, 1 mmol) and H<sub>2</sub>O (36  $\mu$ l, 2 mmol) were used, to afford **5f** after a short silica pad (SiO<sub>2</sub>/*n*-heptane:ethyl acetate 95:5% to acetate 100% v/v) as a white solid (63.8 mg, 0.42 mmol, 42%).

**<sup>1</sup>H NMR** (600 MHz, CDCl<sub>3</sub>):  $\delta$  = 3.87 (s, 1H), 2.08-2.05 (m, 2H), 1.89-1.79 (m, 6H), 1.72-1.69 (m, 4H), 1.57-1.52 (m, 3H).

**<sup>13</sup>C NMR** (151 MHz, CDCl<sub>3</sub>):  $\delta$  = 74.7, 37.7, 36.7, 34.7, 31.2, 27.7, 27.2.

The spectroscopic data closely match the ones previously reported in the literature.<sup>16</sup>

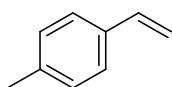**4-Methylstyrene 7a**

The title compound was synthesized according to the general procedure above. **6a** (116.2 mg, 1 mmol), **1** (227.9 mg, 1 mmol), Pd/C (3 mol %) and H<sub>2</sub>O (18  $\mu$ l, 1 mmol) were used, to afford **5a** as a colourless liquid (115.8 mg, 0.98 mmol, 98%).

**<sup>1</sup>H NMR** (600 MHz, CDCl<sub>3</sub>):  $\delta$  = 7.29-7.27 (d, *J* = 8.8 Hz, 2H), 7.11-7.09 (d, *J* = 8.8 Hz 2H), 6.69-6.64 (m, 1H), 5.69-5.65 (m, 1H), 5.17-5.15 (m, 1H), 2.31 (s, 2H).

**<sup>13</sup>C NMR** (151 MHz, CDCl<sub>3</sub>):  $\delta$  = 137.7, 136.9, 135.0, 129.3, 126.3, 112.8, 21.3.

The spectroscopic data closely match the ones previously reported in the literature.<sup>17</sup>

**1-Ethenylcyclohexanol 7b**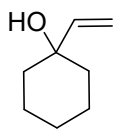

The title compound was synthesized according to the general procedure above. **6b** (124.2 mg, 1 mmol), **1** (227.9 mg, 1 mmol), Pd/C (3 mol %) and H<sub>2</sub>O (18  $\mu$ l, 1 mmol) were used, to afford an inseparable mixture of **7b** and unreacted **6b** (116.1 mg, 0.92 mmol, 92%).

**<sup>1</sup>H NMR** (600 MHz, CDCl<sub>3</sub>):  $\delta$  = 5.98 (dd, *J* = 17.4, 10.8, 1H), 5.24 (dd, *J* = 17.4, 1.4, 1H), 5.04 (dd, *J* = 10.8, 1.4, 1H), 1.69–1.62 (m, 2H), 1.59–1.49 (m, 7H), 1.35–1.27 (m, 1H).

**<sup>13</sup>C NMR** (151 MHz, CDCl<sub>3</sub>):  $\delta$  = 146.2, 111.6, 71.9, 37.7, 25.7, 22.2.

The spectroscopic data closely match the ones previously reported in the literature.<sup>18</sup>

**Cinnamyl alcohol 7c**

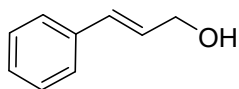

The title compound was synthesized according to the general procedure above. **6c** (132.2 mg, 1 mmol), **1** (227.9 mg, 1 mmol), Pd/C (3 mol %) and H<sub>2</sub>O (18  $\mu$ l, 1 mmol) were used, to afford **7c** as a yellowish liquid (124.8 mg, 0.93 mmol, 93%).

**<sup>1</sup>H NMR** (600 MHz, CDCl<sub>3</sub>):  $\delta$  = 7.35-7.33 (d,  $J$  = 7.8 Hz, 2H), 7.27-7.25 (m, 1H), 7.21-7.20 (d,  $J$  = 7.8 Hz, 2H), 6.58-6.56 (m, 1H), 5.89-5.85 (m, 1H), 4.44-4.43 (m, 2H).

**<sup>13</sup>C NMR** (151 MHz, CDCl<sub>3</sub>):  $\delta$  = 136.7, 131.3, 131.2, 128.9, 128.4, 127.4, 59.8.

The spectroscopic data closely match the ones previously reported in the literature.<sup>1</sup>

#### 4-methyl ethylbenzene **8a**

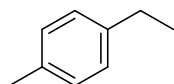

The title compound was synthesized according to the general procedure above. **6a** (116.2 mg, 1 mmol), **1** (455.8 mg, 2 mmol), Pd/C (3 mol %) and H<sub>2</sub>O (36  $\mu$ l, 2 mmol) were used, to afford **8a** as a colourless liquid (113.0 mg, 0.94 mmol, 94%).

The title compound was synthesized according to the general procedure above. **7a** (118.2 mg, 1 mmol), **1** (227.9 mg, 1 mmol), Pd/C (3 mol %) and H<sub>2</sub>O (18  $\mu$ l, 1 mmol) were used, to afford **8a** as a colourless liquid (116.6 mg, 0.97 mmol, 97%).

**<sup>1</sup>H NMR** (600 MHz, CDCl<sub>3</sub>):  $\delta$  = 7.10 (m, 4H), 2.64-2.60 (q,  $J$  = 5.9 Hz, 2H), 2.32 (s, 3H), 1.24 – 1.21 (t,  $J$  = 5.9 Hz, 3H).

**<sup>13</sup>C NMR** (151 MHz, CDCl<sub>3</sub>):  $\delta$  = 141.4, 135.1, 129.1, 127.9, 28.6, 21.1, 15.9.

The spectroscopic data closely match the ones previously reported in the literature.<sup>19</sup>

#### 1-Ethylcyclohexanol **8b**

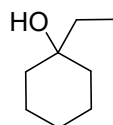

The title compound was synthesized according to the general procedure above. **6b** (124.2 mg, 1 mmol), **1** (455.8 mg, 2 mmol), Pd/C (3 mol %) and H<sub>2</sub>O (36  $\mu$ l, 2 mmol) were used, to afford **8b** as a brownish oil (113.0 mg, 0.94 mmol, 94%).

**<sup>1</sup>H NMR** (600 MHz, CDCl<sub>3</sub>):  $\delta$  = 1.61-1.24 (m, 13H), 0.90-0.88 (m, 3H).

**<sup>13</sup>C NMR** (151 MHz, CDCl<sub>3</sub>):  $\delta$  = 71.6, 37.1, 35.0, 26.0, 22.4, 7.3.

The spectroscopic data closely match the ones previously reported in the literature.<sup>20</sup>

#### Ethyl 3-phenylpropanoate **8f**

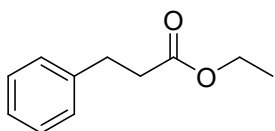

The title compound was synthesized according to the general procedure above. **7f** (176.2 mg, 1 mmol), **1** (227.9 mg, 1 mmol), Pd/C (3 mol %) and H<sub>2</sub>O (18  $\mu$ l, 1 mmol) were used, to afford **8f** as a yellow liquid (172.9 mg, 0.97 mmol, 97%).

**<sup>1</sup>H NMR** (600 MHz, CDCl<sub>3</sub>):  $\delta$  = 7.30-7.28 (m, 2H), 7.22-7.19 (m, 3H), 4.15-4.11 (q,  $J$  = 7.0 Hz, 2H), 2.97-2.94 (t,  $J$  = 7.0 Hz, 2H), 2.64-2.61 (t,  $J$  = 6.5 Hz, 2H), 1.25-1.23 (t,  $J$  = 6.5 Hz, 3H).

**<sup>13</sup>C NMR** (151 MHz, CDCl<sub>3</sub>):  $\delta$  = 173.1, 140.7, 128.6, 128.4, 126.4, 60.5, 36.1, 31.1, 14.3.

The spectroscopic data closely match the ones previously reported in the literature.<sup>20</sup>

### Styrene **8g**

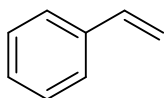

The title compound was synthesized according to the general procedure above. **6g** (102.2 mg, 1 mmol), **1** (227.9 mg, 1 mmol), Pd/C (3 mol %) and H<sub>2</sub>O (18  $\mu$ l, 1 mmol) were used, to afford **8g** as a yellow liquid (103.2 mg, 0.99 mmol, 99%).

**<sup>1</sup>H NMR** (600 MHz, CDCl<sub>3</sub>):  $\delta$  7.41 (d,  $J$  = 7.6 Hz, 2H), 7.35 – 7.30 (m, 2H), 7.28 – 7.24 (m, 2H), 6.73 (dd,  $J$  = 17.6, 10.9 Hz, 1H), 5.75 (d,  $J$  = 17.6 Hz, 1H), 5.25 (d,  $J$  = 10.9 Hz, 1H).

**<sup>13</sup>C NMR** (151 MHz, CDCl<sub>3</sub>):  $\delta$  137.7, 137.0, 128.7, 127.9, 126.4, 113.9.

The spectroscopic data closely match the ones previously reported in the literature.<sup>20</sup>

### Ethylbenzene **8h**

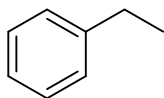

The title compound was synthesized according to the general procedure above. **6g** (102.2 mg, 1 mmol), **1** (227.9 mg, 1 mmol), Pd/C (3 mol %) and H<sub>2</sub>O (18  $\mu$ l, 1 mmol) were used, to afford **8h** as a yellow liquid (101.9 mg, 0.96 mmol, 96%).

The title compound was synthesized according to the general procedure above. **6g** (104.2 mg, 1 mmol), **1** (227.9 mg, 1 mmol), Pd/C (3 mol %) and H<sub>2</sub>O (18  $\mu$ l, 1 mmol) were used, to afford **8h** as a yellow liquid (101.9 mg, 0.96 mmol, 96%).

**<sup>1</sup>H NMR** (600 MHz, CDCl<sub>3</sub>):  $\delta$  7.34 – 7.29 (m, 2H), 7.25 – 7.15 (m, 3H), 2.68 (dtd,  $J$  = 10.1, 7.7, 2.3 Hz, 2H), 1.27 (tdd,  $J$  = 7.7, 3.5, 1.7 Hz, 3H).

**<sup>13</sup>C NMR** (151 MHz, CDCl<sub>3</sub>):  $\delta$  = 144.4, 128.5, 128.0, 125.7, 29.0, 15.8.

The spectroscopic data closely match the ones previously reported in the literature.<sup>20</sup>

**Aniline 10a**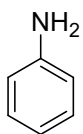

The title compound was synthesized according to the general procedure above. **9** (123.11 mg, 1 mmol), **1** (455.8 mg, 2 mmol), Pd/C (3 mol %) and H<sub>2</sub>O (36  $\mu$ l, 2 mmol) were used, to afford **10** after a short silica pad (SiO<sub>2</sub>/*n*-heptane:ethyl acetate 85:15%) as a colourless liquid (82.9 mg, 0.89 mmol, 89%).

**<sup>1</sup>H NMR** (600 MHz, CDCl<sub>3</sub>):  $\delta$  = 7.21-7.19 (t, *J* = 7.8 Hz 2H), 6.82-6.80 (t, *J* = 7.8 Hz 1H), 6.72-6.71 (d, *J* = 7.7 Hz 2H), 3.65 (s, 2H).

**<sup>13</sup>C NMR** (151 MHz, CDCl<sub>3</sub>):  $\delta$  = 146.5, 129.3, 118.6, 115.2.

The spectroscopic data closely match the ones previously reported in the literature.<sup>21</sup>

**Cyclohexylamine 10b**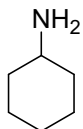

The title compound was synthesized according to the general procedure above. **9** (123.11 mg, 1 mmol), **1** (455.8 mg, 2 mmol), Pd/C (3 mol %), and H<sub>2</sub>O (36  $\mu$ l, 2 mmol) were used, to afford **10** after a short silica pad (SiO<sub>2</sub>/*n*-heptane: ethyl acetate 85:15%) as a colourless liquid (82.9 mg, 0.89 mmol, 89%).

**<sup>1</sup>H NMR** (600 MHz, CDCl<sub>3</sub>)  $\delta$  2.61 (tt, *J* = 10.5, 3.9 Hz, 1H), 1.80 (dt, *J* = 12.5, 3.9 Hz, 2H), 1.70 (dp, *J* = 11.6, 3.9 Hz, 2H), 1.63 – 1.54 (m, 1H), 1.37 (s, 2H), 1.25 (qt, *J* = 12.7, 3.6 Hz, 2H), 1.12 (tt, *J* = 12.5, 3.7 Hz, 1H), 1.03 (qd, *J* = 12.5, 3.6 Hz, 2H).

**<sup>13</sup>C NMR** (151 MHz, CDCl<sub>3</sub>)  $\delta$  50.6, 37.1, 25.8, 25.3.

The spectroscopic data closely match the ones previously reported in the literature.<sup>21</sup>

**2-Bromo aniline 10c**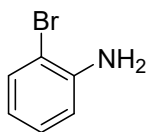

The title compound was synthesized according to the general procedure above. **9** (123.11 mg, 1 mmol), **1** (455.8 mg, 2 mmol), Pd/C (3 mol %) and H<sub>2</sub>O (36  $\mu$ l, 2 mmol) were used, to afford **10** after a short silica pad (SiO<sub>2</sub>/*n*-heptane:ethyl acetate 85:15%) as a colourless liquid (82.9 mg, 0.89 mmol, 89%).

**<sup>1</sup>H NMR** (600 MHz, CDCl<sub>3</sub>)  $\delta$  7.41 (dd, *J* = 8.0, 1.4 Hz, 1H), 7.13 – 7.08 (m, 1H), 6.76 (dd, *J* = 8.0, 1.4 Hz, 1H), 6.65 – 6.60 (m, 1H), 4.07 (s, 2H).

**<sup>13</sup>C NMR** (151 MHz, CDCl<sub>3</sub>)  $\delta$  144.2, 132.7, 128.5, 119.5, 115.9, 109.5.

The spectroscopic data closely match the ones previously reported in the literature.<sup>21</sup>

**2-Fluoro aniline 10d**

The title compound was synthesized according to the general procedure above. **9** (123.11 mg, 1 mmol), **1** (455.8 mg, 2 mmol), Pd/C (3 mol %) and H<sub>2</sub>O (36  $\mu$ l, 2 mmol) were used, to afford **10** after

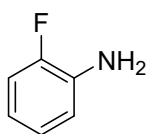

a short silica pad ( $\text{SiO}_2/n$ -heptane:ethyl acetate 85:15%) as a colourless liquid (82.9 mg, 0.89 mmol, 89%).

**$^1\text{H}$  NMR** (600 MHz,  $\text{CDCl}_3$ )  $\delta$  6.98 (m, 1H), 6.93 (m, 1H), 6.81 – 6.75 (m, 1H), 6.72 – 6.66 (m, 1H), 3.71 (s, 2H).

**$^{13}\text{C}$  NMR** (151 MHz,  $\text{CDCl}_3$ )  $\delta$  152.7, 134.7 (d,  $J_{\text{C-F}} = 255.2$  Hz), 124.6 (d,  $J_{\text{C-F}} = 15.1$  Hz), 118.8, 117.1, 115.4 (d,  $J_{\text{C-F}} = 30.2$  Hz).

The spectroscopic data closely match the ones previously reported in the literature.<sup>21</sup>

## 2-Iodo aniline 10e

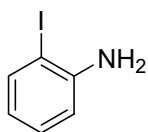

The title compound was synthesized according to the general procedure above. **9** (123.11 mg, 1 mmol), **1** (455.8 mg, 2 mmol), Pd/C (3 mol %) and  $\text{H}_2\text{O}$  (36  $\mu\text{l}$ , 2 mmol) were used, to afford **10** after a short silica pad ( $\text{SiO}_2/n$ -heptane:ethyl acetate 85:15%) as a colourless liquid (82.9 mg, 0.89 mmol, 89%).

**$^1\text{H}$  NMR** (600 MHz,  $\text{CDCl}_3$ )  $\delta$  7.64 (dd,  $J = 7.8, 1.4$  Hz, 1H), 7.14 (td,  $J = 7.6, 1.4$  Hz, 1H), 6.75 (dd,  $J = 8.0, 1.5$  Hz, 1H), 6.47 (td,  $J = 7.6, 1.5$  Hz, 1H), 4.18 – 3.98 (m, 2H).

**$^{13}\text{C}$  NMR** (151 MHz,  $\text{CDCl}_3$ )  $\delta$  146.8, 139.0, 129.3, 120.0, 114.7, 84.2.

The spectroscopic data closely match the ones previously reported in the literature.<sup>21</sup>

## 3-Chloro aniline 10f

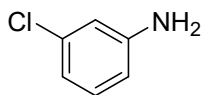

The title compound was synthesized according to the general procedure above. **9** (123.11 mg, 1 mmol), **1** (455.8 mg, 2 mmol), Pd/C (3 mol %) and  $\text{H}_2\text{O}$  (36  $\mu\text{l}$ , 2 mmol) were used, to afford **10** after a short silica pad ( $\text{SiO}_2/n$ -heptane:ethyl acetate 85:15%) as a colourless liquid (82.9 mg, 0.89 mmol, 89%).

**$^1\text{H}$  NMR** (600 MHz,  $\text{CDCl}_3$ )  $\delta$  7.06 (m, 1H), 6.75 – 6.70 (m, 1H), 6.69 – 6.64 (m, 1H), 6.54 (m, 1H), 3.71 (s, 2H).

**$^{13}\text{C}$  NMR** (151 MHz,  $\text{CDCl}_3$ )  $\delta$  147.8, 135.0, 130.4, 118.6, 115.1, 113.3.

The spectroscopic data closely match the ones previously reported in the literature.<sup>21</sup>

## 4-Bromo aniline 10g

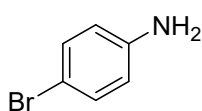

The title compound was synthesized according to the general procedure above. **9** (123.11 mg, 1 mmol), **1** (455.8 mg, 2 mmol), Pd/C (3 mol %) and  $\text{H}_2\text{O}$  (36  $\mu\text{l}$ , 2 mmol) were used, to afford **10** after a short silica pad ( $\text{SiO}_2/n$ -heptane:ethyl acetate 85:15%) as a colourless liquid (82.9 mg, 0.89 mmol, 89%).

**$^1\text{H}$  NMR** (600 MHz,  $\text{CDCl}_3$ )  $\delta$  7.23 (d,  $J = 8.8$  Hz, 2H), 6.59 – 6.54 (d,  $J = 8.8$  Hz, 2H), 3.65 (s, 2H).

**$^{13}\text{C}$  NMR** (151 MHz,  $\text{CDCl}_3$ )  $\delta$  145.6, 132.1, 116.8, 110.3.

The spectroscopic data closely match the ones previously reported in the literature.<sup>21</sup>

**4-Chloro aniline 10h**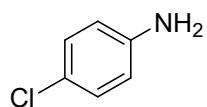

The title compound was synthesized according to the general procedure above. **9** (123.11 mg, 1 mmol), **1** (455.8 mg, 2 mmol), Pd/C (3 mol %) and H<sub>2</sub>O (36  $\mu$ l, 2 mmol) were used, to afford **10** after a short silica pad (SiO<sub>2</sub>/*n*-heptane:ethyl acetate 85:15%) as a colourless liquid (82.9 mg, 0.89 mmol, 89%).

**<sup>1</sup>H NMR** (600 MHz, CDCl<sub>3</sub>)  $\delta$  7.14 – 7.07 (m, 2H), 6.65 – 6.58 (m, 2H), 3.64 (s, 2H).

**<sup>13</sup>C NMR** (151 MHz, CDCl<sub>3</sub>)  $\delta$  145.1, 129.3, 123.3, 116.4.

The spectroscopic data closely match the ones previously reported in the literature.<sup>21</sup>

**4-Methoxy aniline 10i**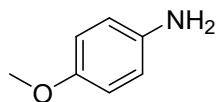

The title compound was synthesized according to the general procedure above. **9** (123.11 mg, 1 mmol), **1** (455.8 mg, 2 mmol), Pd/C (3 mol %) and H<sub>2</sub>O (36  $\mu$ l, 2 mmol) were used, to afford **10** after a short silica pad (SiO<sub>2</sub>/*n*-heptane:ethyl acetate 85:15%) as a colourless liquid (82.9 mg, 0.89 mmol, 89%).

**<sup>1</sup>H NMR** (600 MHz, CDCl<sub>3</sub>)  $\delta$  6.77 – 6.73 (m, 2H), 6.68 – 6.63 (m, 2H), 3.75 (d, *J* = 0.7 Hz, 3H), 3.36 (s, 2H).

**<sup>13</sup>C NMR** (151 MHz, CDCl<sub>3</sub>)  $\delta$  153.00, 140.1, 116.6, 115.0, 55.9.

The spectroscopic data closely match the ones previously reported in the literature.<sup>21</sup>

**Phenyl ethyl sulfone 8f**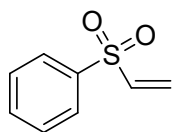

The title compound was synthesized according to the general procedure above. **7f** (168.23 mg, 1 mmol), **1** (455.8 mg, 2 mmol), Pd/C (3 mol %) and H<sub>2</sub>O (36  $\mu$ l, 2 mmol) were used, to afford **8f** after a short silica pad (SiO<sub>2</sub>/*n*-heptane:ethyl acetate 90:10%) as a white solid (102.14 mg, 0.60mmol, 60%).

**<sup>1</sup>H NMR** (600 MHz, CDCl<sub>3</sub>)  $\delta$  7.93 – 7.88 (m, 2H), 7.66 (td, *J* = 7.5, 1.4 Hz, 1H), 7.57 (t, *J* = 7.6 Hz, 2H), 3.11 (qd, *J* = 7.4, 1.2 Hz, 2H), 1.27 (td, *J* = 7.4, 1.2 Hz, 3H).

**<sup>13</sup>C NMR** (151 MHz, CDCl<sub>3</sub>)  $\delta$  138.7, 133.8, 129.4, 128.3, 50.7, 7.6.

The spectroscopic data closely match the ones previously reported in the literature.<sup>22</sup>

## 8. References

1. Flinker, M.; Yin, H.; Juhl, R. W.; Eikeland, E. Z.; Overgaard, J.; Nielsen, D. U.; Skrydstrup, T.; *Angew. Chem. Int. Ed.* **2017**, 56, 15910.
2. García-Muñoz, A.; Ortega-Arizmendi, A. I.; García-Carrillo M. A.; Díaz, E.; Gonzalez-Rivas, N.; Cuevas-Yañez, E.; *Synth.* **2012**, 44, 14, 2237-2242
3. Tanwar, L.; Börgel, J.; Ritter, T.; *J. Am. Chem. Soc.* **2019**, 141, 45, 17983-17988
4. <https://www.sigmaaldrich.com/IT/it/product/aldrich/232025>.
5. Wang, R.; Tang, Y.; Xu, M.; Meng, C.; Li F.; *J. Org. Chem.* **2018**, 83, 4, 2274-2281.
6. Shaikh, N. S.; Junge, K.; Beller, M.; *Org. Lett.* **2007**, 9, 26, 5429-5432.
7. Chojnacka, K.; Santoro S., Awartani, R.; Richards, N. G. J.; Himo, F.; Aponick, A.; *Org. Biomol. Chem.* **2011**, 9, 15, 5350-5353.
8. Shi, J.; Ray A. S.; Mathew, J. S.; Anderson, K. S.; Chu, C. K.; Schinazi, R. F.; *Bioorg. Med. Chem. Lett.* **2004**, 14, 9, 2159-2162.
9. Shahnaz, P.; Arfa, Y.; Muhammad, K. A.; Ahsana, D.; Rehana, J.; Amir, A.; *Lett. Drug Des. Discov.*, **2010**, 7, 1.
10. S. N., Khan; M. K., Zaman; R., Li; Z., Sun; *J. Org. Chem.* **2020**, 85, 7, 5019-5026.
11. N., Sakai; K., Kawana; R., Ikeda; Y., Nakaike; T., Konakahara; *Eur. J. Org. Chem.* **2011**, 17, 3178-3183.
12. Molander, G. A.; L. N., Cavalcanti; *J. Org. Chem.* **2011**, 76, 2, 623-630.
13. Song, H.-T.; Ding, W.; Zhou, Q.-Q.; Liu, J.; Lu, L.-Q.; Xiao, W.-J.; *J. Org. Chem.* **2016** 81, 16, 7250-7255.
14. V. K., Yu; A. Z., Kabdraissova; K. D., Praliyev; S. N., Shin; K. D., Berlin; *J. Saudi Chem. Soc.* **2009**, 13, 2, 209-217.

15. P., Wessig; K., Möllnitz; C., Eiserbeck; *Chem. Eur. J.* **2007**, 13, 17, 4859-4872.
16. K., Kamata; K., Yonehara; Y., Nakagawa; K., Uehara; N., Mizuno; *Nat. Chem.* **2010**, 2, 6, 478-483.
17. C.-P., Zhang; Z.-L., Wang; Q.-Y., Chen; C.-T., Zhang; Y.-C., Gu; J.-C., Xiao; *Chem. Comm.* **2011**, 47, 23, 6632-6634.
18. <https://scifinder-n.cas.org/searchDetail/substance/627a52f41ed5577845091638/substanceDetails>
19. T., Krüger; K., Vorndran; T., Linker; *Chem. Eur. J.* **2009**, 15, 44, 12082-12091.
20. K., Kamata; K., Yonehara; Y., Nakagawa; K., Uehara; N., Mizuno; *Nat. Chem.* **2010**, 2, 6, 478-483.
21. G.-Q., Kong; S., Ou; C., Zou; C.-D., Wu; *J. Am. Chem. Soc.* **2012**, 134, 48, 19851-19857.
22. S., Ahammed; A., Saha; B. C., Ranu; *J. Org. Chem.* **2011**, 76, 17, 7235-7239.

## 9. Green metrics calculations

### 9.1. Calculation of the Green Chemistry Metrics for the Mechanochemical Preparation of **8f**

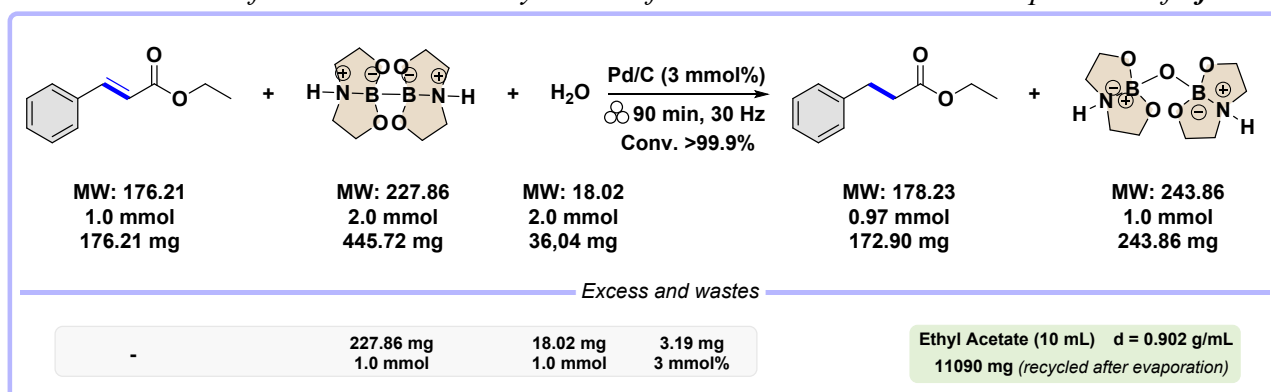

**Scheme S2.** Mechanochemical preparation of **8f**.

$$\text{Atom Economy} = \frac{\text{Mass of desired useful product}}{\text{Total Mass of all reactants}} \times 100 = \frac{178.23}{425.28} \times 100 = 41.91\%$$

$$\text{Environmental Factor} = \frac{\text{Mass of total waste}}{\text{Mass of desired product}} = \frac{227.86 + 18.02 + 3.19 + 11090}{172.90} = 65.58$$

$$\text{Environmental Factor} = \frac{\text{Mass of total waste}}{\text{Mass of desired product}} = \frac{227.86 + 18.02 + 3.19}{172.90} = 1.44$$

$$\text{Reaction Mass Efficiency} = \frac{\text{actual mass of desired product}}{\text{mass of reactants}} \times 100 = \frac{172.90}{176.21 + 445.72 + 36.04 + 3.19} \times 100 = 26.15\%$$

## 9.2. The Eco-scale Score for the Mechanochemical Preparation of **8f**

| Reagents |                      |                                    |             |        |         |         |         |          |        |        |
|----------|----------------------|------------------------------------|-------------|--------|---------|---------|---------|----------|--------|--------|
| Link     | identifier*          | name                               | MF*         | MW     | density | purity* | ml      | g        | mmoles | equiv. |
| 1        | <input type="text"/> | Ethyl trans-cinnamate              | C11H12O2    | 176.21 | 1.05    | 100%    | NaN     | 0.17621  | 1      | 1      |
| 2        | <input type="text"/> | (2,2'-Bi(1,3,6,2-dioxazaborocane)) | C8H18B2N2O4 | 227.86 |         | 100%    | 0       | 0.45572  | 2      | 2      |
| 3        | <input type="text"/> | H2O                                | H2O         | 18.02  | 1       | 100%    | 0.03604 | 0.03604  | 2      | 2      |
| 4        | <input type="text"/> | Palladium on activated carbon      | Pd          | 106.42 |         | 100%    | 0       | 0.003193 | 0.03   | 0.03   |

  

| Products             |                          |          |           |        |              |          |         |  |  |  |
|----------------------|--------------------------|----------|-----------|--------|--------------|----------|---------|--|--|--|
| identifier*          | name                     | MF*      | MW        | g      | mmoles       | g theor  | yield   |  |  |  |
| <input type="text"/> | Ethyl 3-phenylpropionate | C11H14O2 | 178.23096 | 0.1729 | 0.9700895961 | 0.178231 | 97.0089 |  |  |  |

  

| Conditions              |                                                                                                                      |        |      |     |        |                                         |
|-------------------------|----------------------------------------------------------------------------------------------------------------------|--------|------|-----|--------|-----------------------------------------|
| Reagents                | Name                                                                                                                 | mmoles | eq.  | Bp  | Hazard | Price                                   |
|                         | Ethyl trans-cinnamate                                                                                                | 5.78   | 1    | 247 |        |                                         |
|                         | (2,2'-Bi(1,3,6,2-dioxazaborocane))                                                                                   | 11.56  | 2    |     |        |                                         |
|                         | H2O                                                                                                                  | 11.56  | 2    |     |        |                                         |
|                         | Palladium on activated carbon                                                                                        | 0.17   | 0.03 |     |        |                                         |
| Yield                   |                                                                                                                      |        |      |     |        | 97                                      |
| Price / availability    |                                                                                                                      |        |      |     |        | -1                                      |
| Safety                  |                                                                                                                      |        |      |     |        | -15                                     |
| Technical setup         | Possible items: Common set-up, Instruments for controlled addition of chemicals, Unconventional activation technique |        |      |     |        | Selected items: Common set-up           |
| Temperature / time      | Possible items: Room temperature, < 1h, Room temperature, < 24h, Heating, < 1h                                       |        |      |     |        | Selected items: Room temperature, < 24h |
| Workup and purification | Possible items: Sublimation, Liquid - liquid extraction or washing, Classical chromatography                         |        |      |     |        | Selected items: Adding solvent          |
| EcoScale                |                                                                                                                      |        |      |     |        | 68                                      |

<sup>a</sup>Values calculated using the eco scale calculator software available at the link:  
<http://ecoscale.cheminfo.org/calculator>

9.3. Calculation of the Green Chemistry Metrics for the In-solution Preparation of **8f**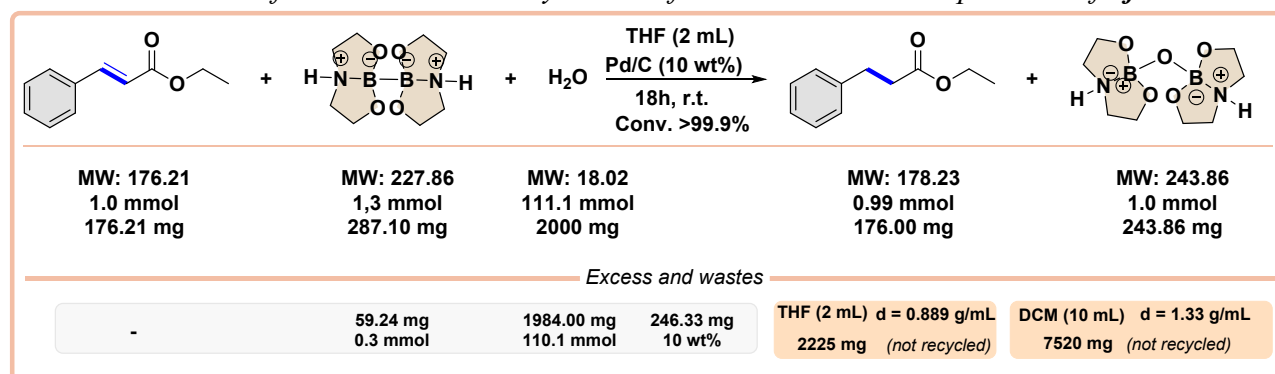Scheme S3. In-solution\* preparation of **8f**.

\*Flinker, M.; Yin, H.; Juhl, R. W.; Eikeland, E. Z.; Overgaard, J.; Nielsen, D. U.; Skrydstrup, T.; *Angew. Chem. Int. Ed.* **2017**, 56, 15910.

$$\text{Atom Economy} = \frac{\text{Mass of desired useful product}}{\text{Total Mass of all reactants}} \times 100 = \frac{178.23}{425.28} \times 100 = 41.91\%$$

$$\begin{aligned} \text{Environmental Factor} &= \frac{\text{Mass of total waste}}{\text{Mass of desired product}} \\ &= \frac{59.24 + 1984.00 + 246.33 + 2225.00 + 7520.00}{176.00} = 69.60 \end{aligned}$$

$$\frac{\text{actual mass of desired product}}{\text{mass of reactants}} \times 100 = \frac{172.90}{176.21 + 287.10 + 2000.00 + 246.3} \times 100 = 6.38\%$$

#### 9.4. The Eco-scale Score for the in-solution preparation of **8f**

| Reagents                                 |             |                                    |             |          |         |         |     |          |              |              |
|------------------------------------------|-------------|------------------------------------|-------------|----------|---------|---------|-----|----------|--------------|--------------|
| <input checked="" type="checkbox"/> Link |             |                                    |             |          |         |         |     |          |              |              |
|                                          | identifier* | name                               | MF*         | MW       | density | purity* | ml  | g        | mmoles       | equiv.       |
| 1                                        |             | Ethyl trans-cinnamate              | C11H12O2    | 176.21   | 1.05    | 100%    | NaN | 0.088105 | 0.5          | 1            |
| 2                                        |             | (2,2'-Bi(1,3,6,2-dioxazaborocane)) | C8H18B2N2O4 | 227.86   |         | 100%    | 0   | 0.143552 | 0.63         | 1.26         |
| 3                                        |             | H2O                                | H2O         | 18.02    | 1       | 100%    | 2   | 2        | 110.98779134 | 221.97558268 |
| 4                                        |             | Palladium on activated carbon      | Pd          | 106.42   |         | 100%    | 0   | 0.4      | 3.758691975  | 7.5173839505 |
| 5                                        |             | Tetrahydrofuran                    | C4H8O       | 72.10692 | 0.88    | 100%    | 2   | 1.76     | 24.40819827  | 48.81639654  |

  

| Products     |                          |          |           |       |              |          |         |
|--------------|--------------------------|----------|-----------|-------|--------------|----------|---------|
| identifier*: | name:                    | MF*:     | MW:       | g:    | mmoles:      | g theor: | yield:  |
|              | Ethyl 3-phenylpropionate | C11H14O2 | 178.23096 | 0.088 | 0.4937413791 | 0.089115 | 98.7488 |

  

| Conditions                                            |                                       |        |     |        |       |  |
|-------------------------------------------------------|---------------------------------------|--------|-----|--------|-------|--|
| Reagents                                              |                                       |        |     |        |       |  |
| Name                                                  | mmoles                                | eq.    | Bp  | Hazard | Price |  |
| Ethyl trans-cinnamate                                 | 5.68                                  | 1      | 247 |        |       |  |
| (2,2'-Bi(1,3,6,2-dioxazaborocane))                    | 7.15                                  | 1.26   |     |        |       |  |
| H2O                                                   | 1261.22                               | 221.97 |     |        |       |  |
| Palladium on activated carbon                         | 42.71                                 | 7.51   |     |        |       |  |
| Tetrahydrofuran                                       | 277.36                                | 48.81  | 66  |        |       |  |
| Yield <input type="text" value="99"/>                 |                                       |        |     |        |       |  |
| Price / availability <input type="text" value="-23"/> |                                       |        |     |        |       |  |
| Safety <input type="text" value="-20"/>               |                                       |        |     |        |       |  |
| Technical setup                                       |                                       |        |     |        |       |  |
| Possible items                                        | Selected items                        |        |     |        |       |  |
| Any additional special glassware                      | (Inert) gas atmosphere                |        |     |        |       |  |
| (Inert) gas atmosphere                                | Any additional special glassware      |        |     |        |       |  |
| Glove box                                             | Glove box                             |        |     |        |       |  |
| Temperature / time                                    |                                       |        |     |        |       |  |
| Possible items                                        | Selected items                        |        |     |        |       |  |
| Heating, > 1h                                         | Room temperature, < 24h               |        |     |        |       |  |
| Cooling, > 0°C                                        |                                       |        |     |        |       |  |
| Cooling, < 0°C                                        |                                       |        |     |        |       |  |
| Workup and purification                               |                                       |        |     |        |       |  |
| Possible items                                        | Selected items                        |        |     |        |       |  |
| Sublimation                                           | Adding solvent                        |        |     |        |       |  |
| Liquid - liquid extraction or washing                 | Simple filtration                     |        |     |        |       |  |
| Classical chromatography                              | Liquid - liquid extraction or washing |        |     |        |       |  |
| EcoScale <input type="text" value="47"/>              |                                       |        |     |        |       |  |

Values calculated using the eco scale calculator software available at the link:  
<http://ecoscale.cheminfo.org/calculator>

## 10. Spectra

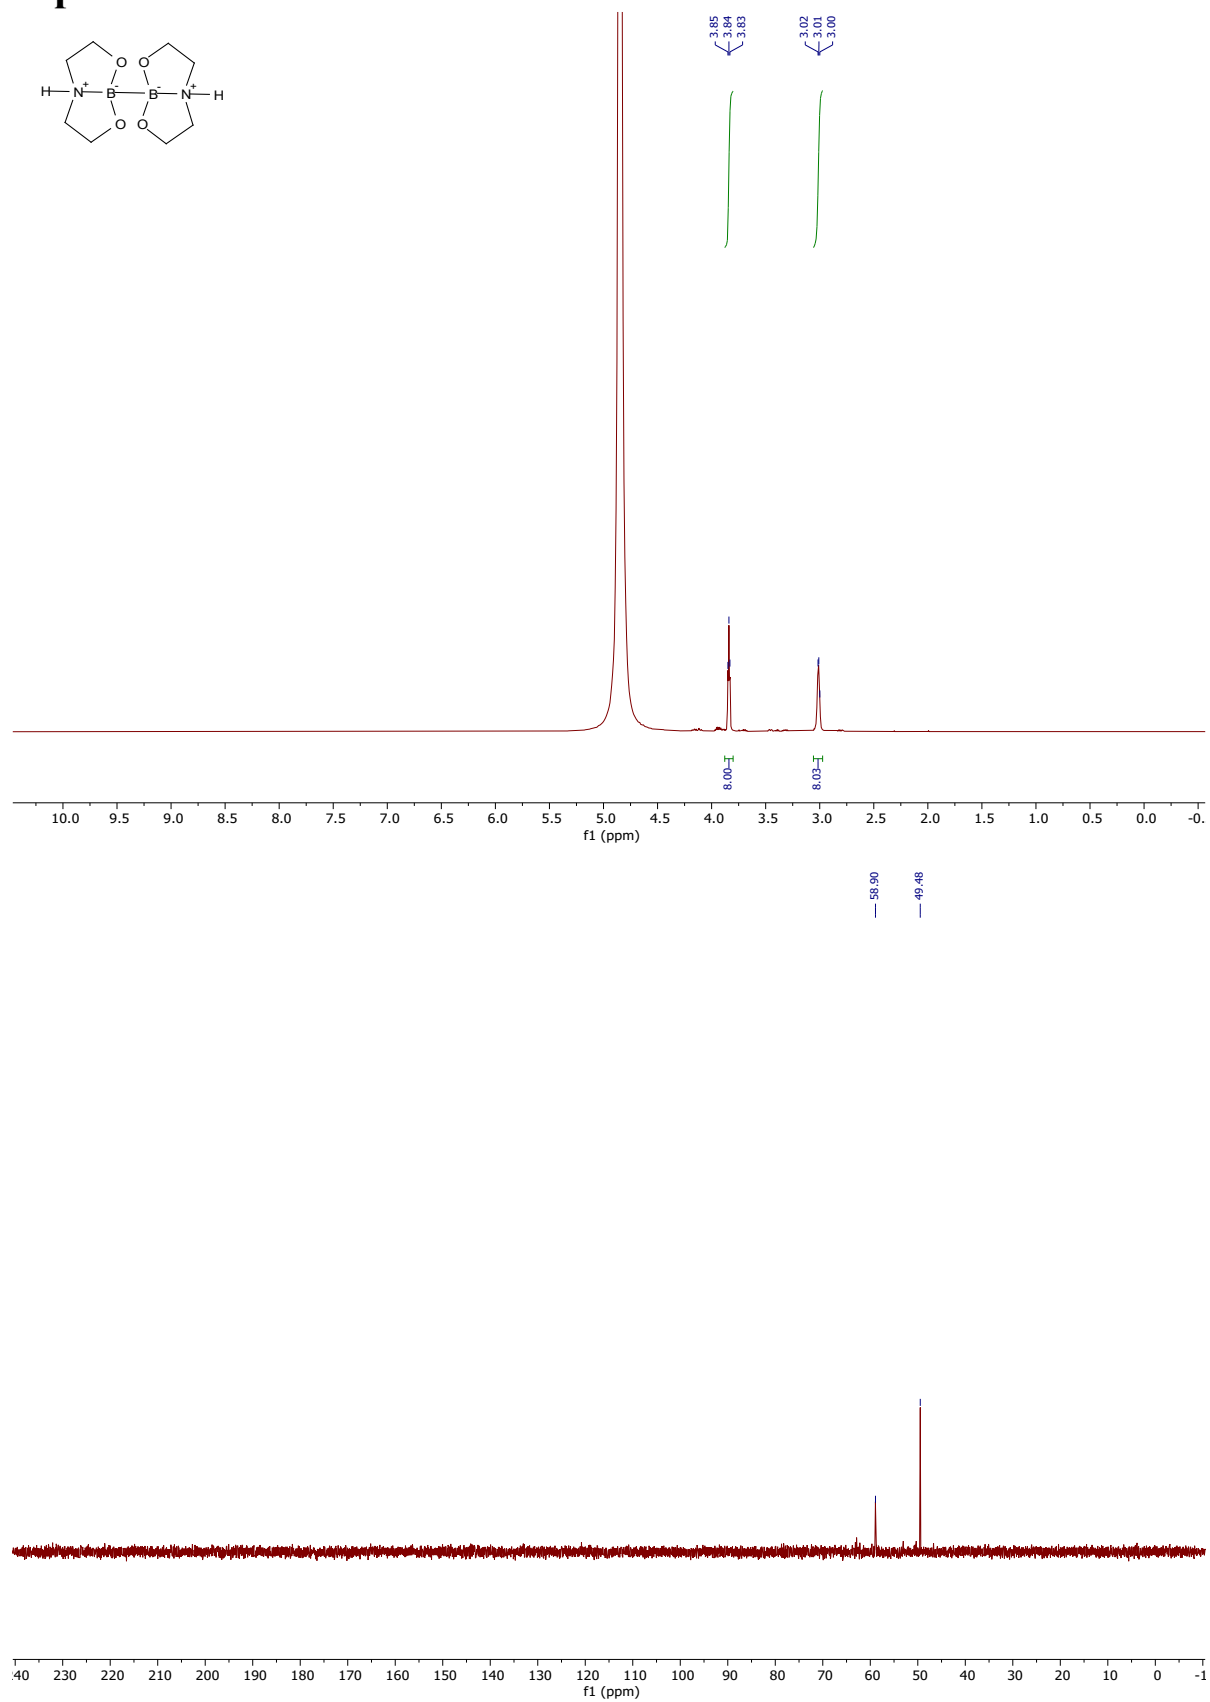

S36

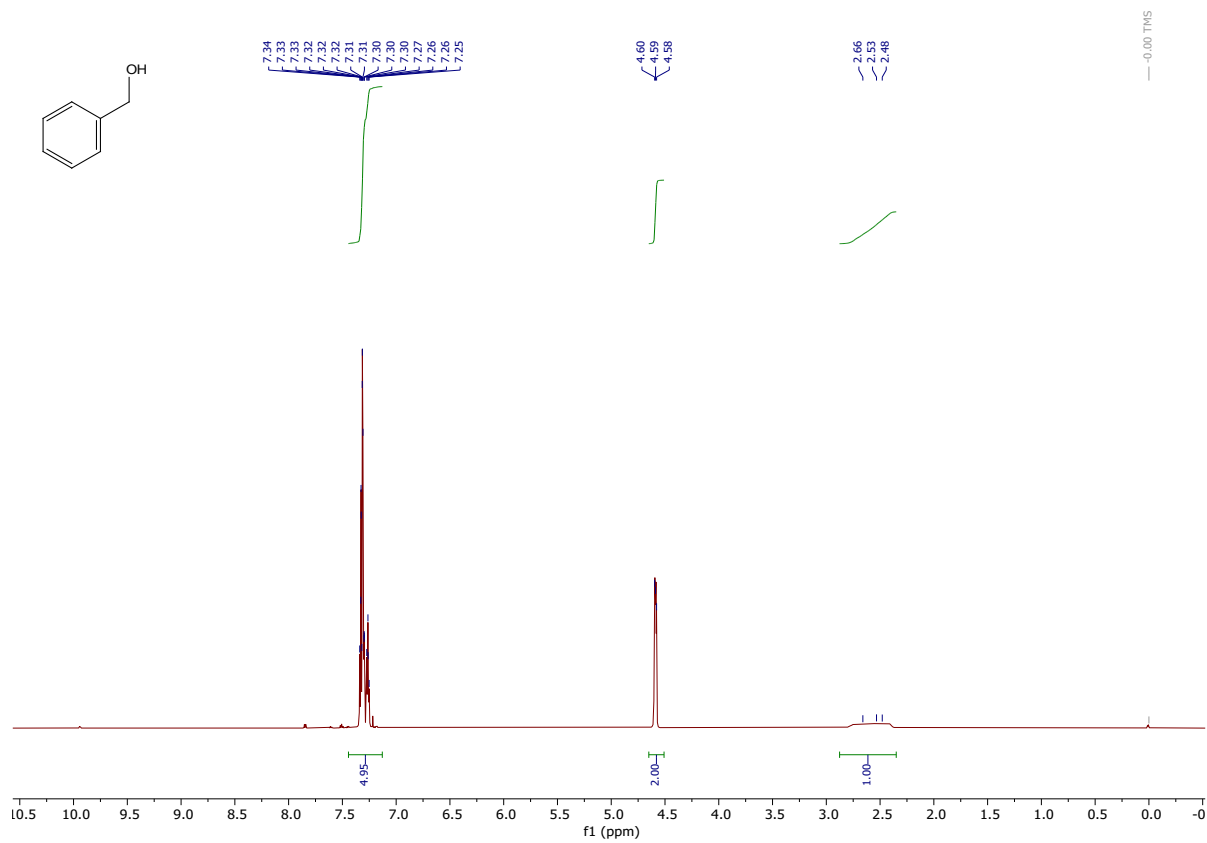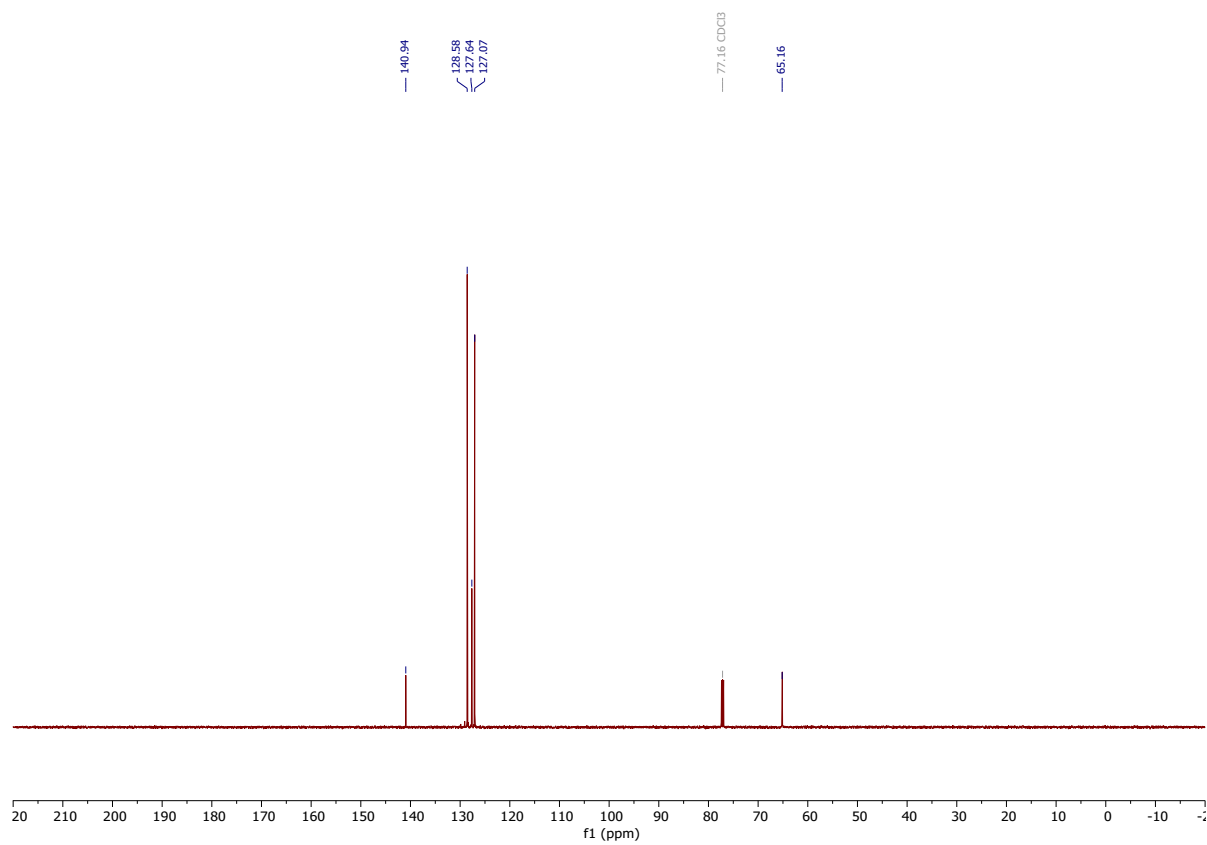

S37

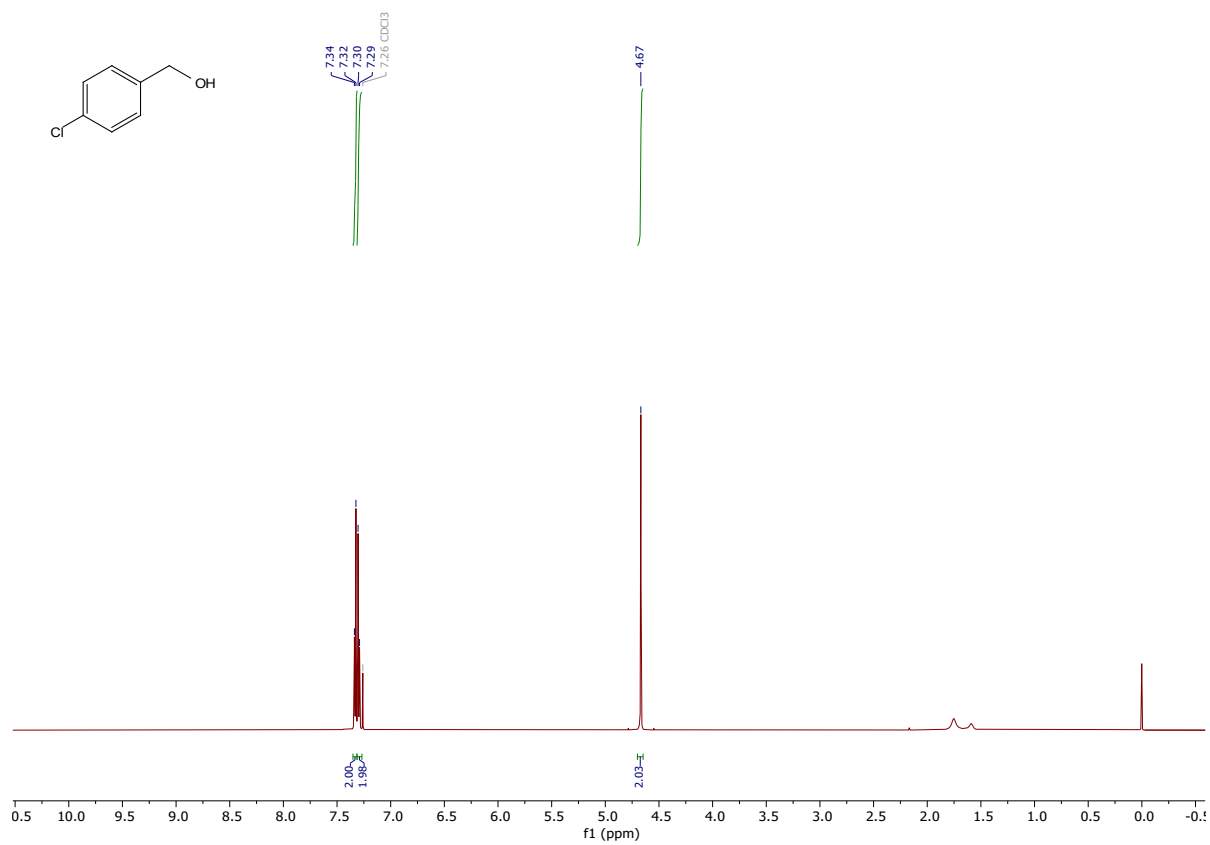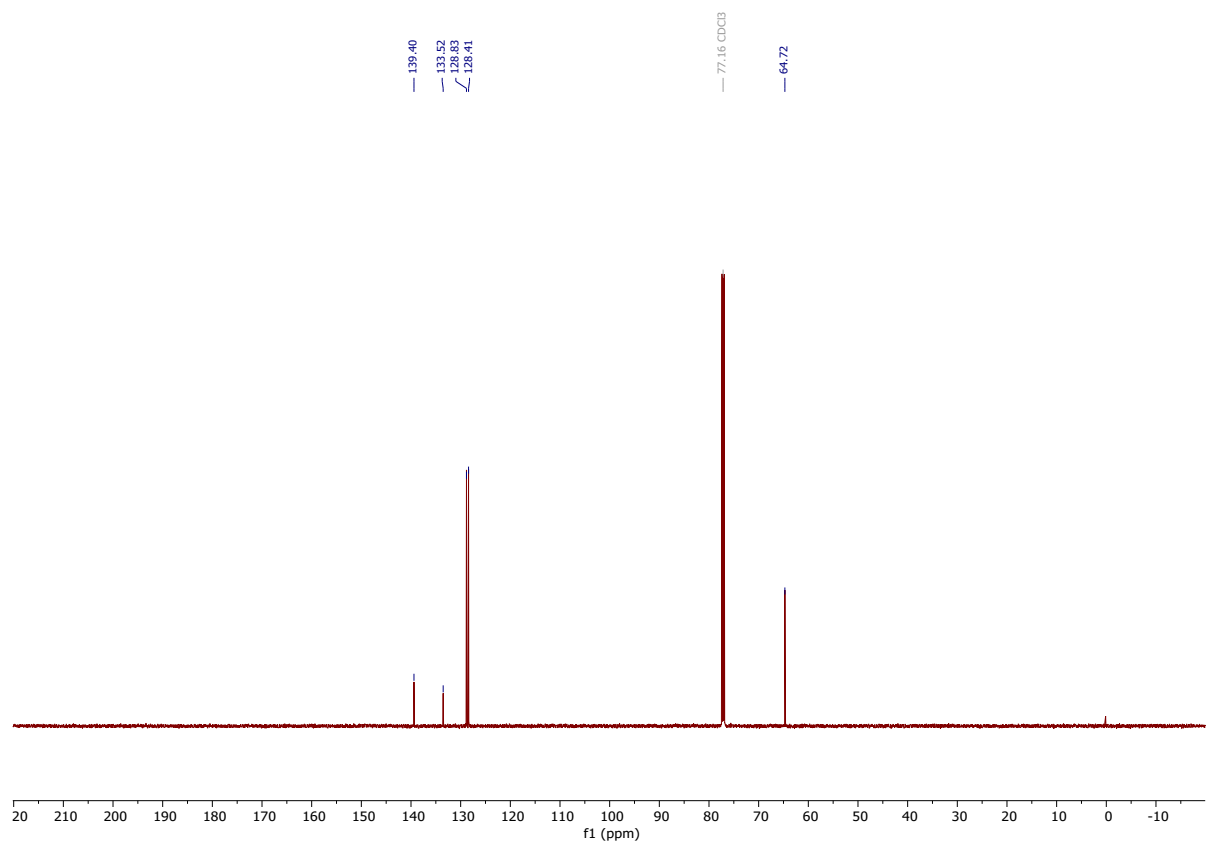

S38

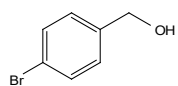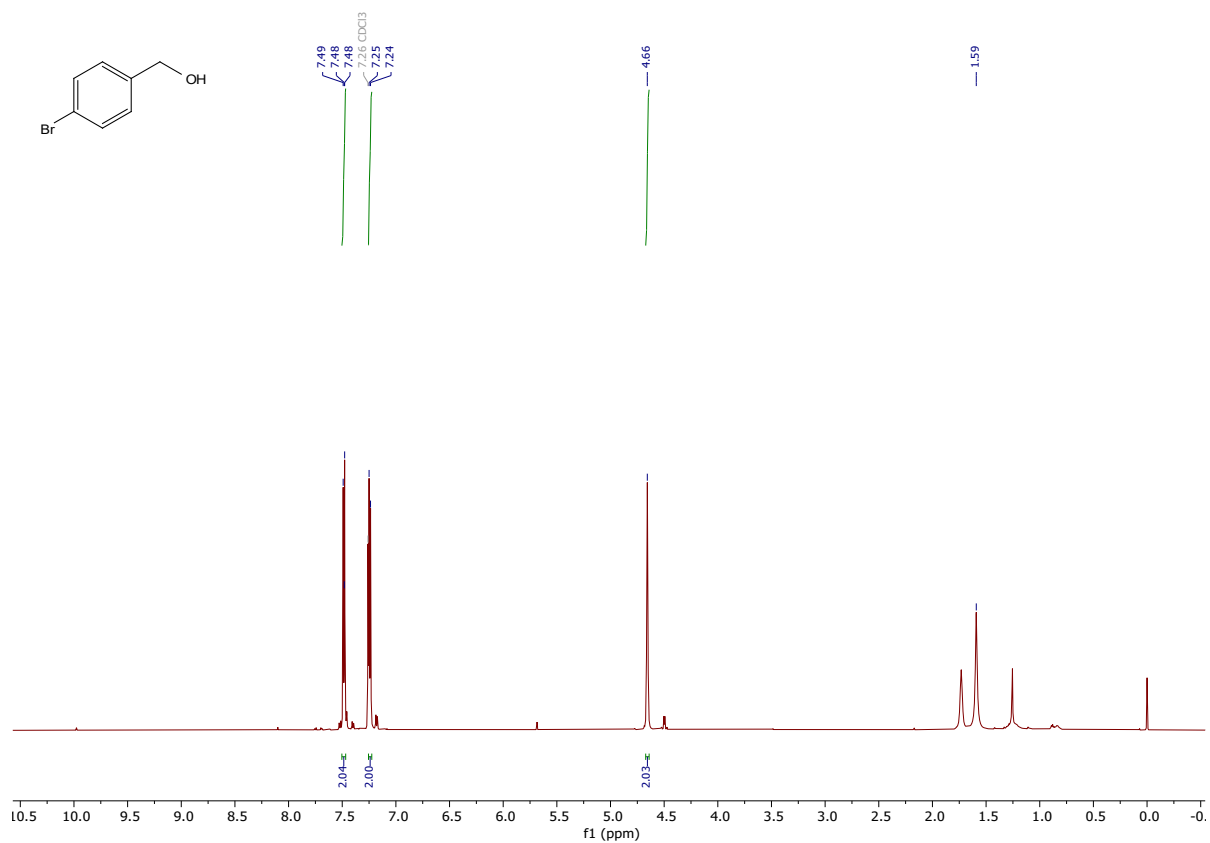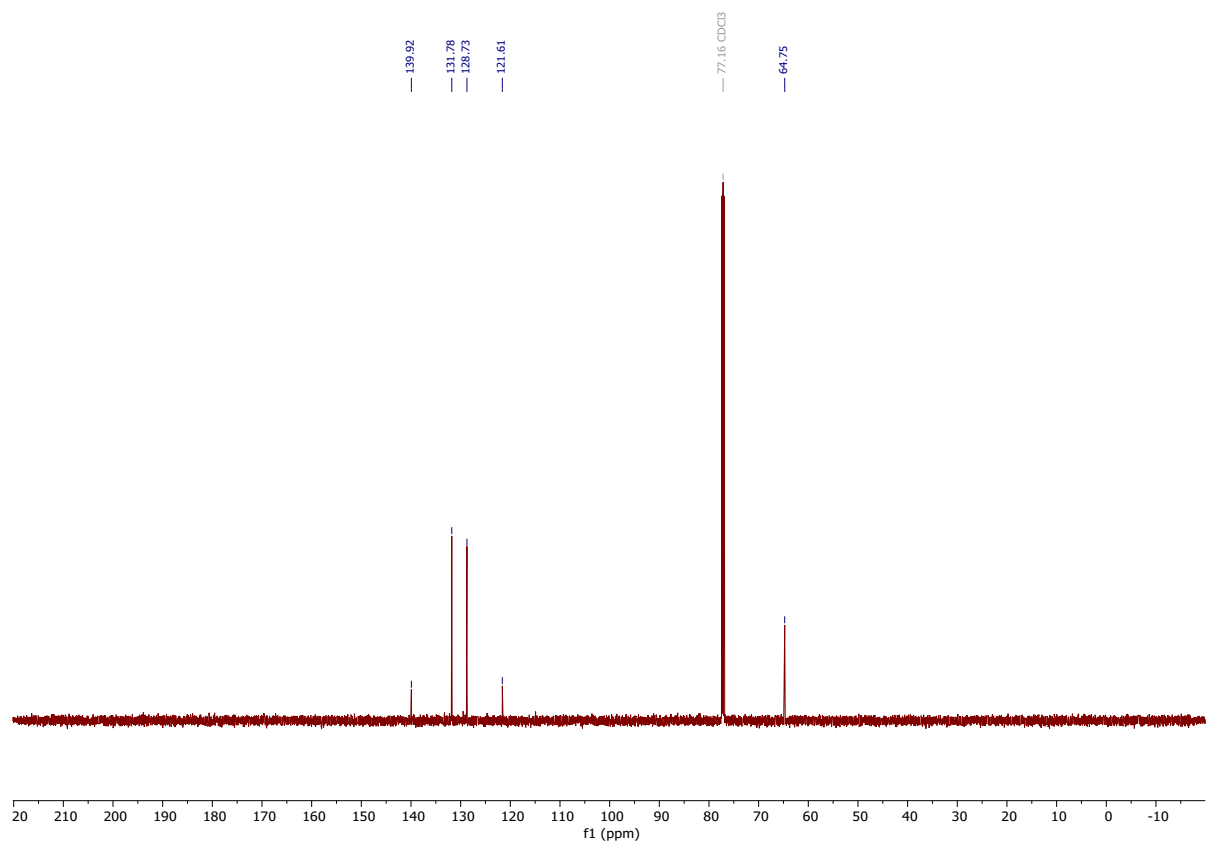

S39

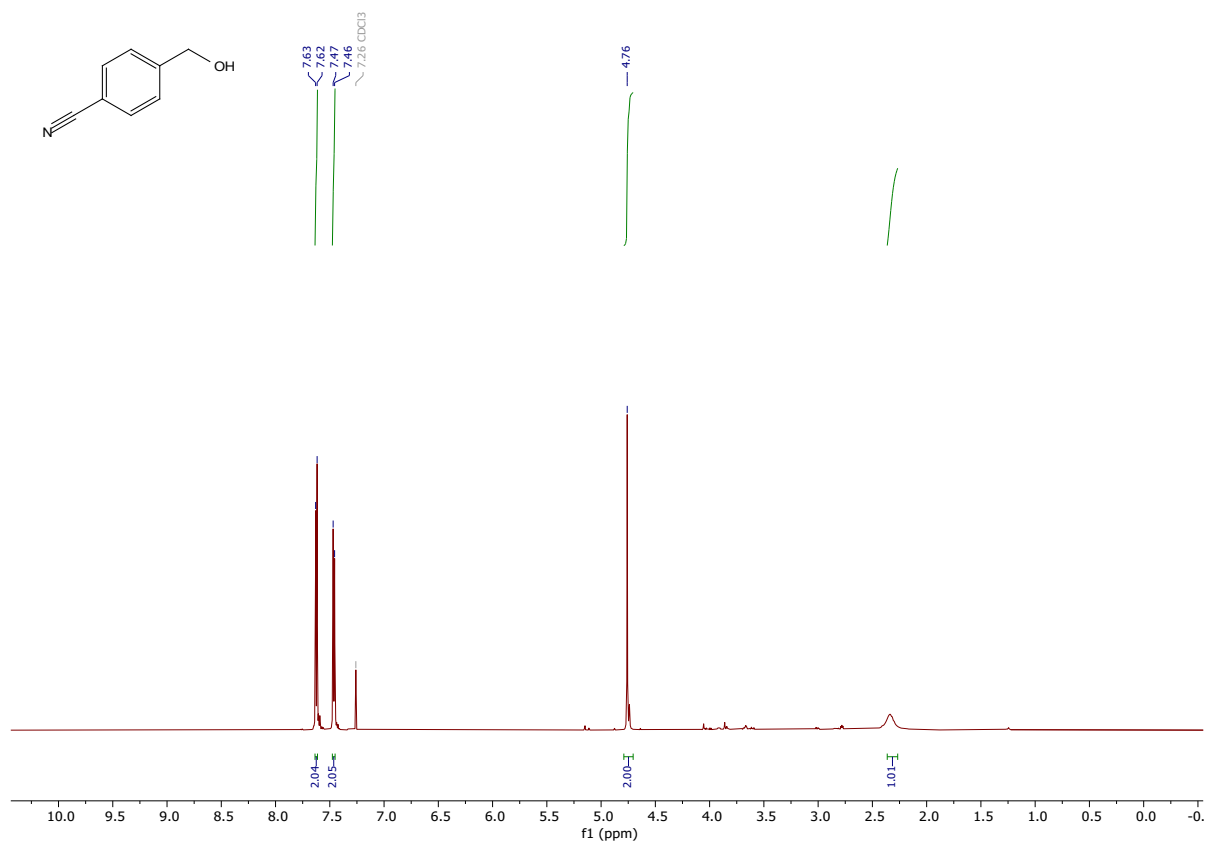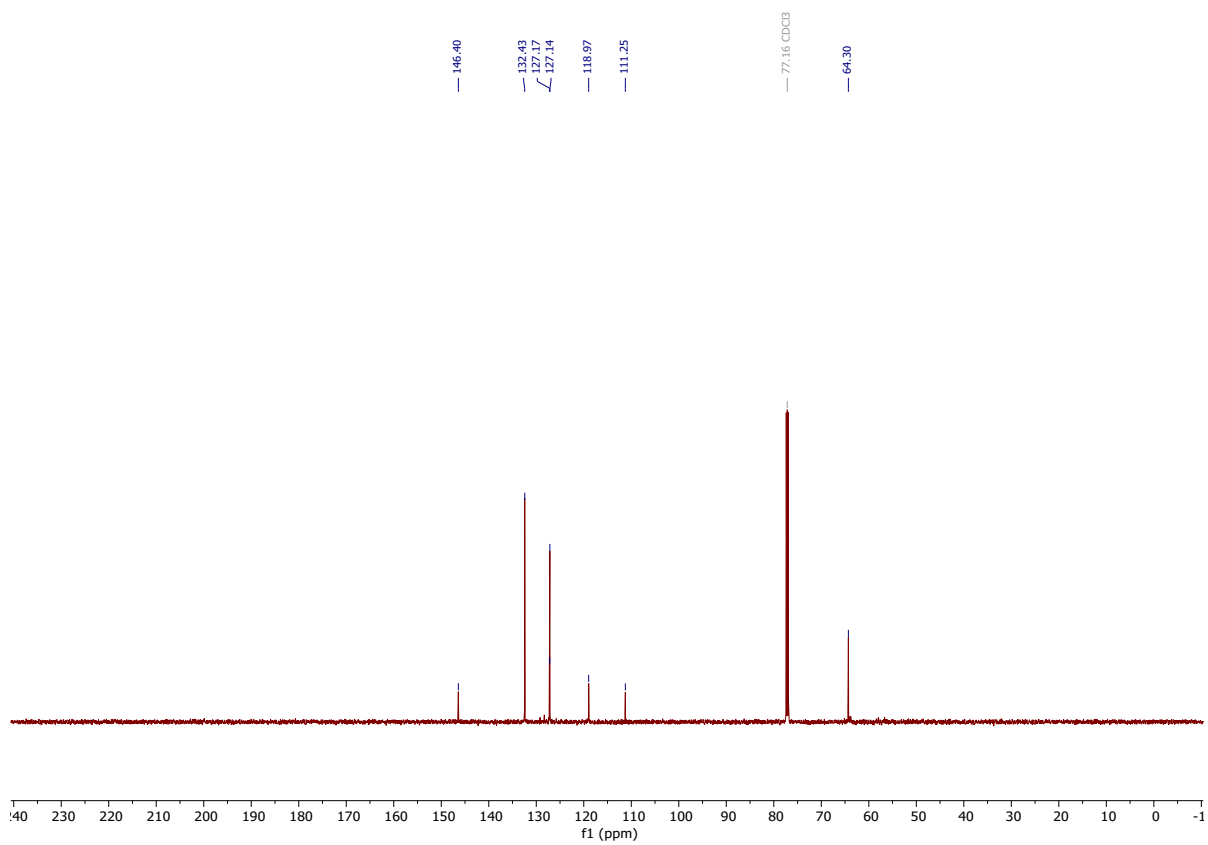

S40

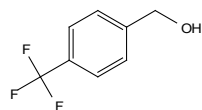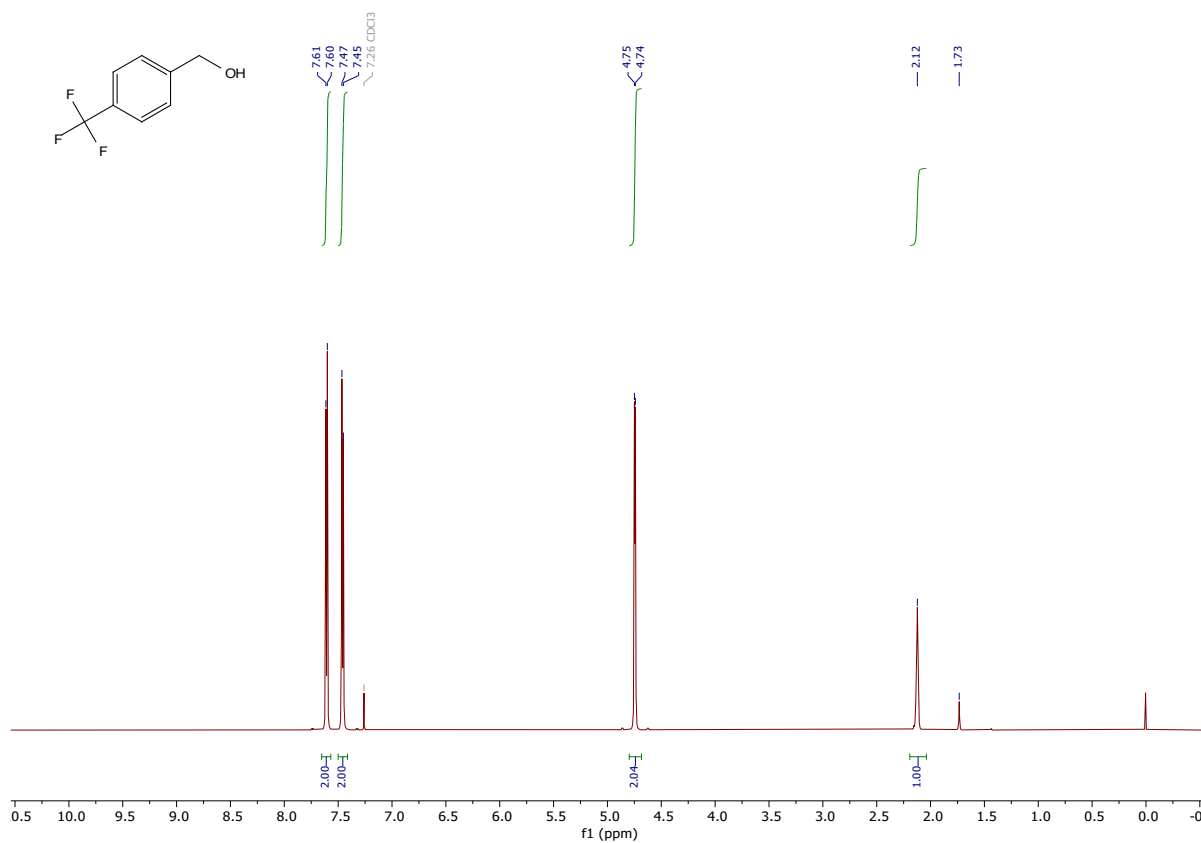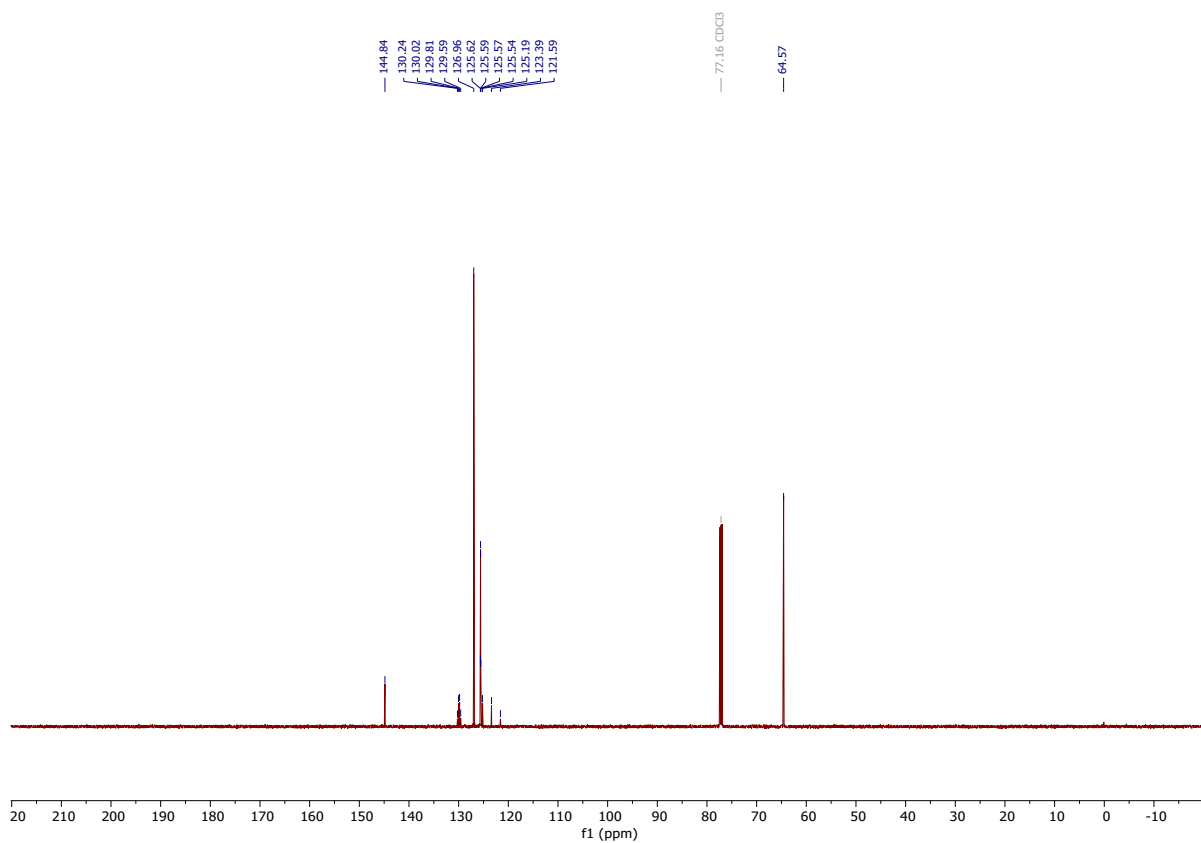

**S41**

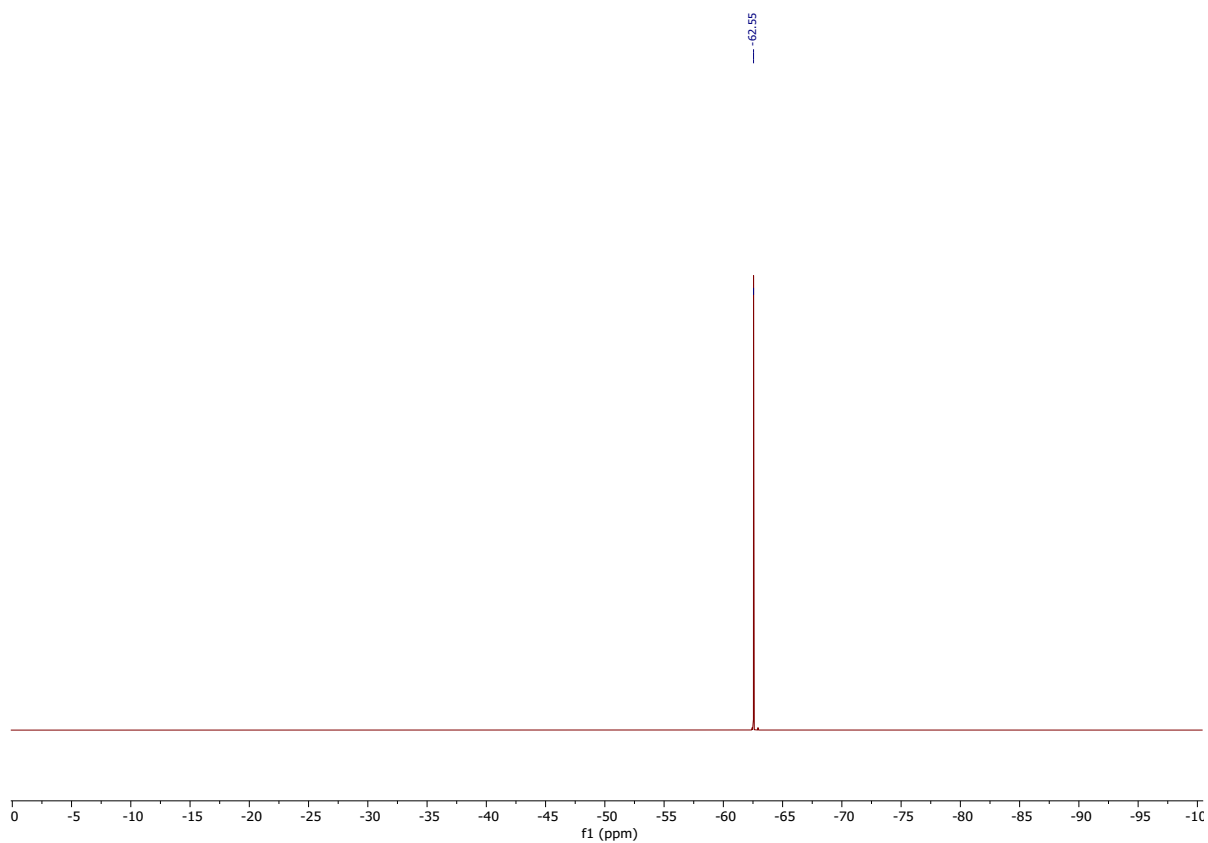

S42

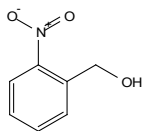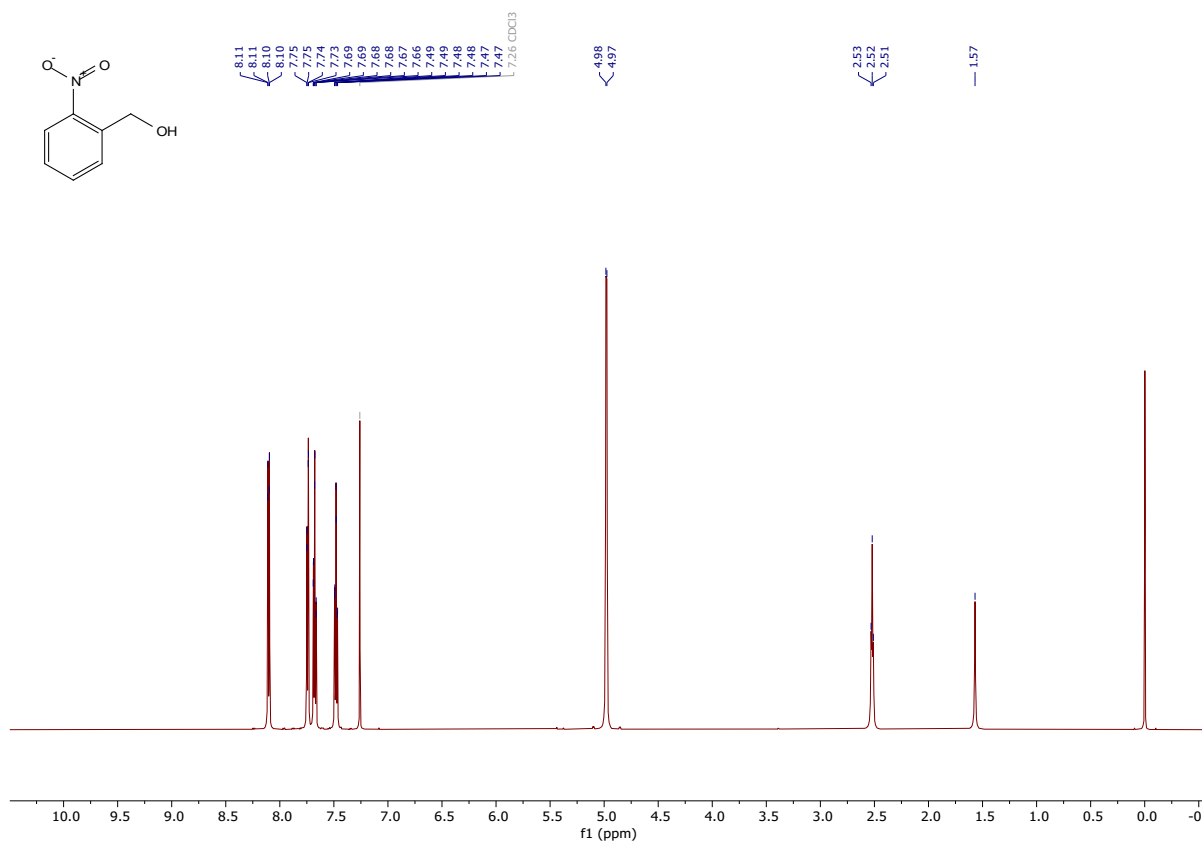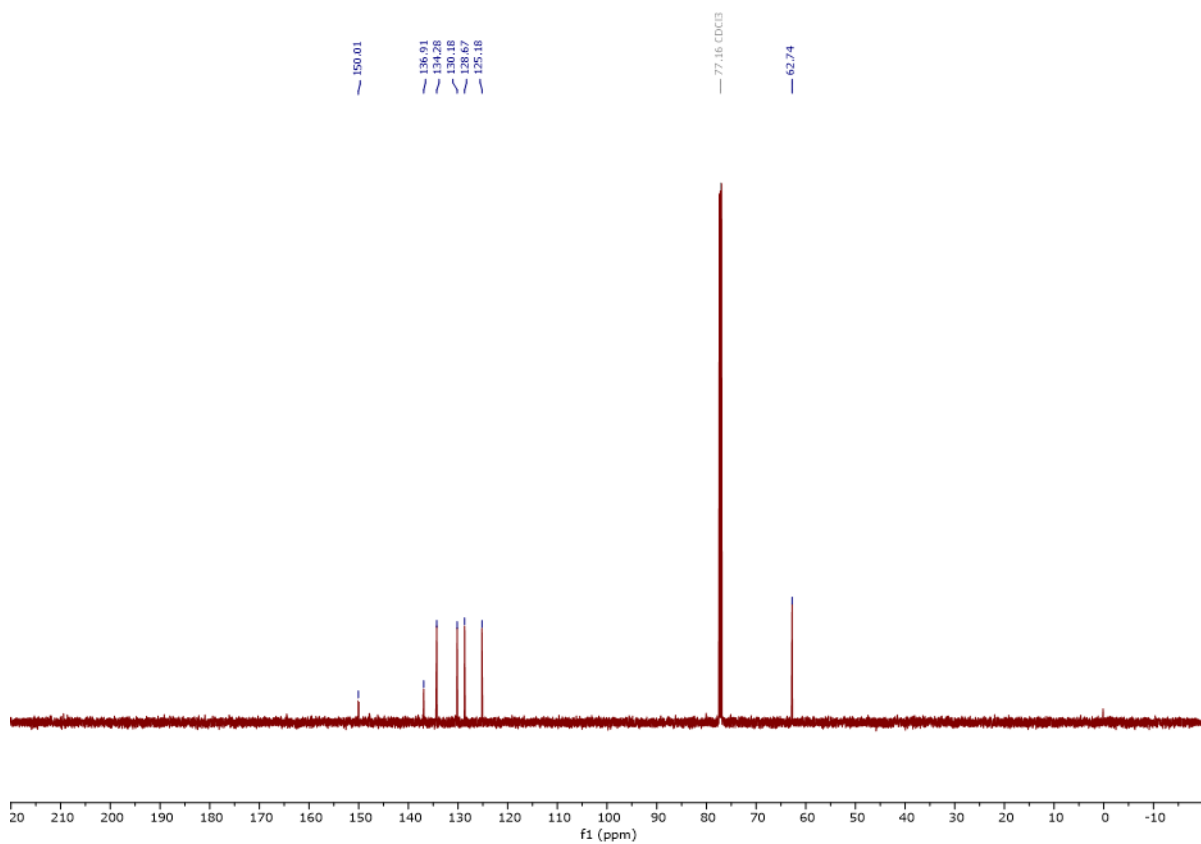

S43

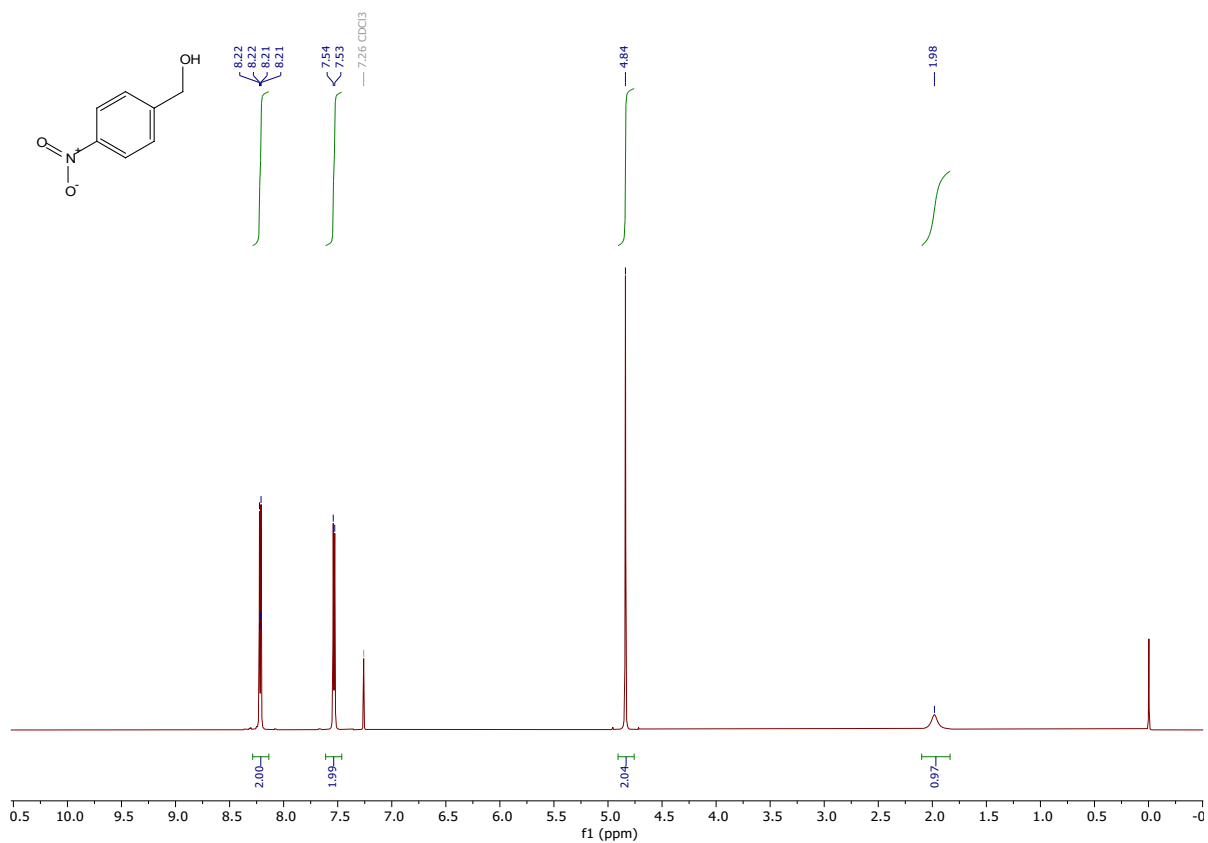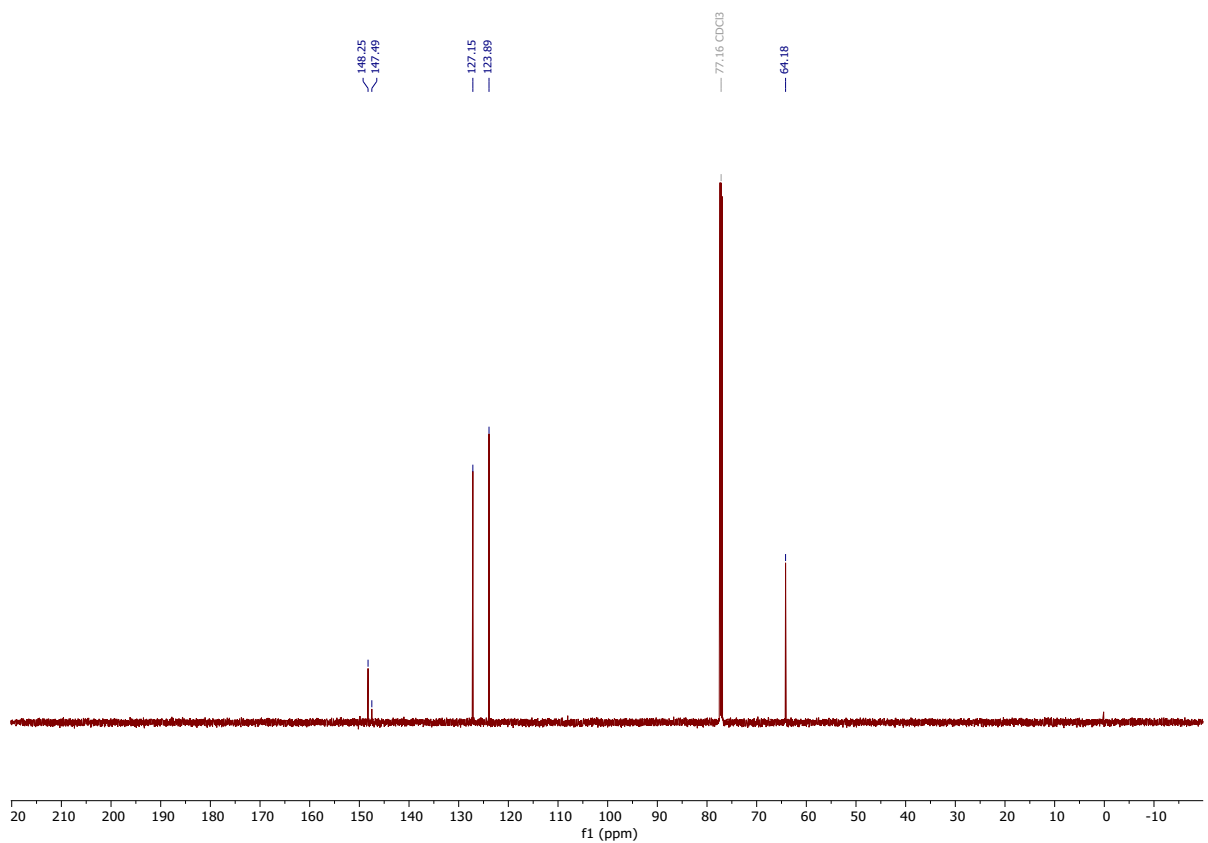

S44

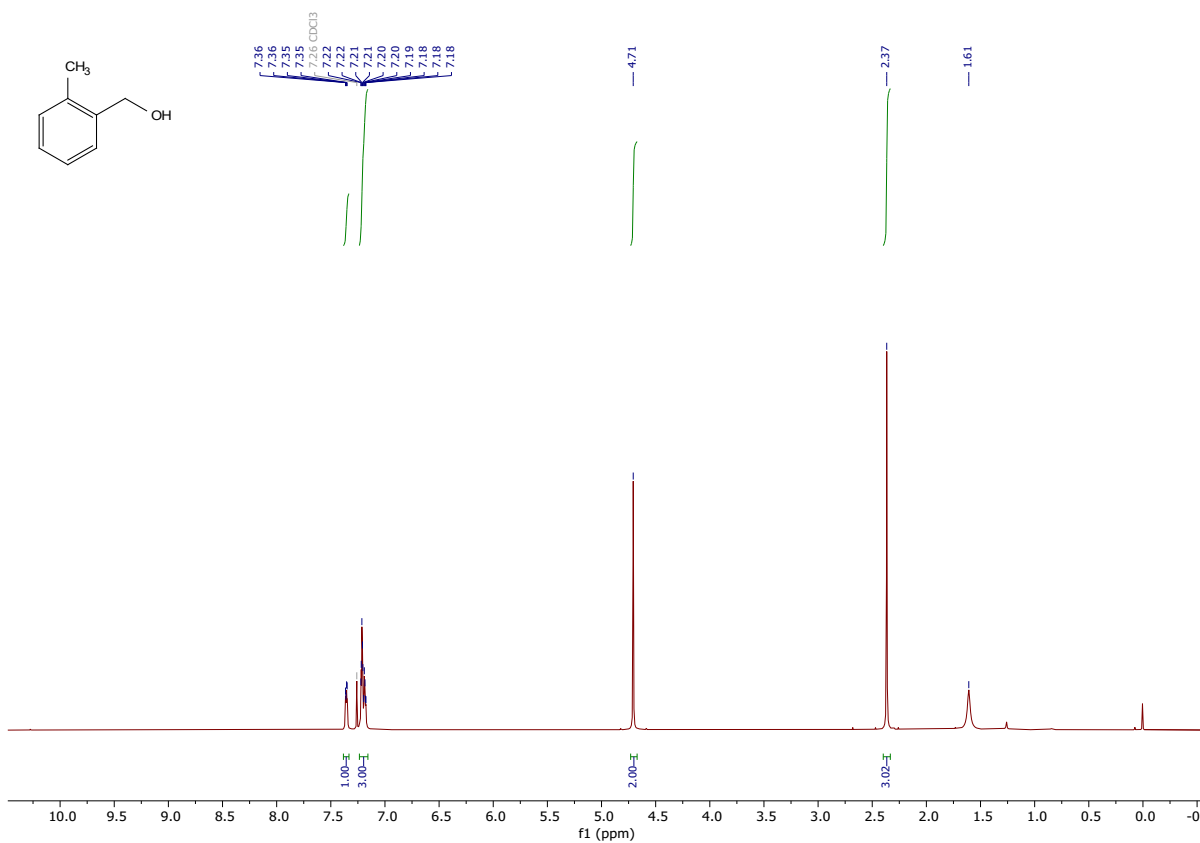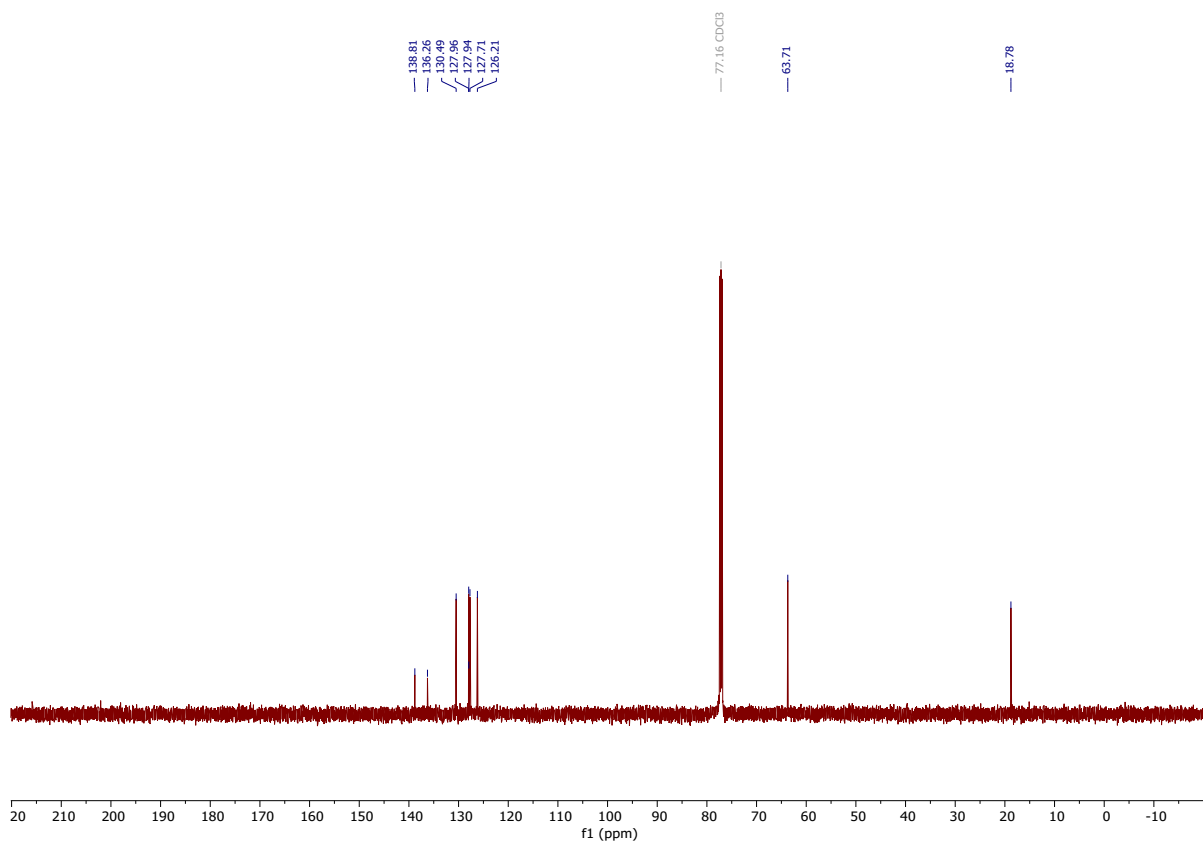

S45

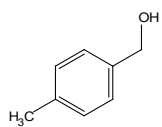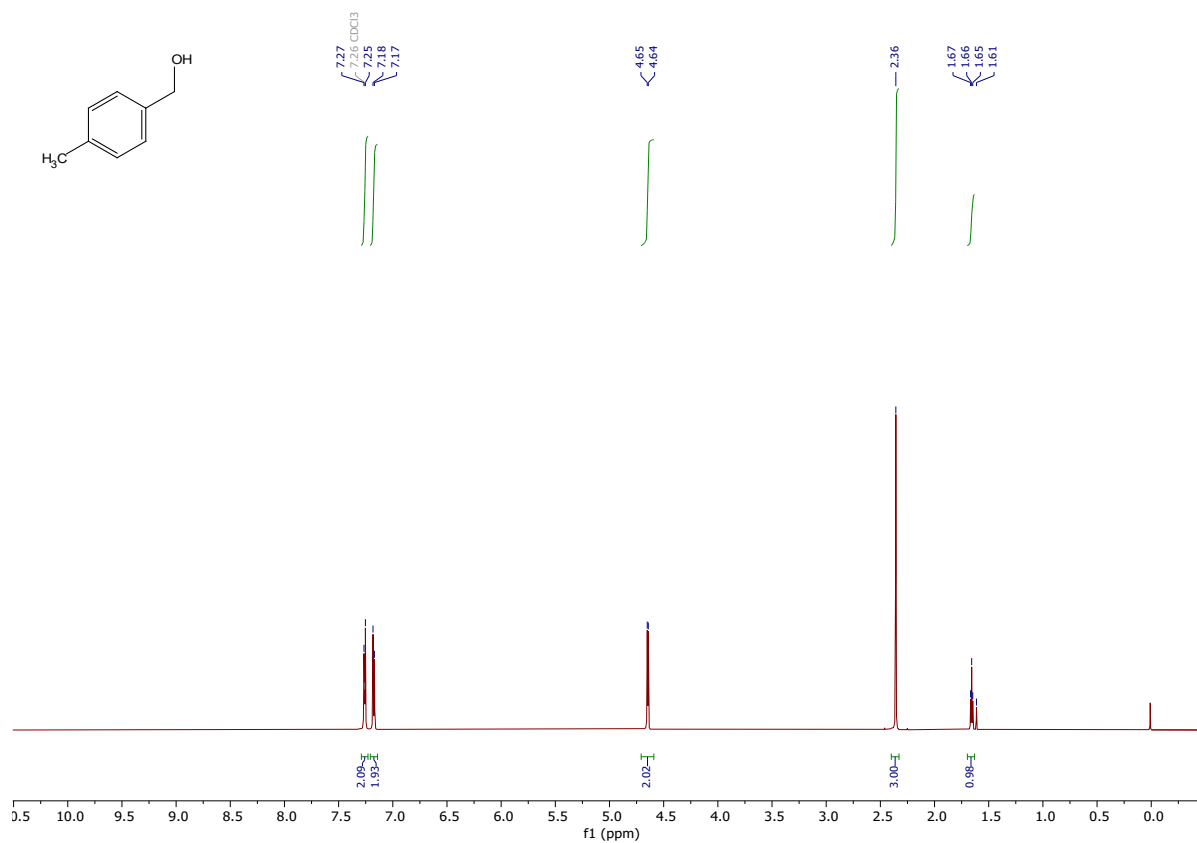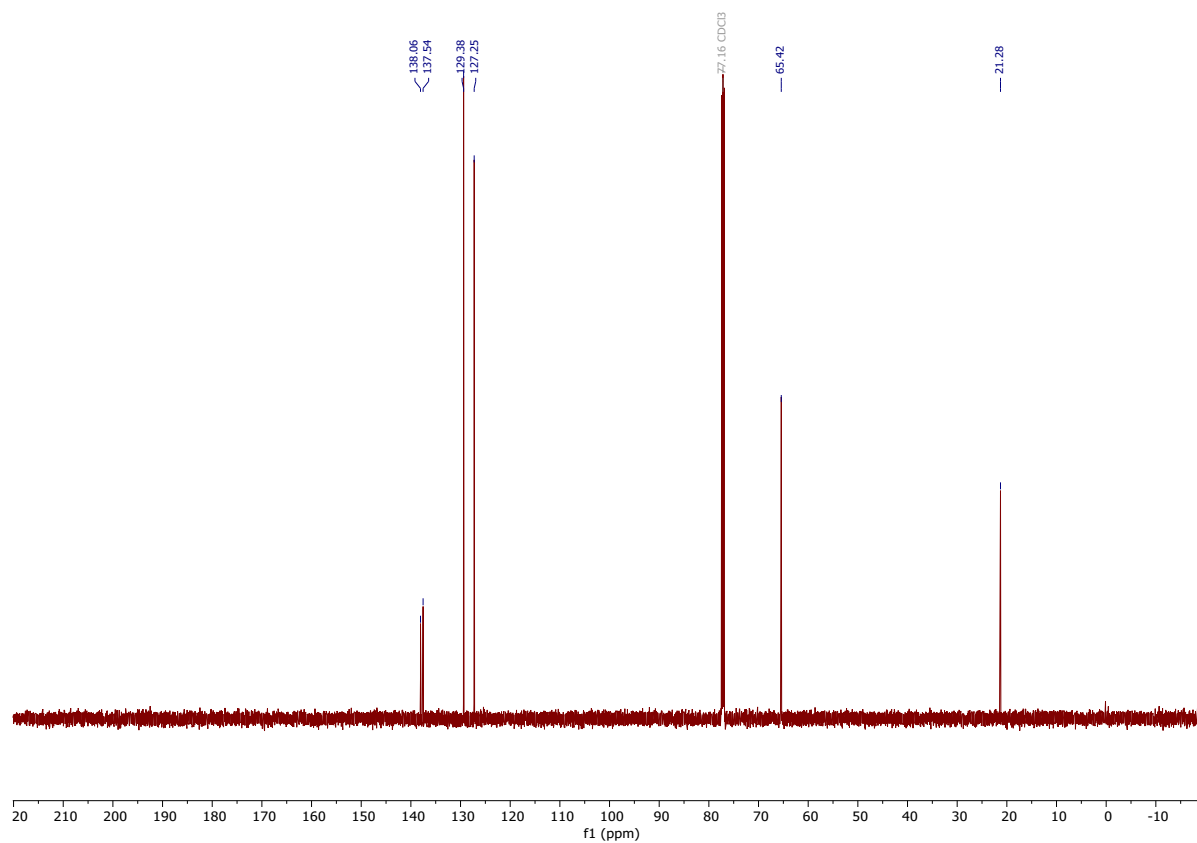

S46

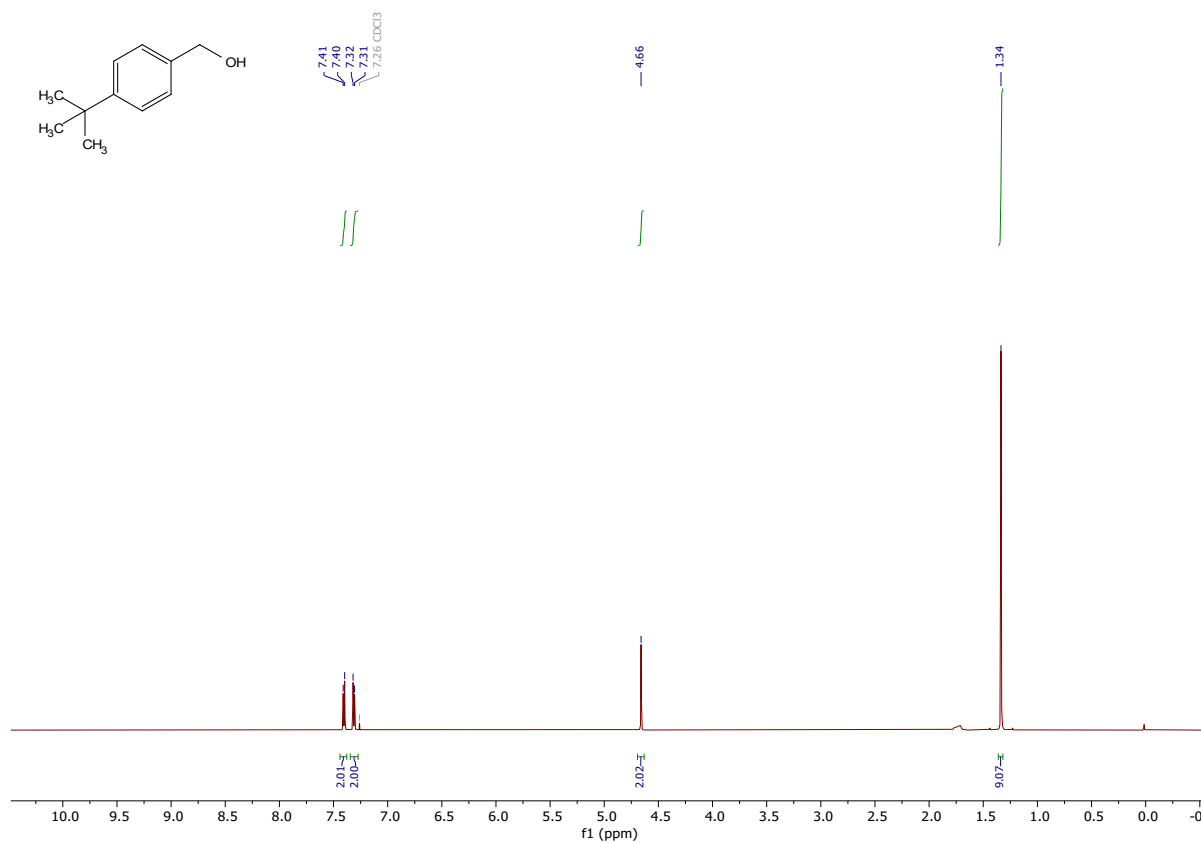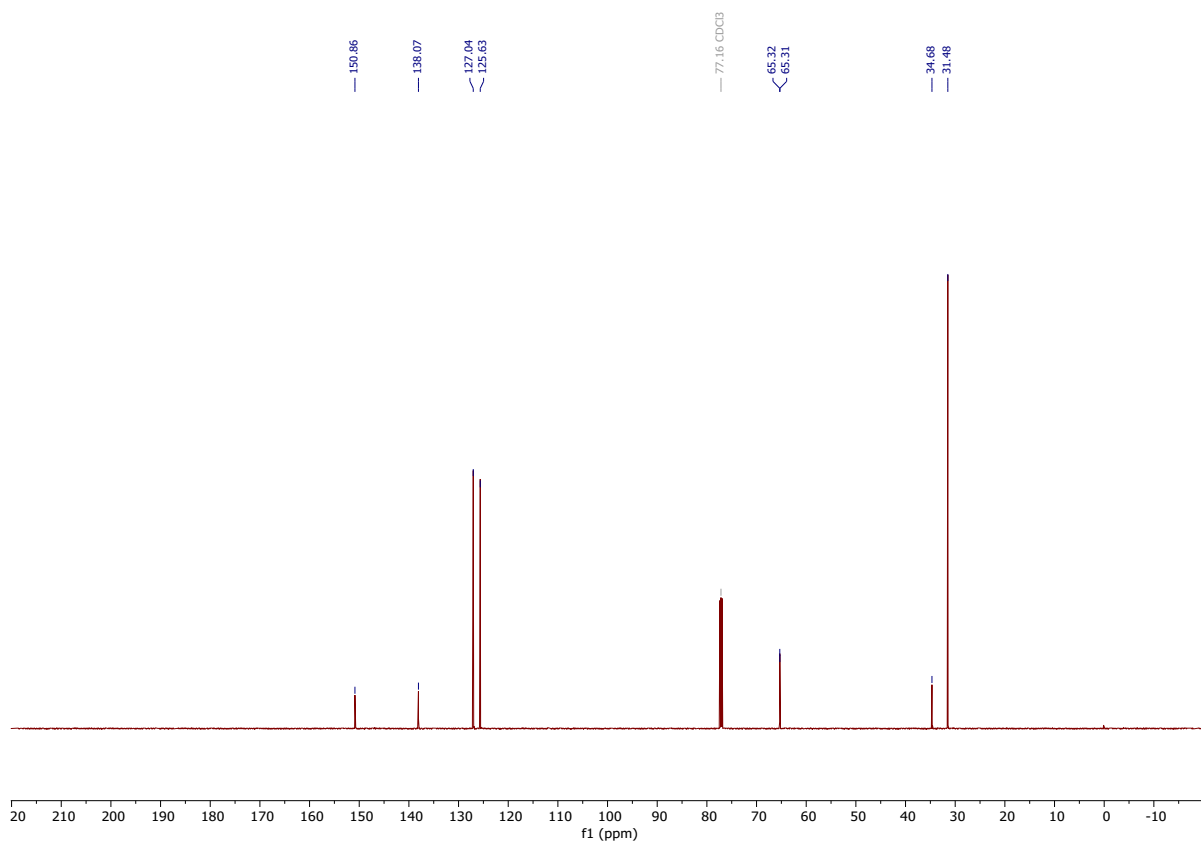

S47

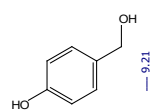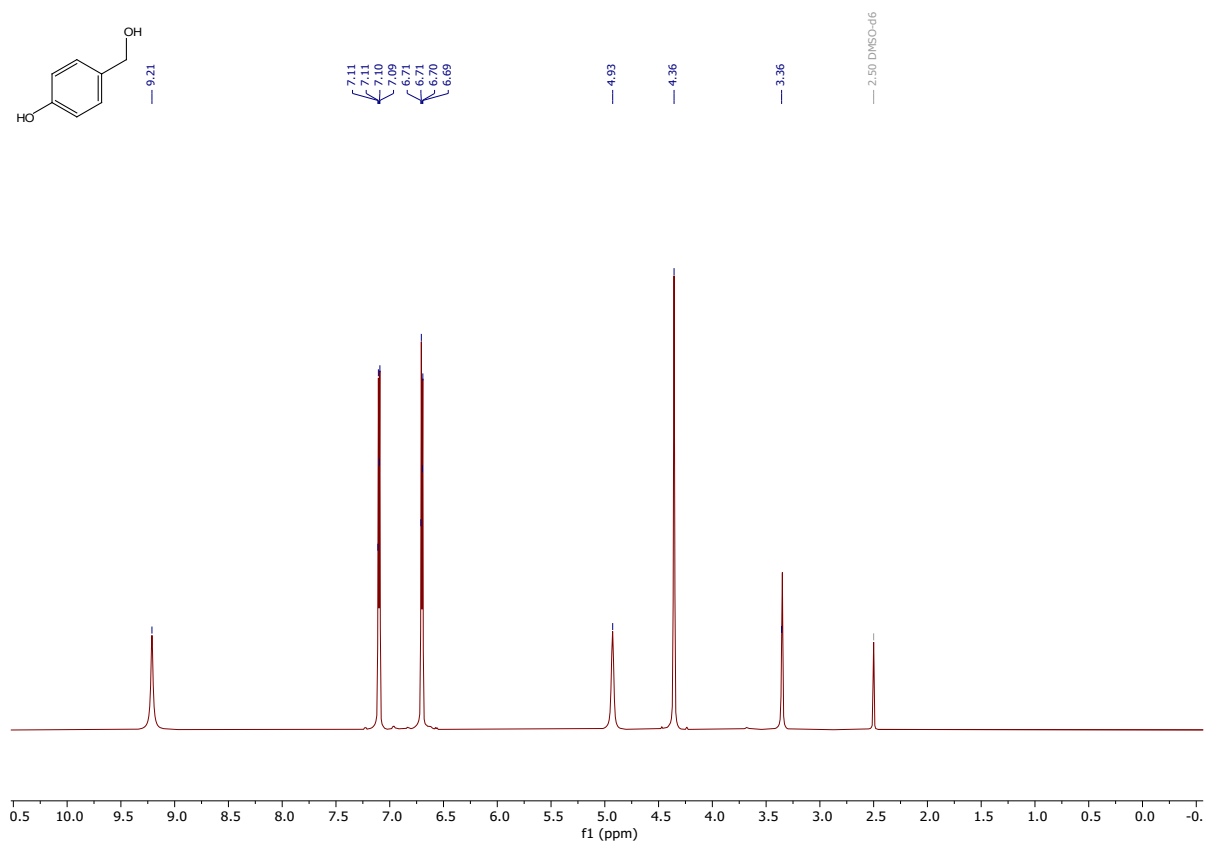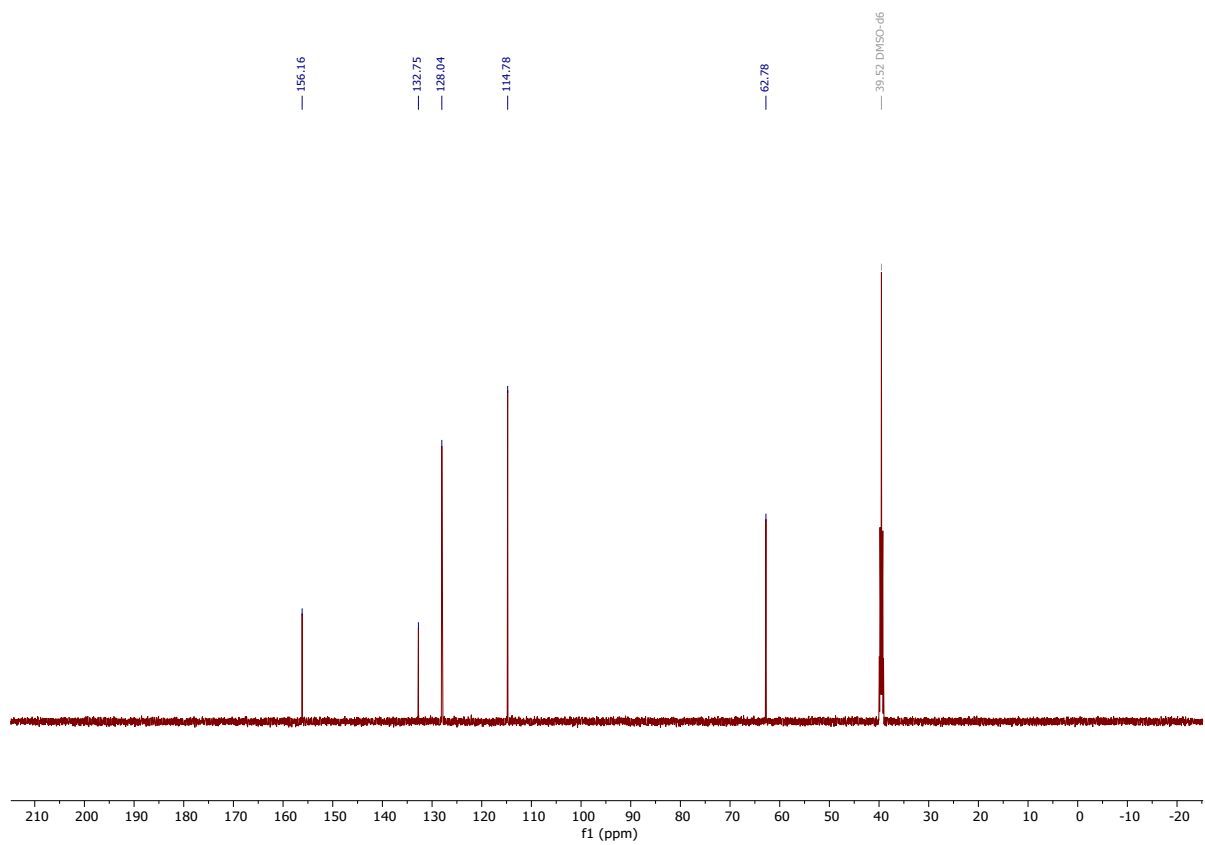

S48

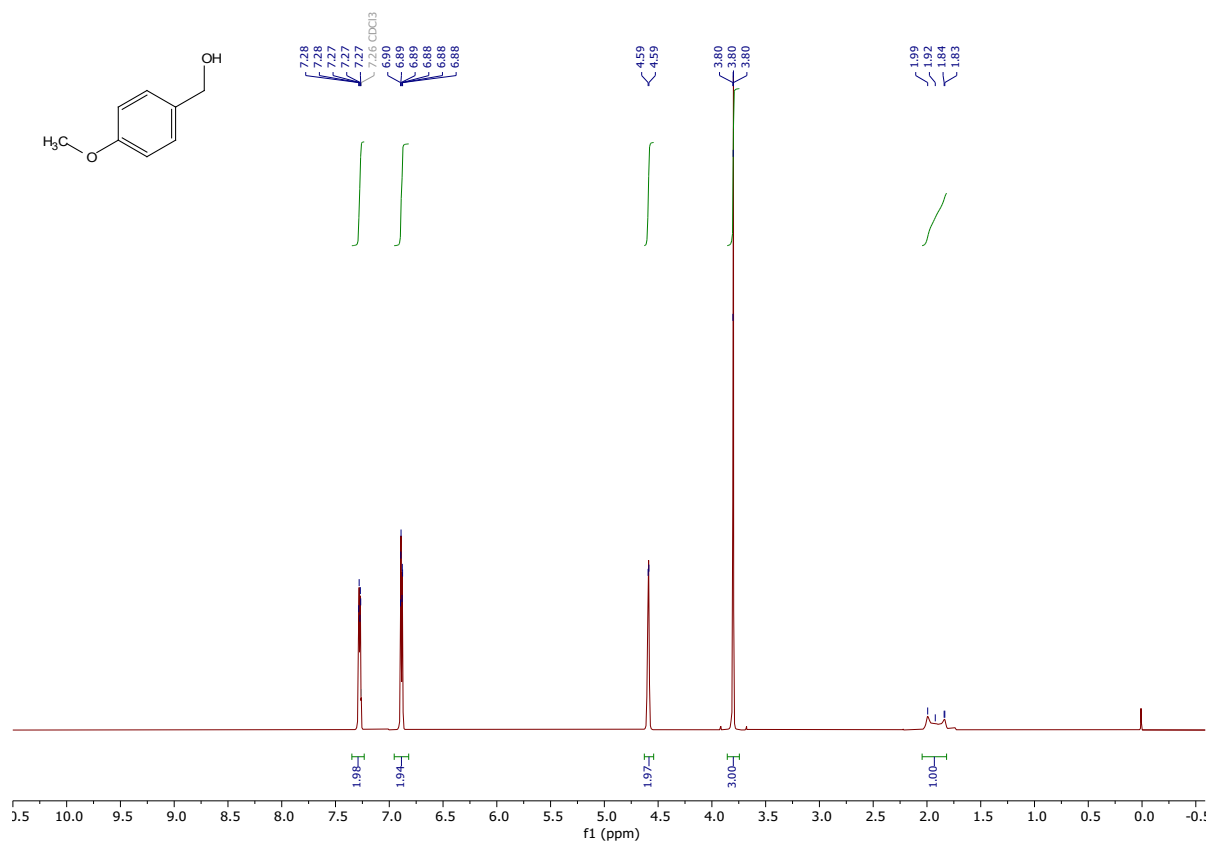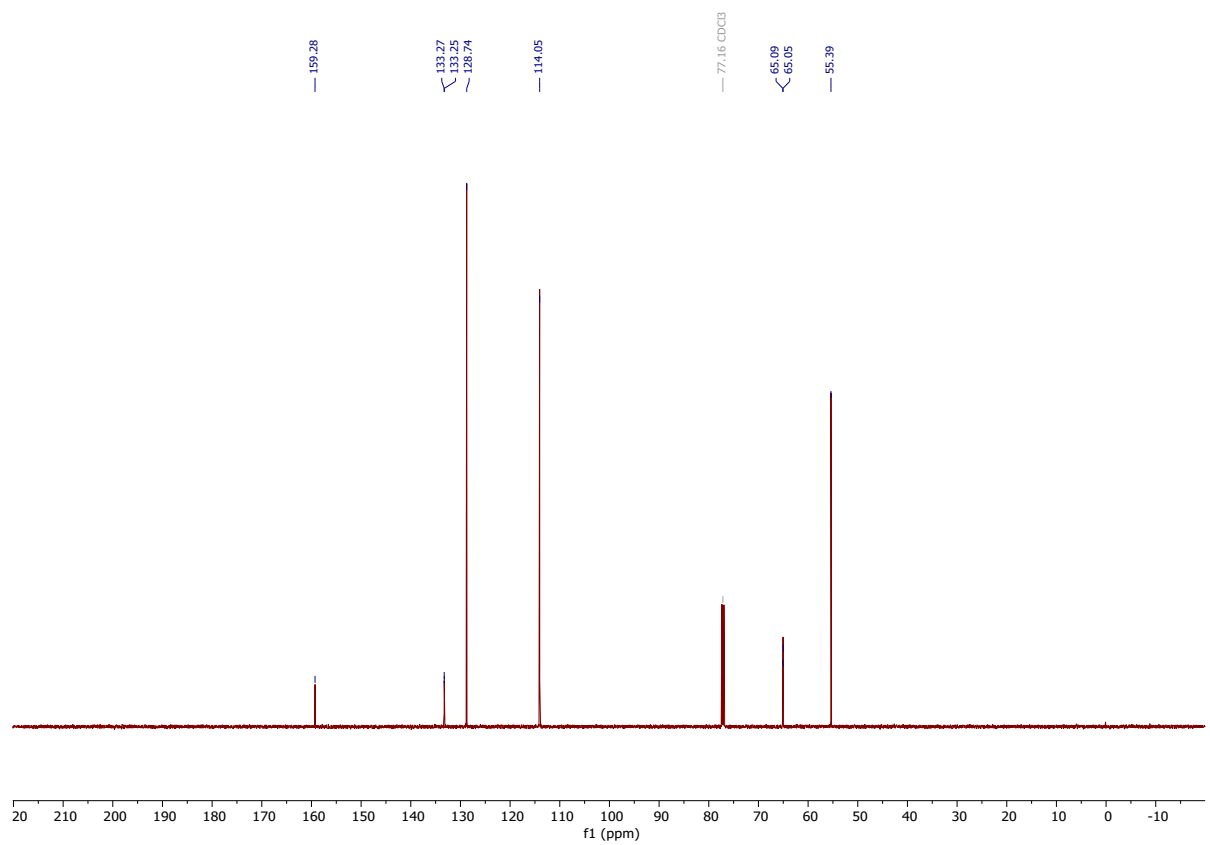

S49

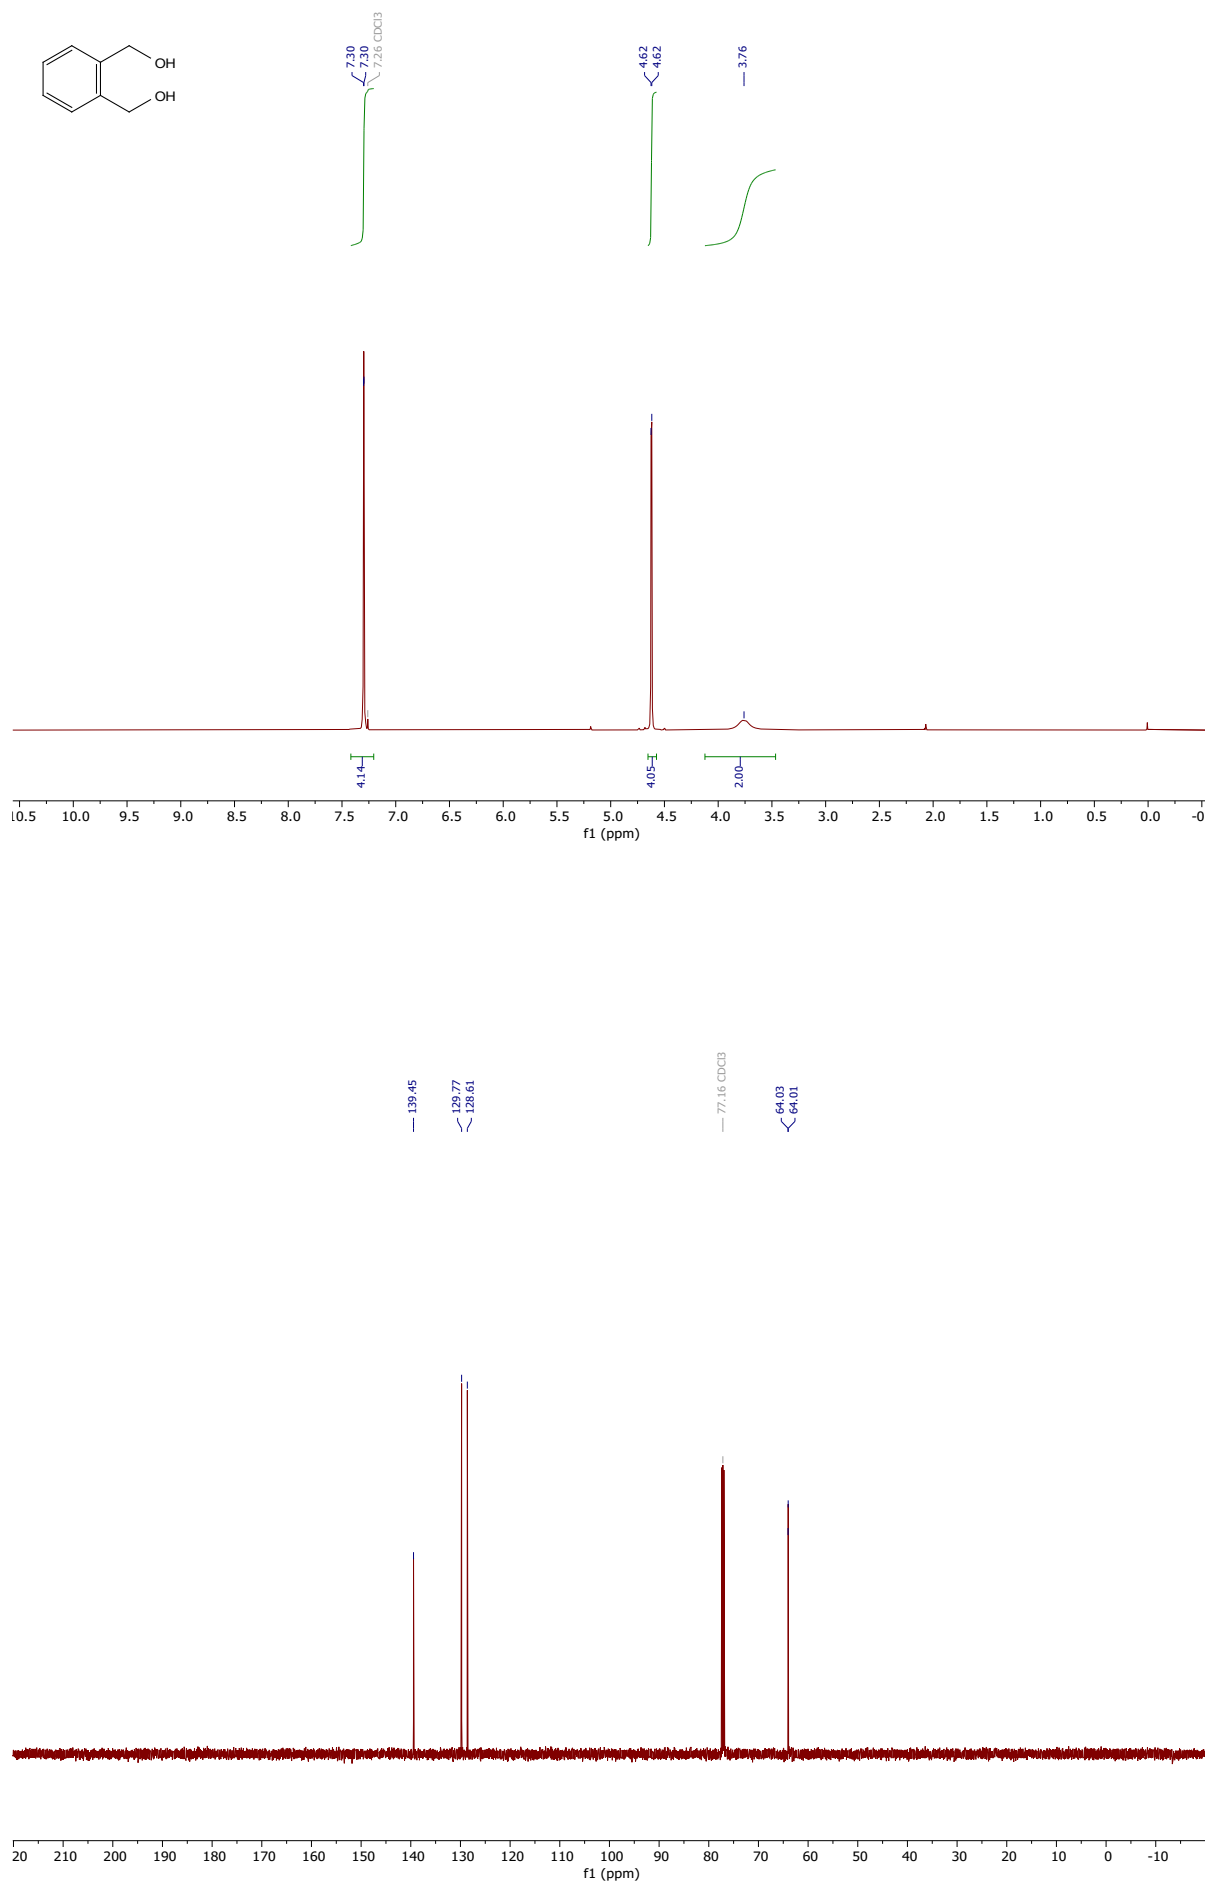

S50

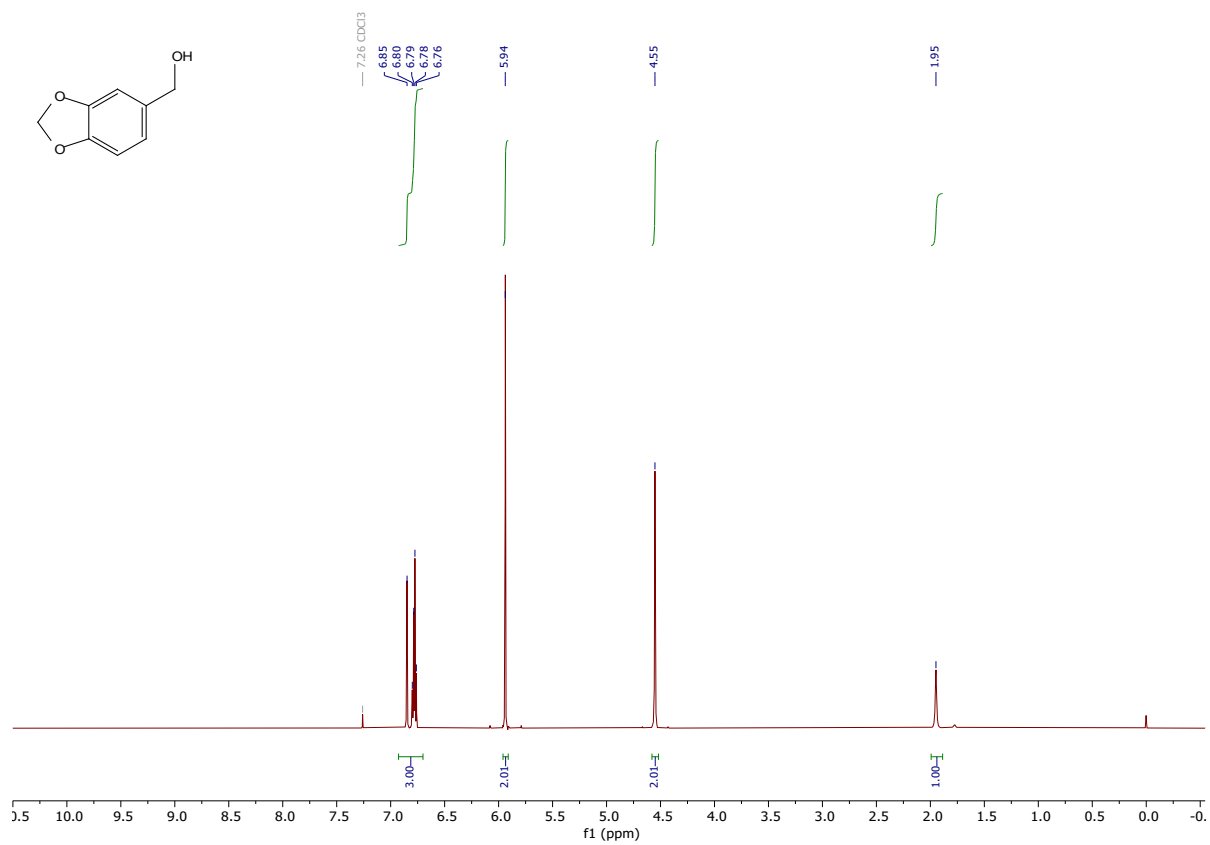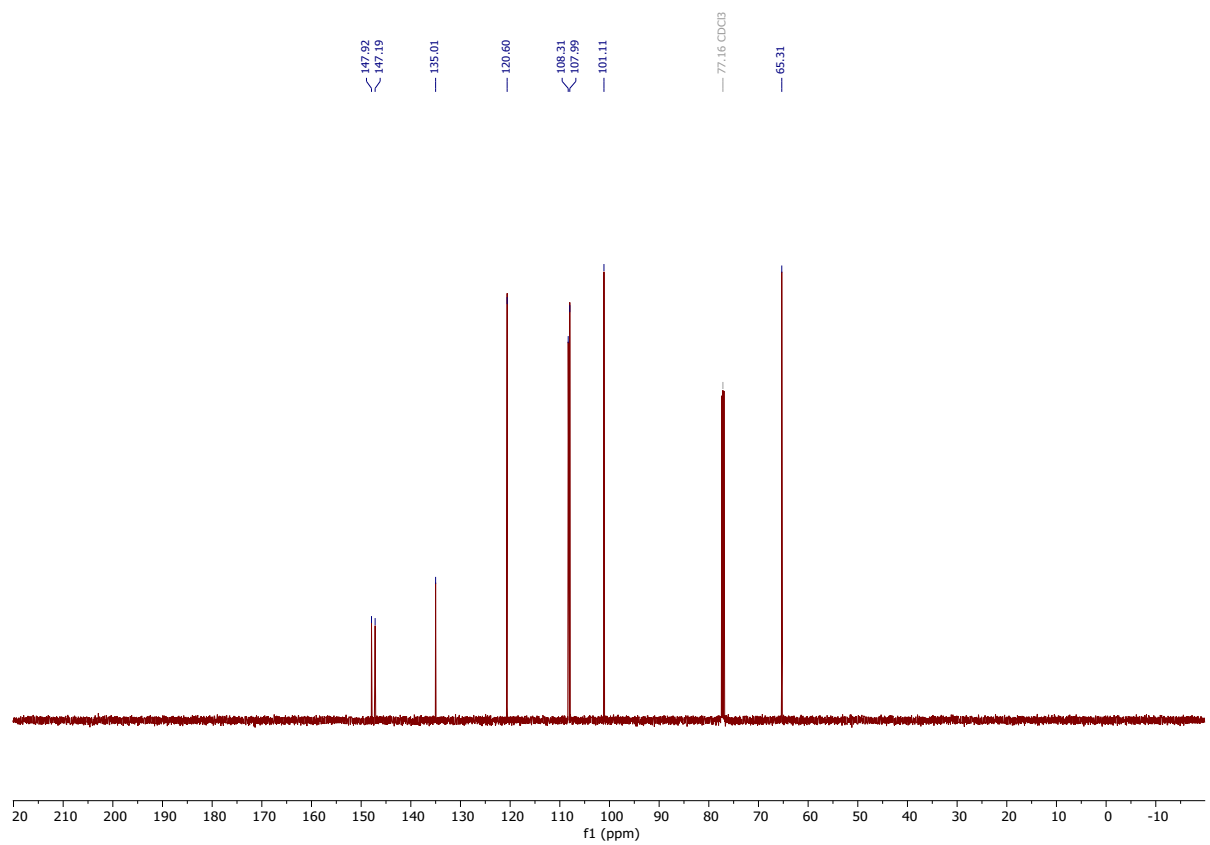

S51

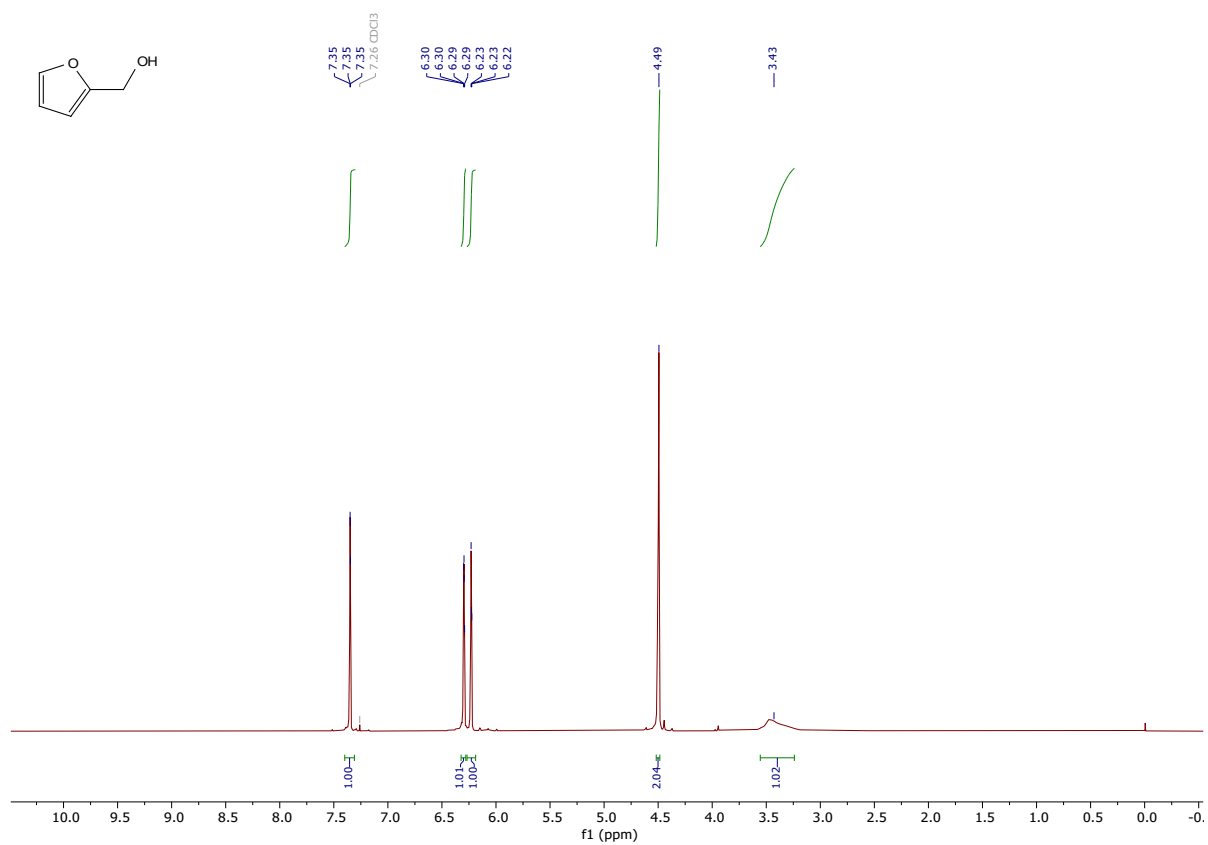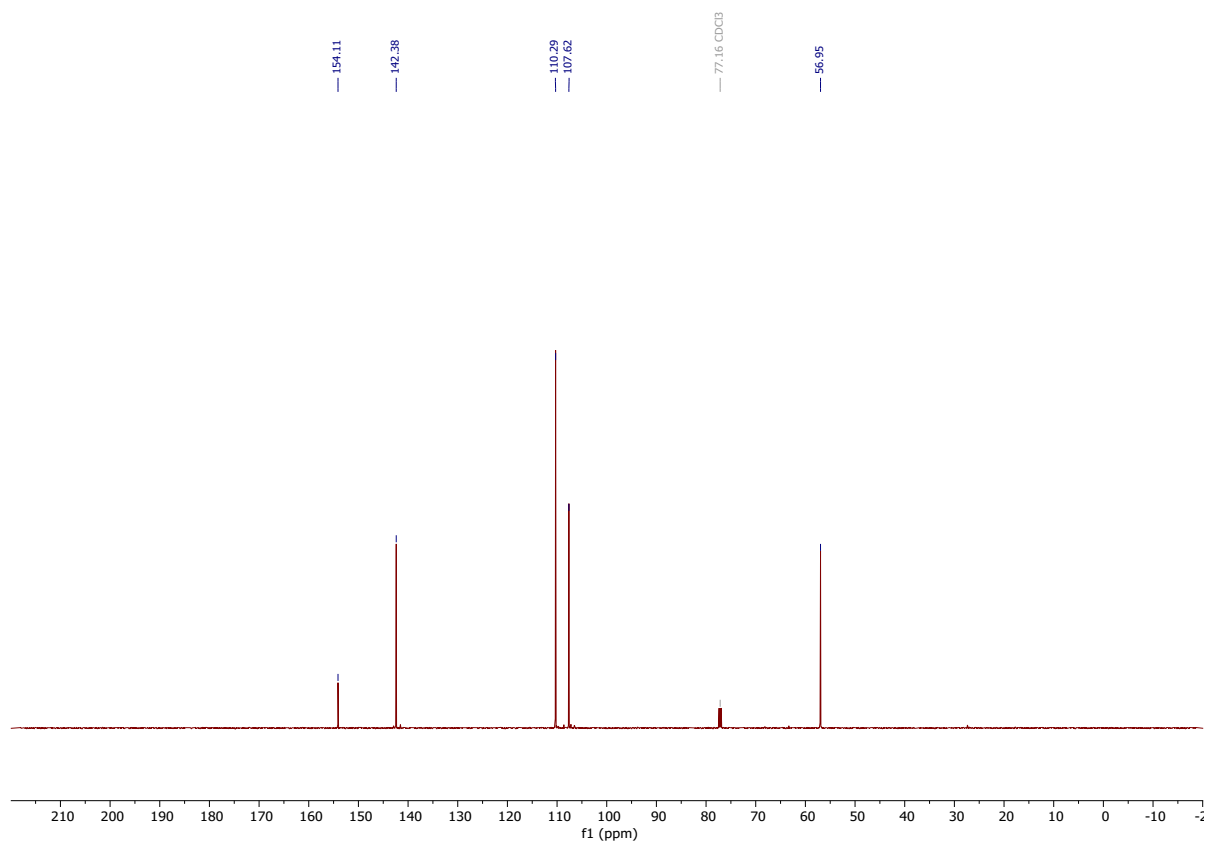

S52

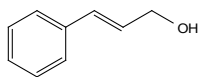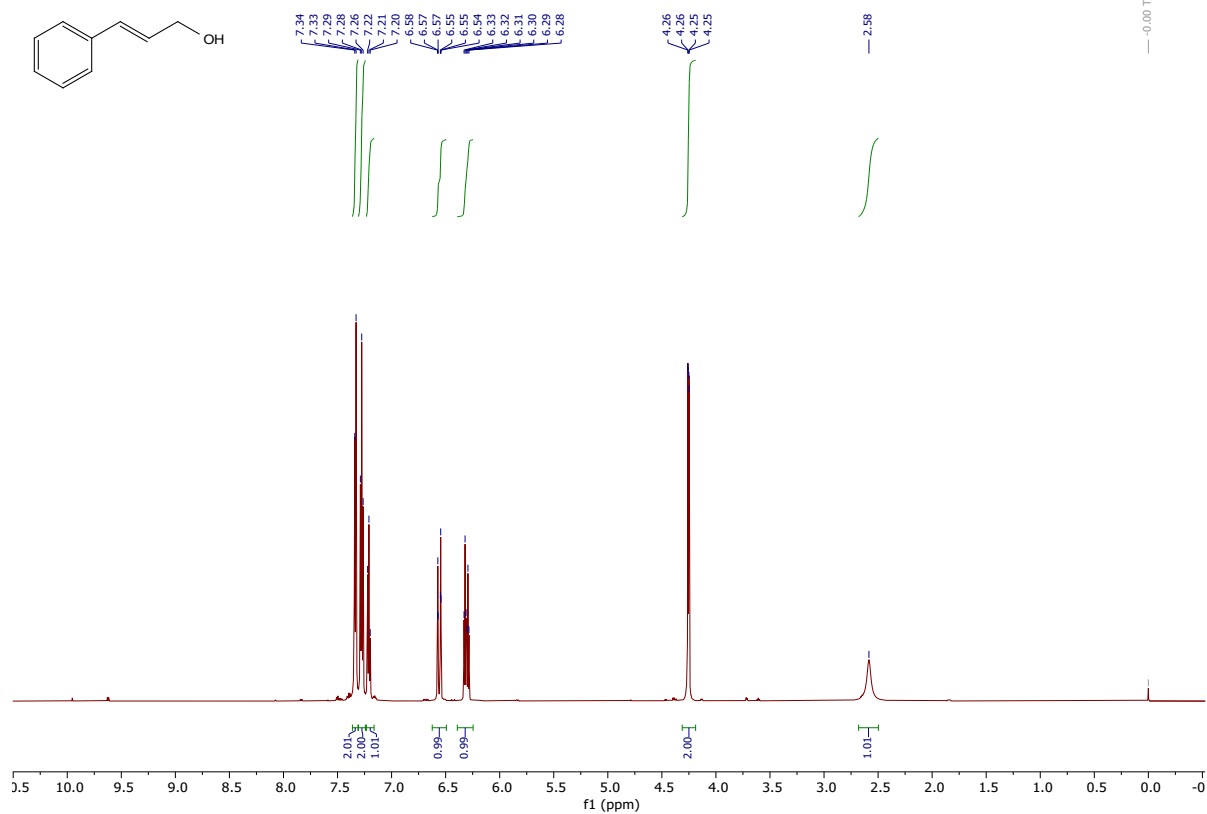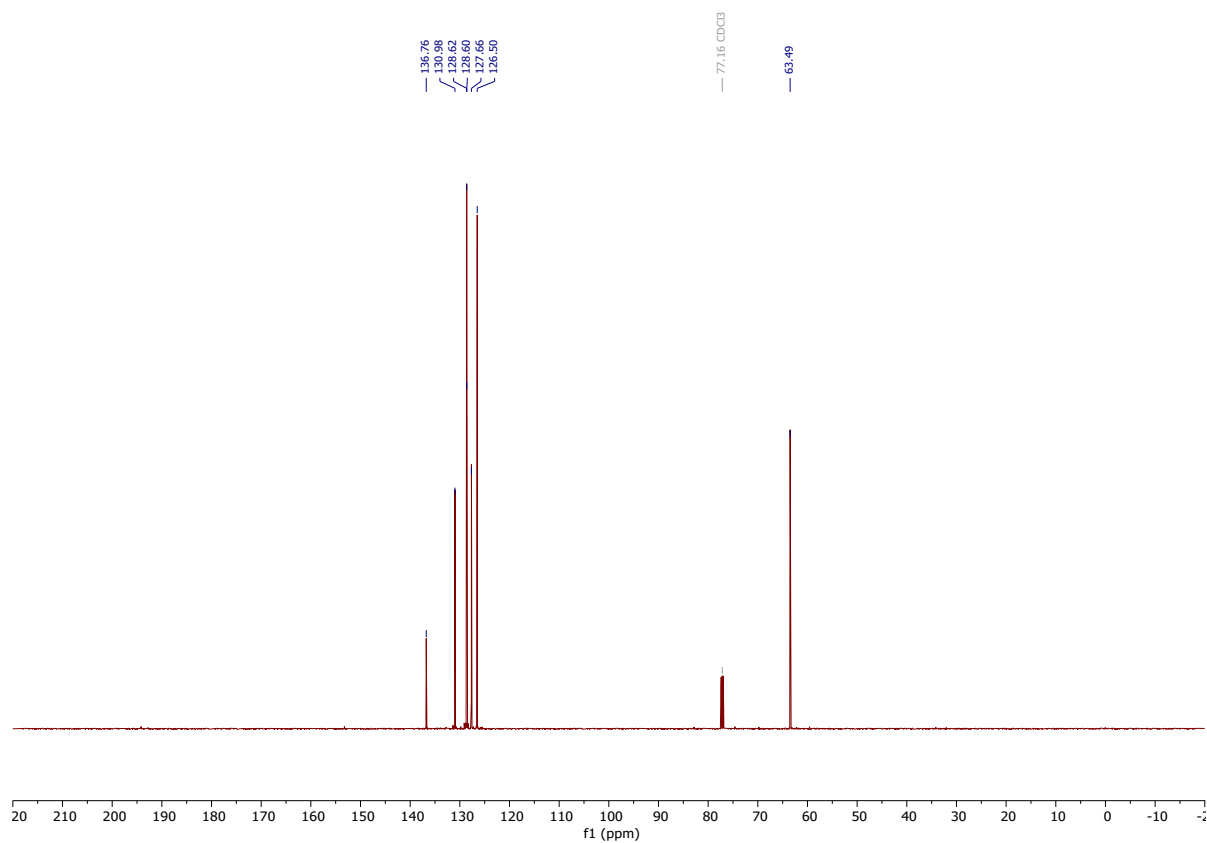

S53

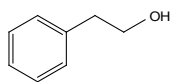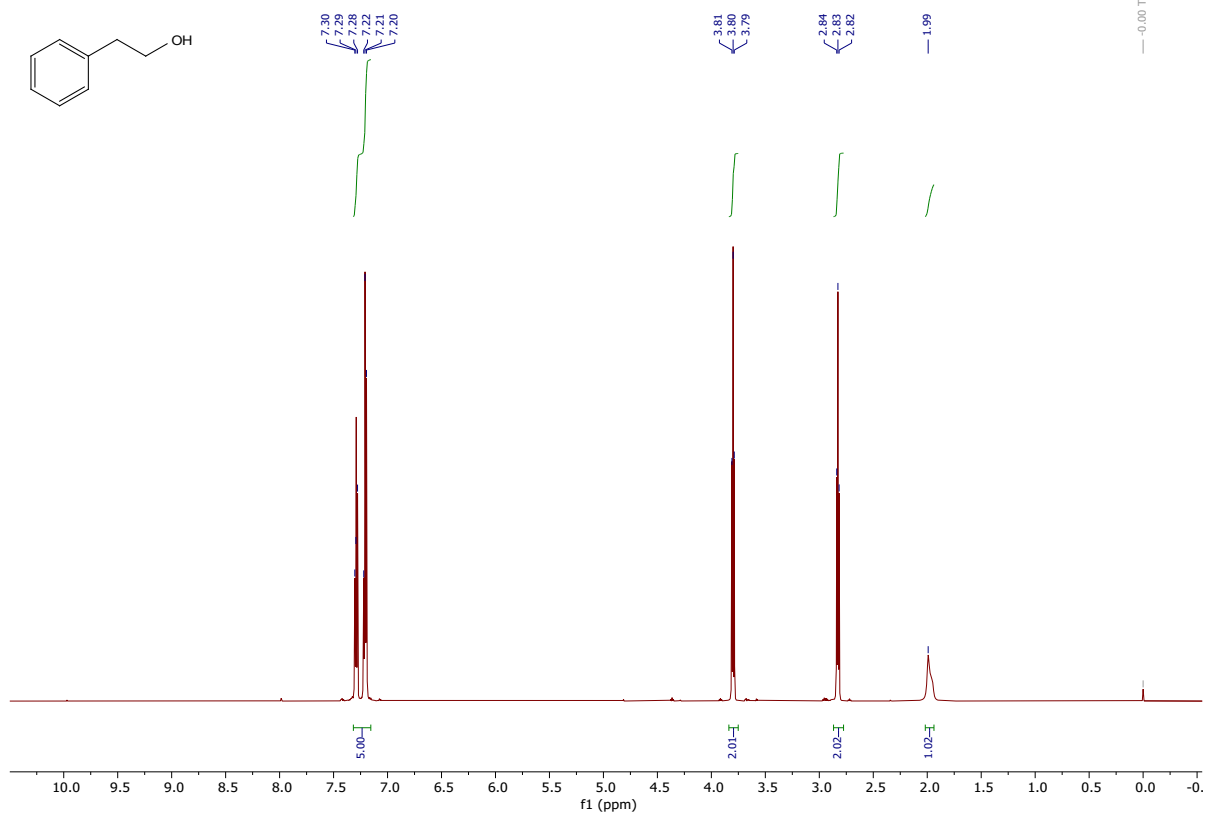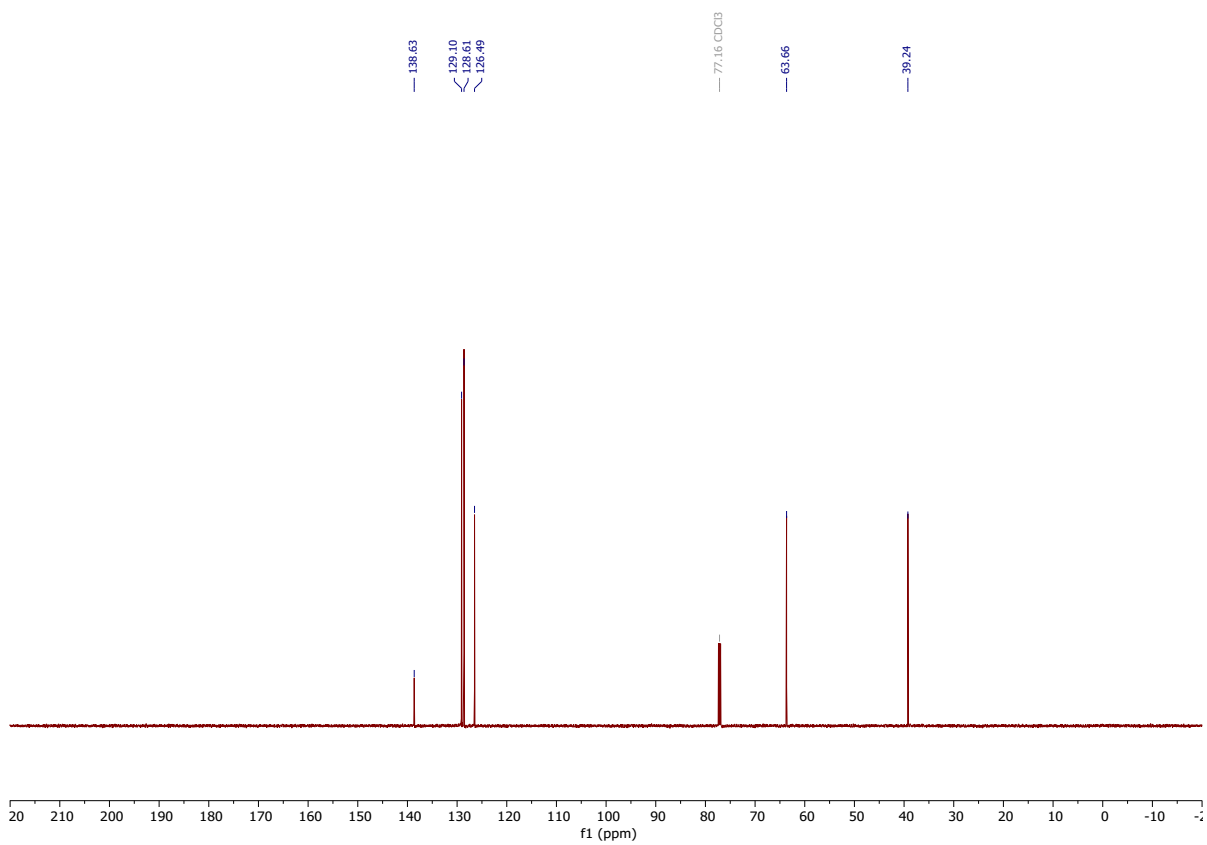

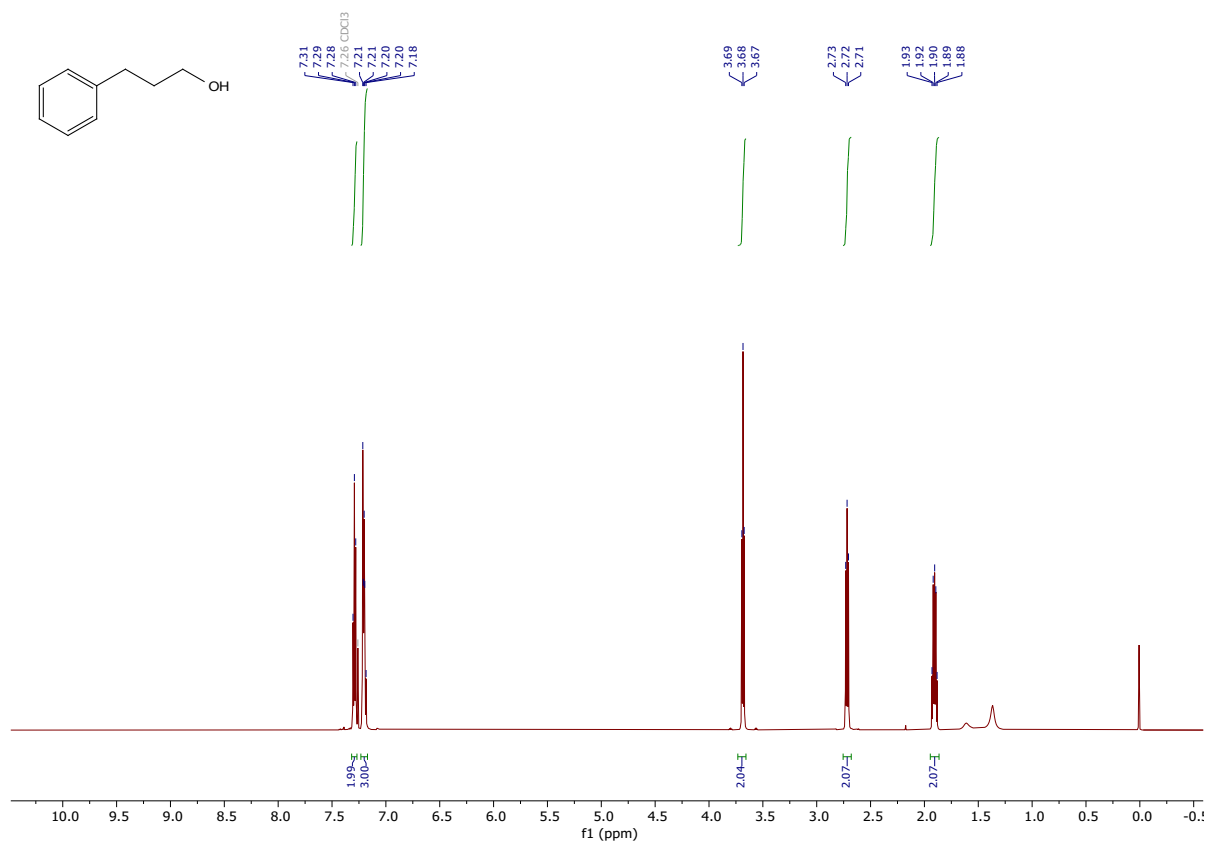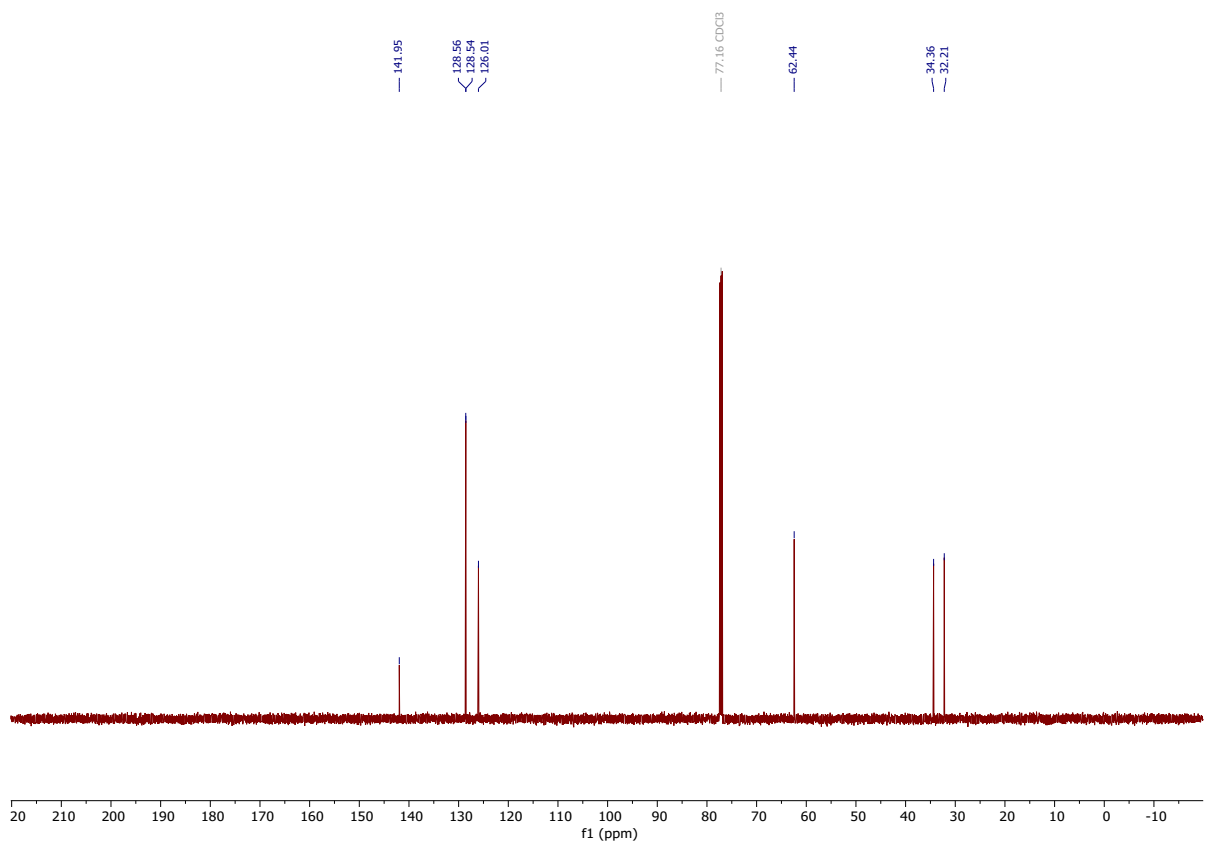

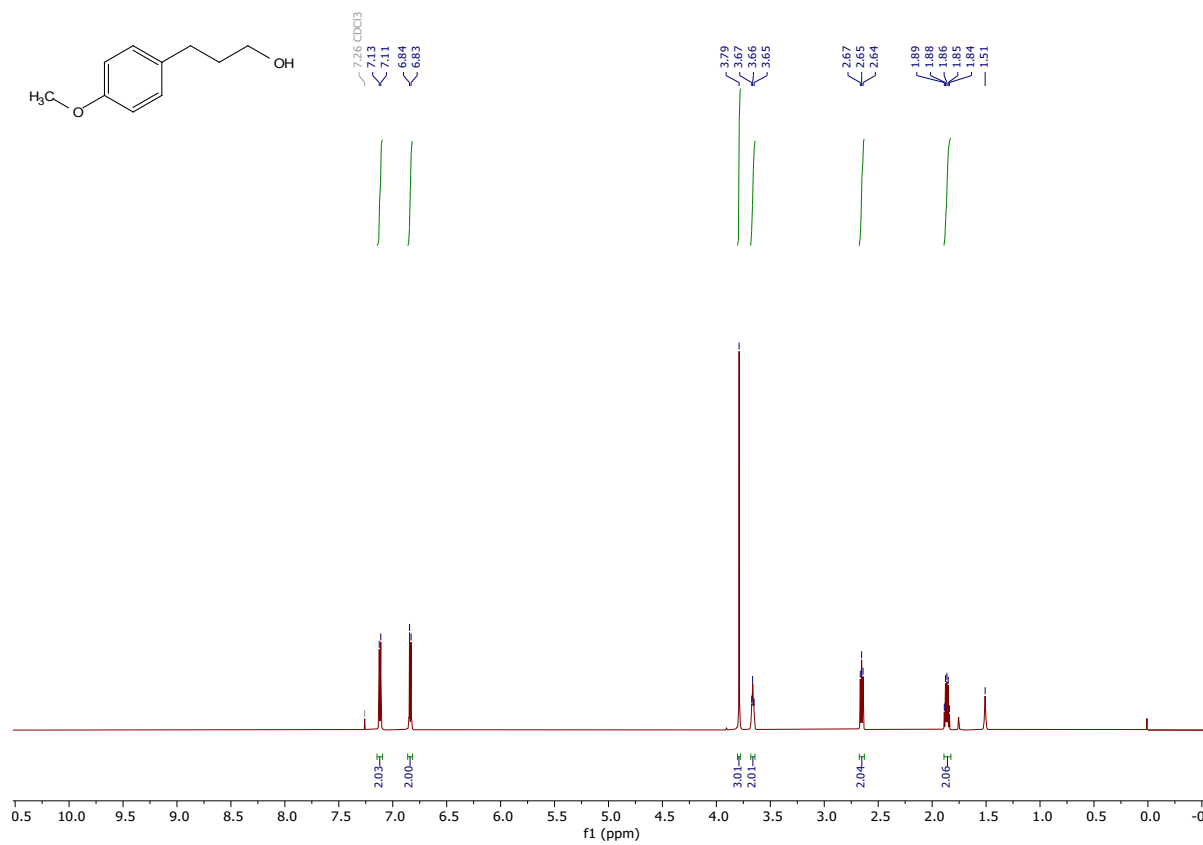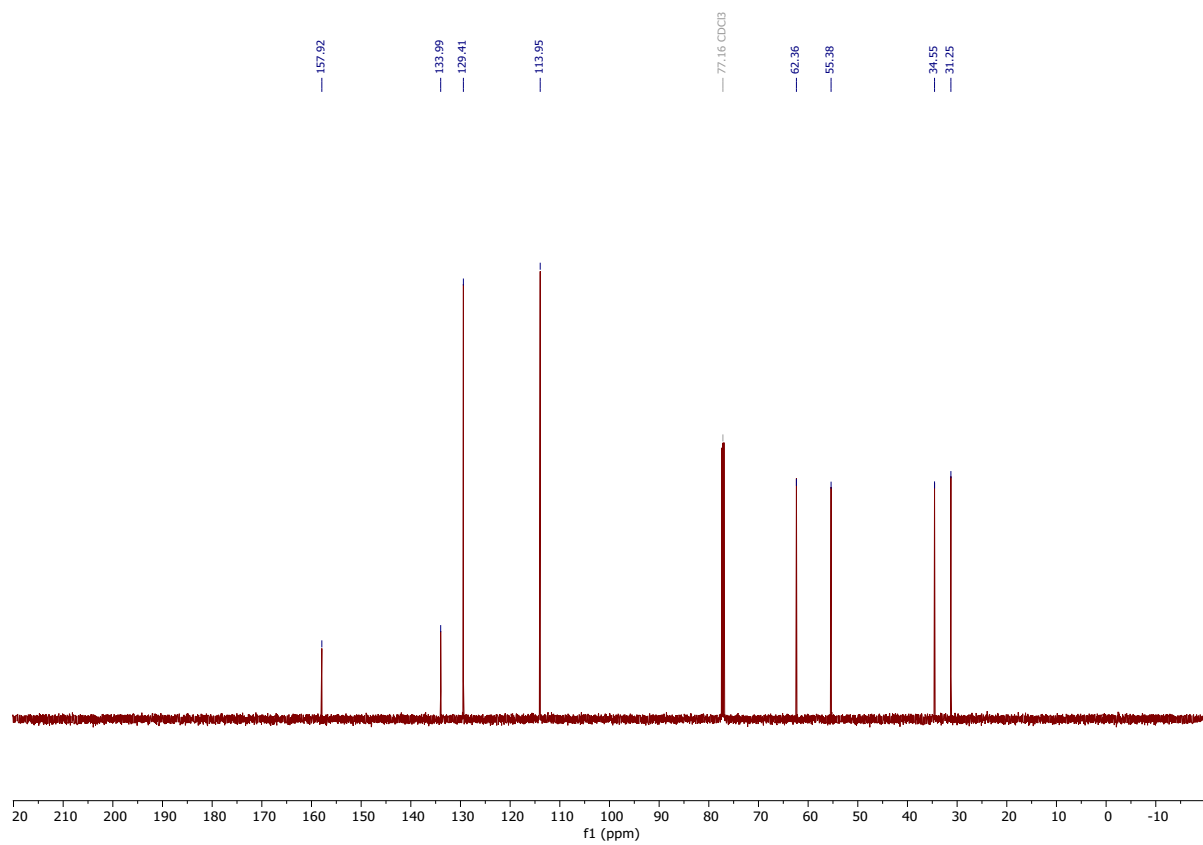

S56

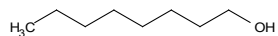

— 77.16 CDCl<sub>3</sub>

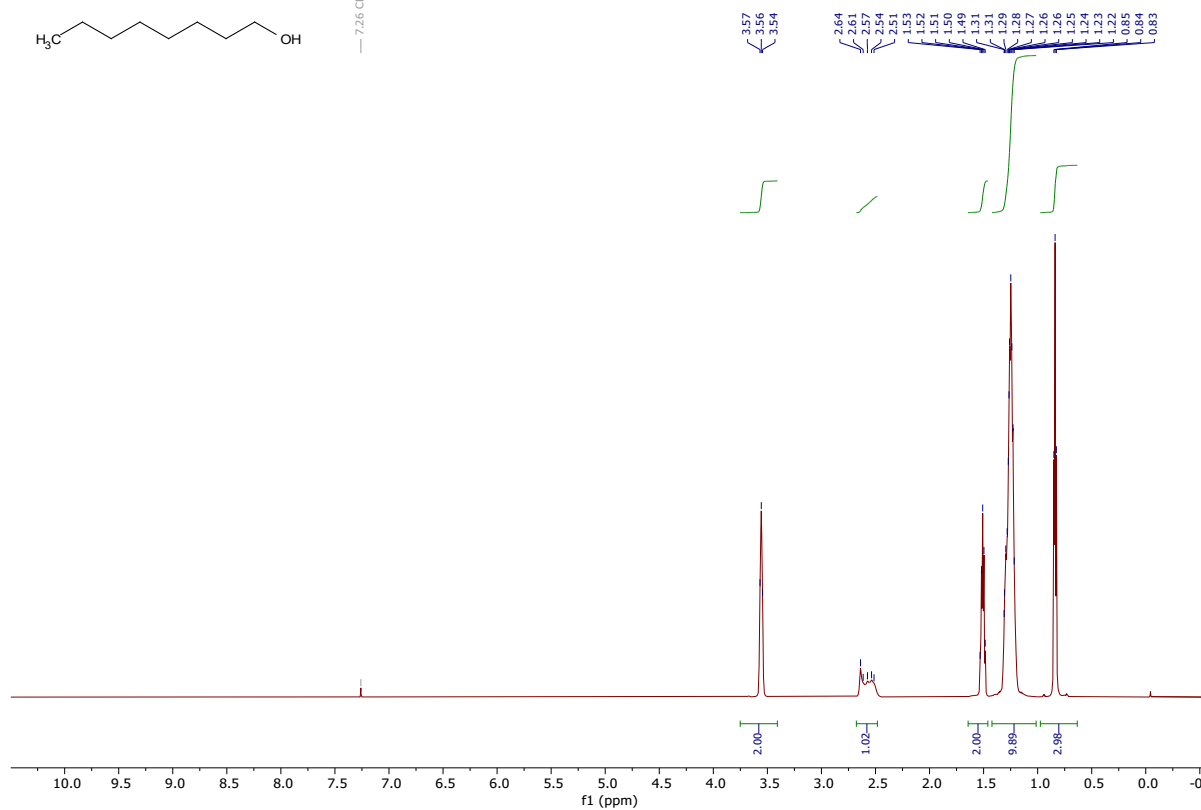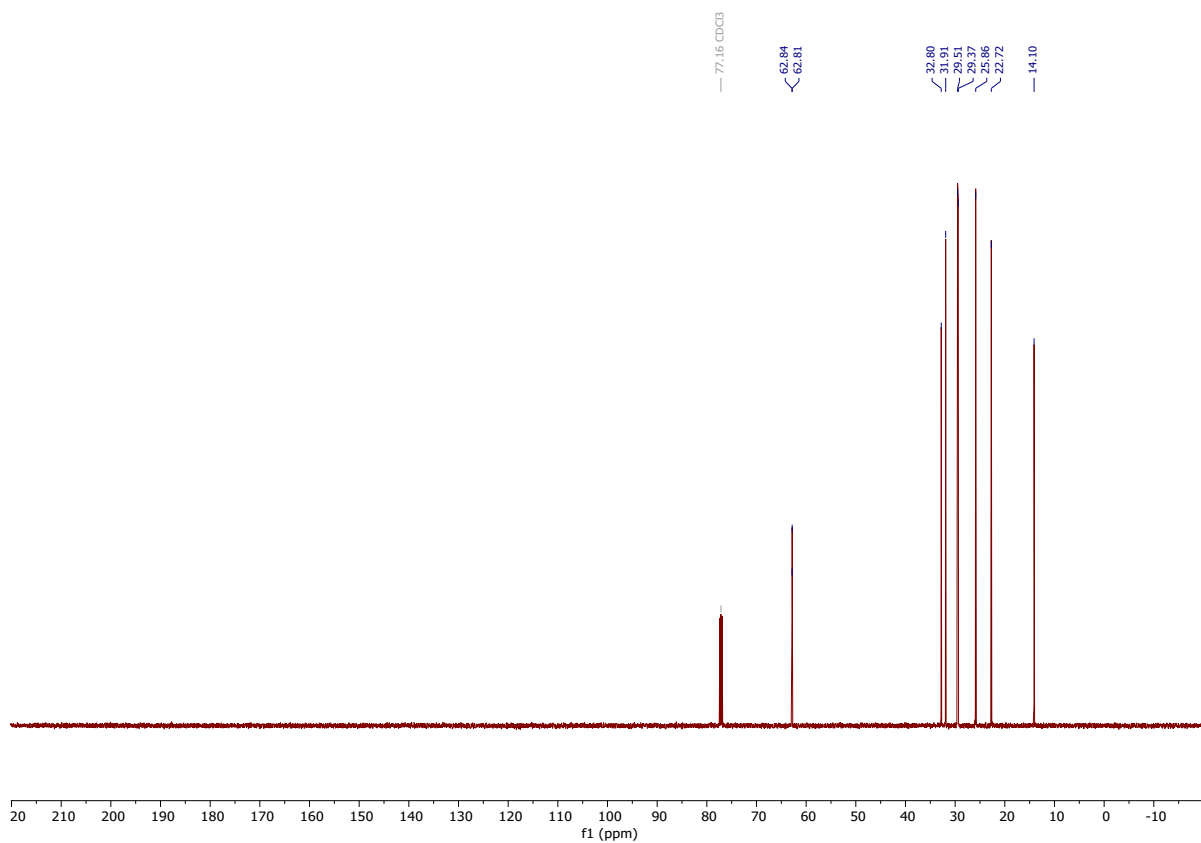

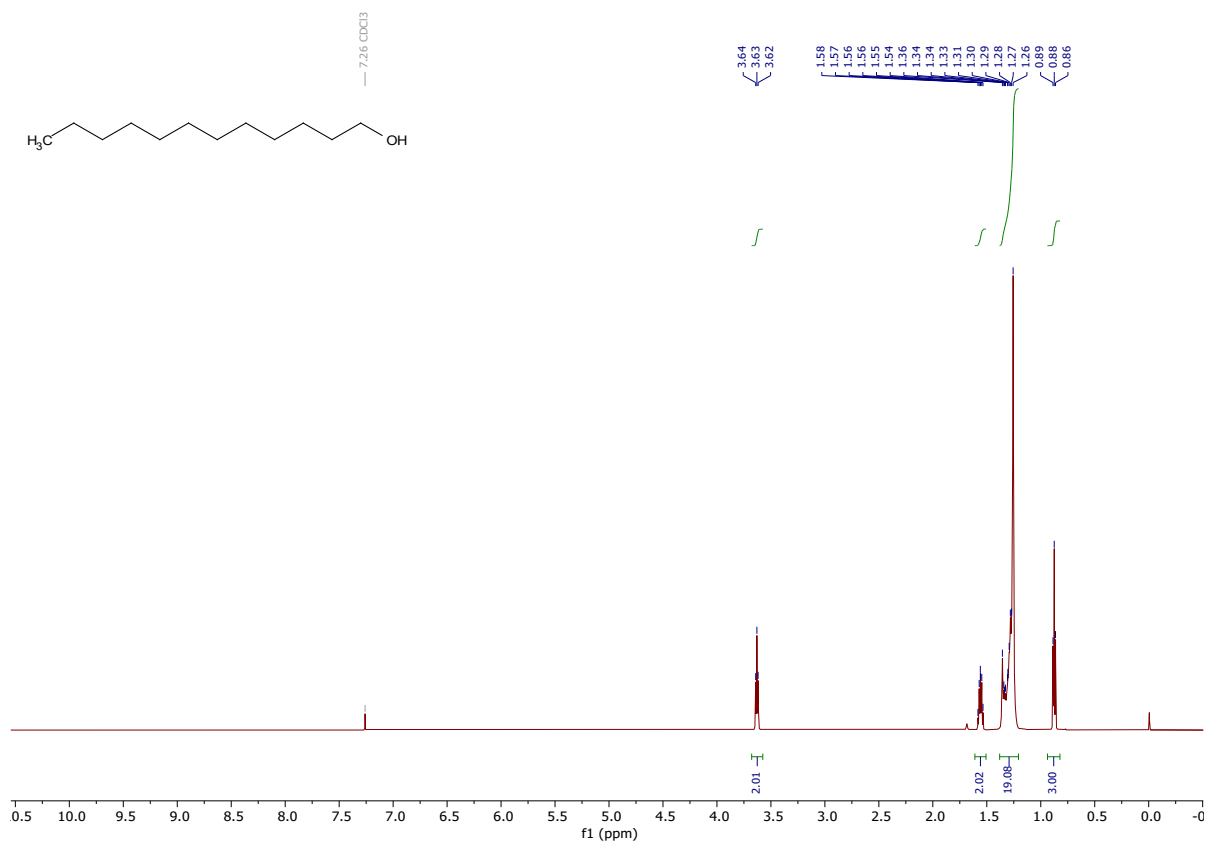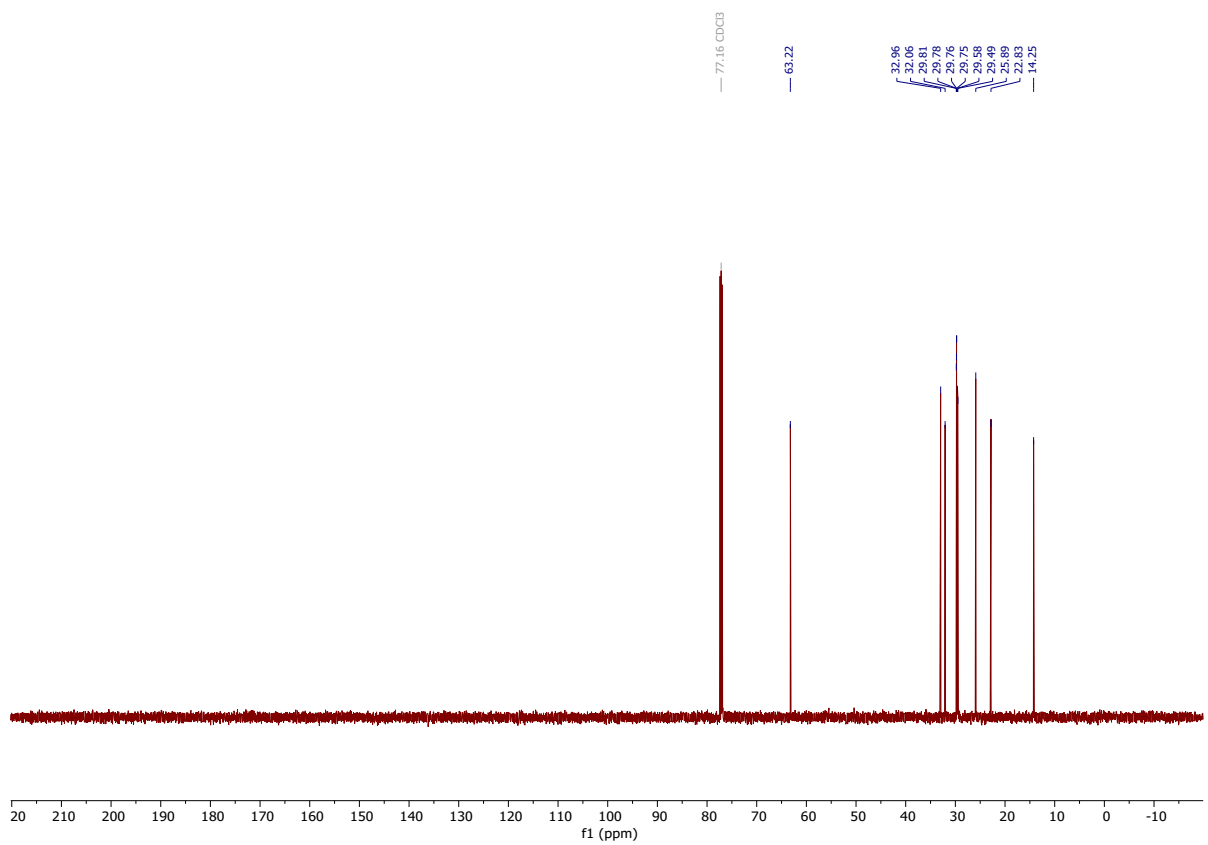

S58

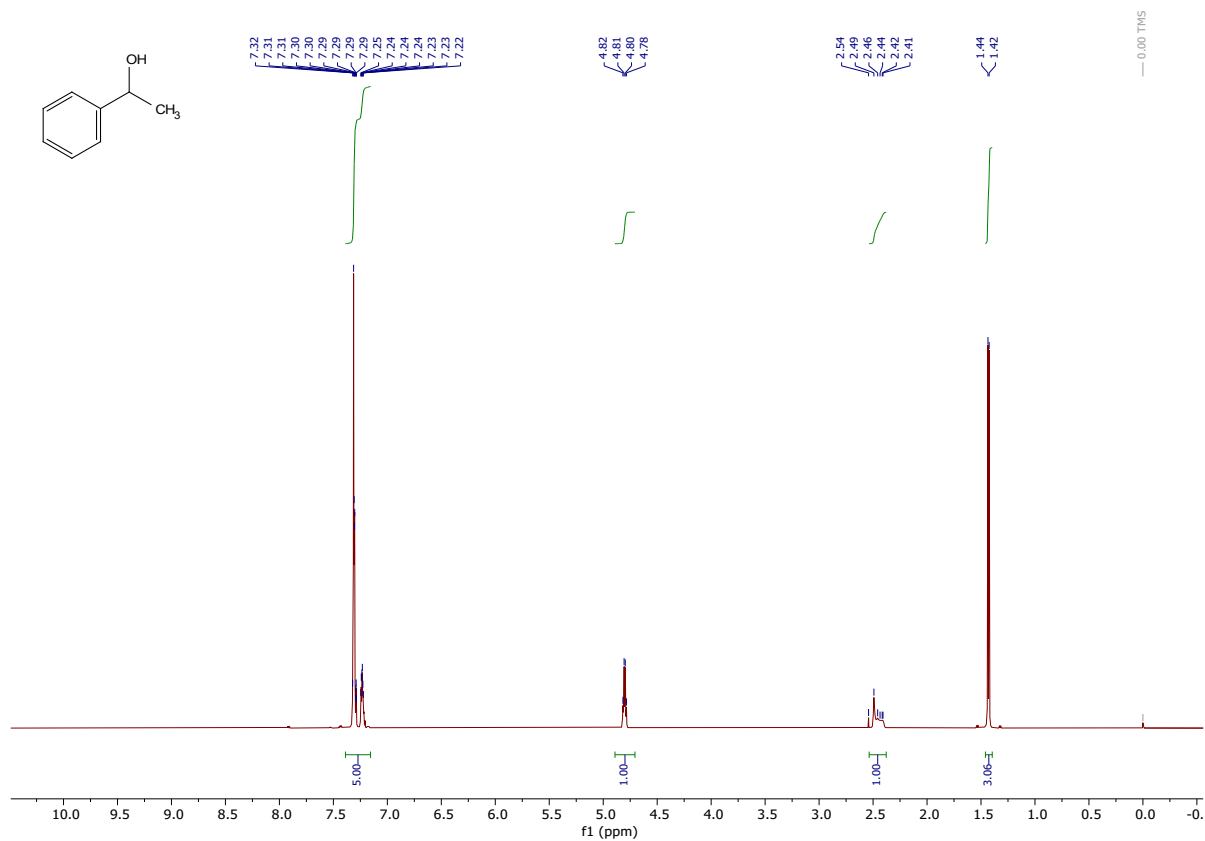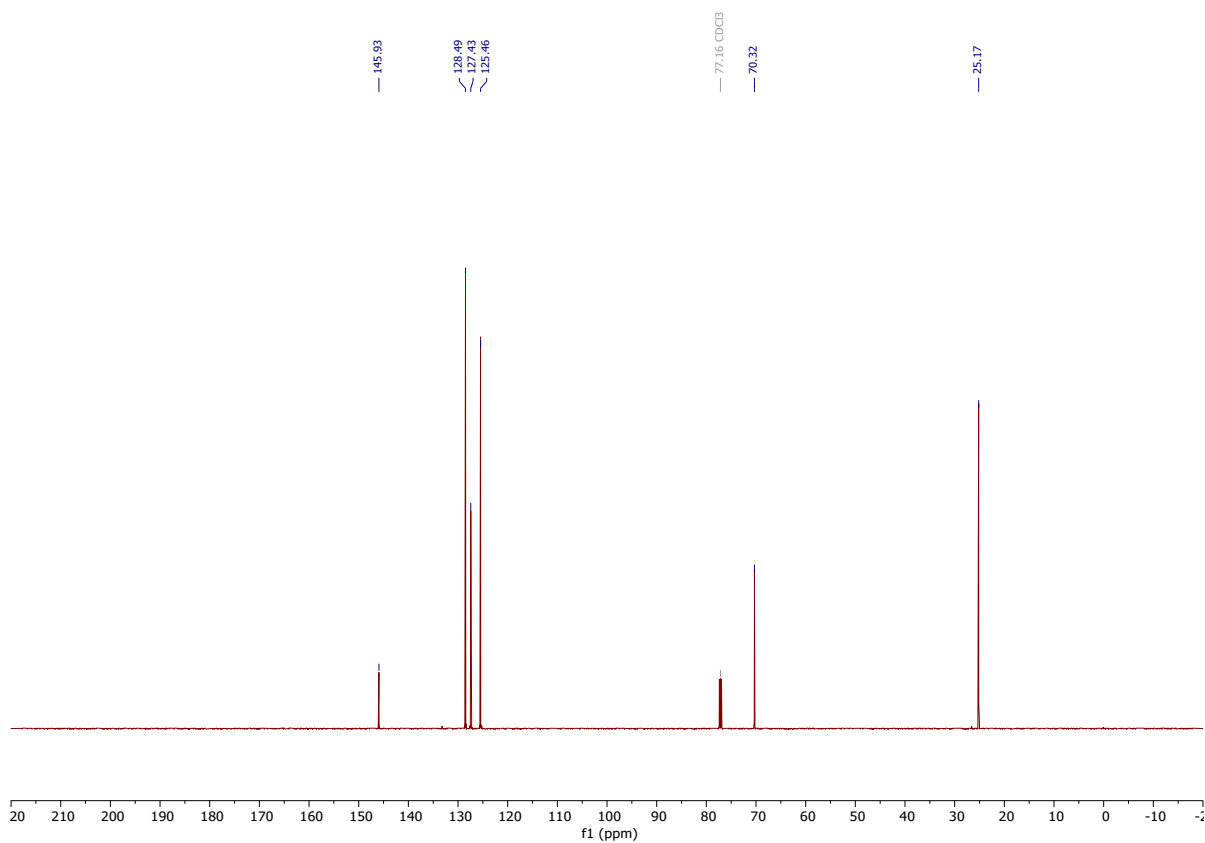

S59

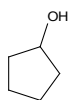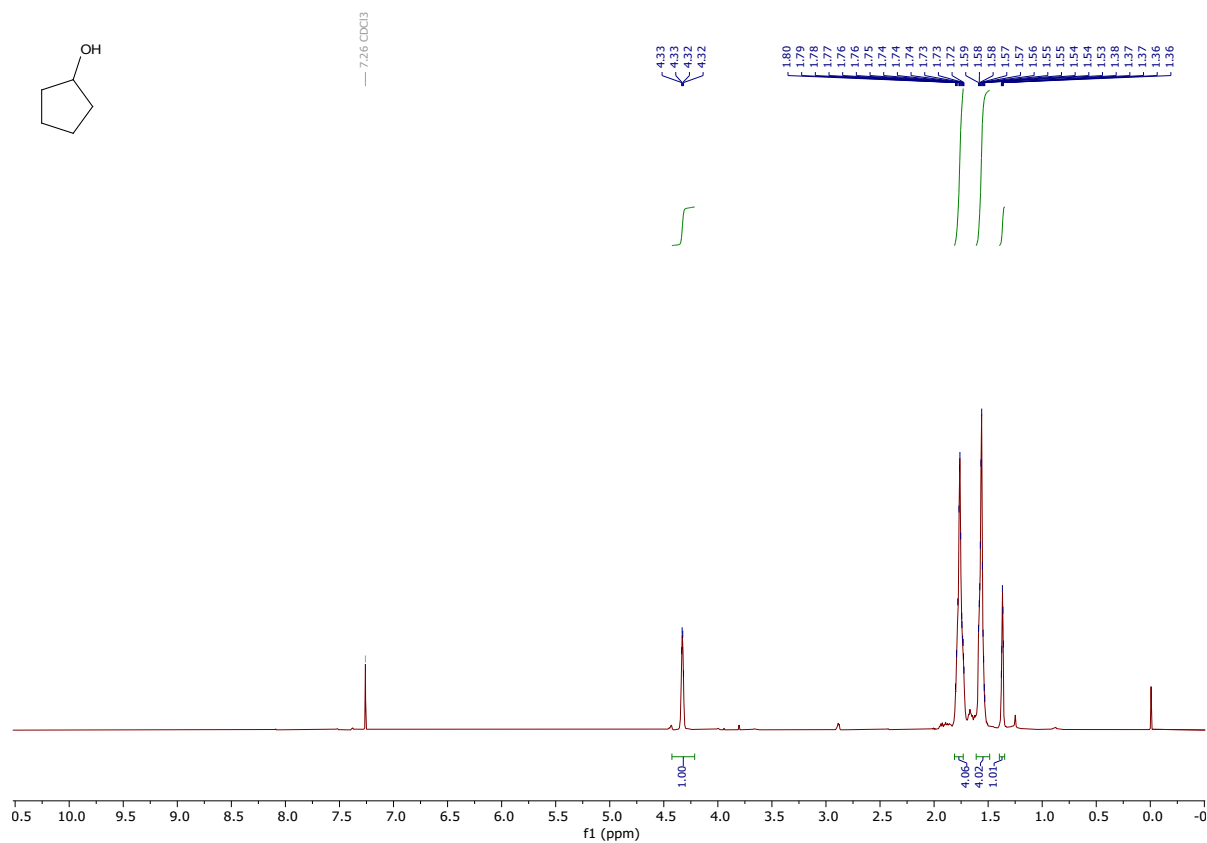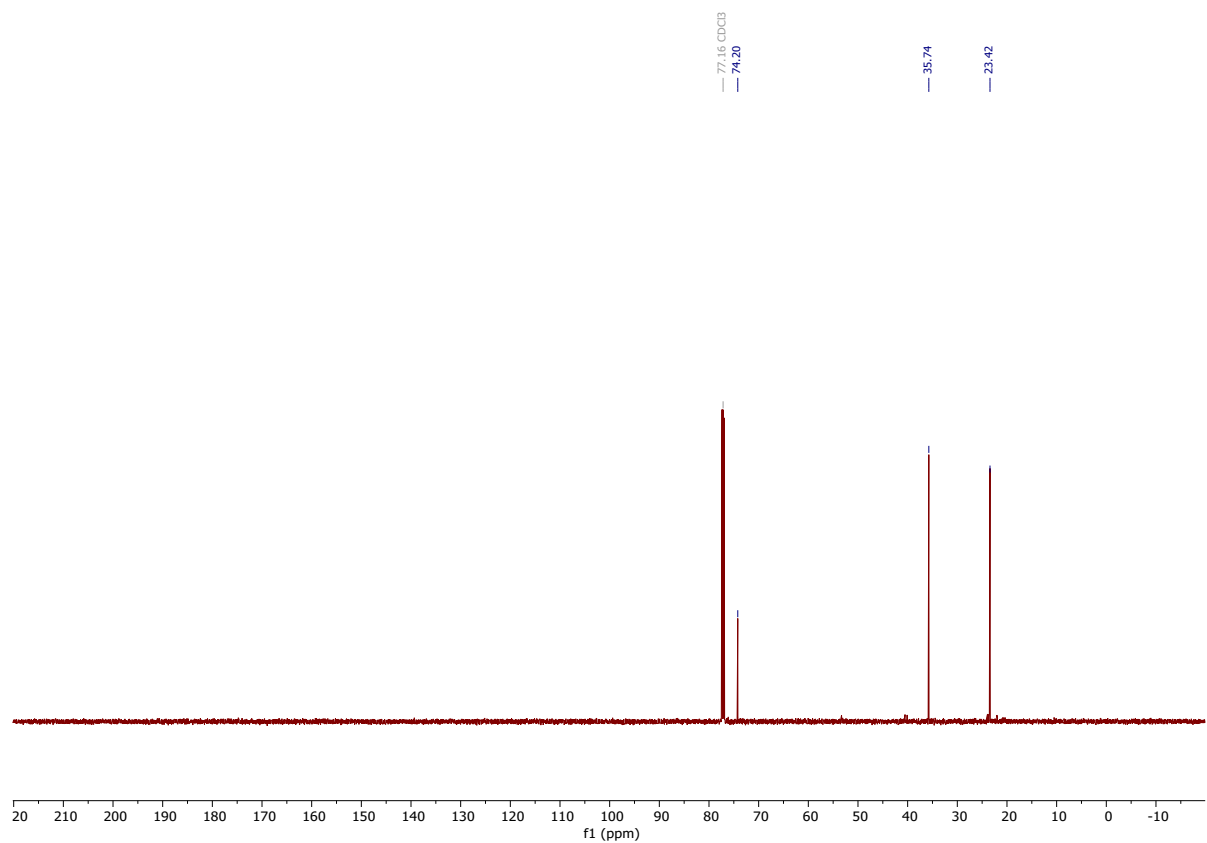

S60

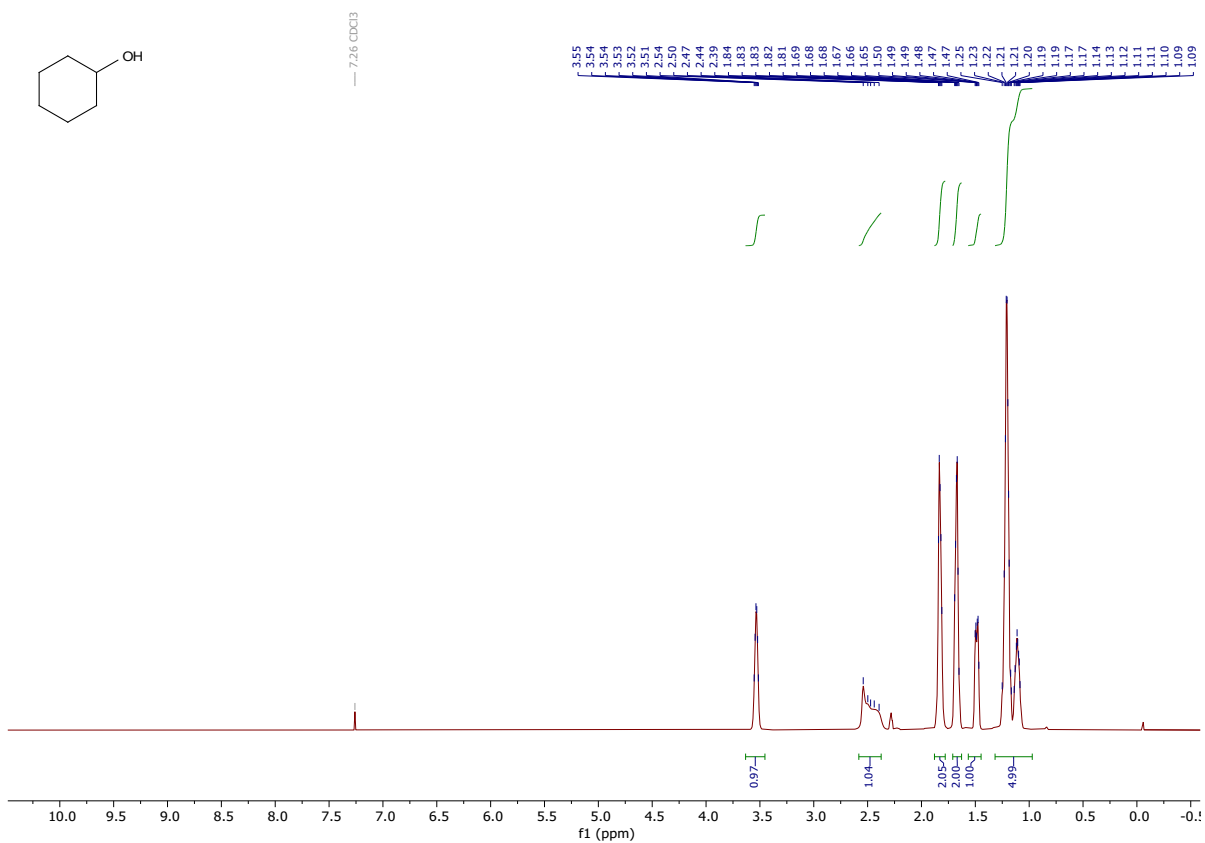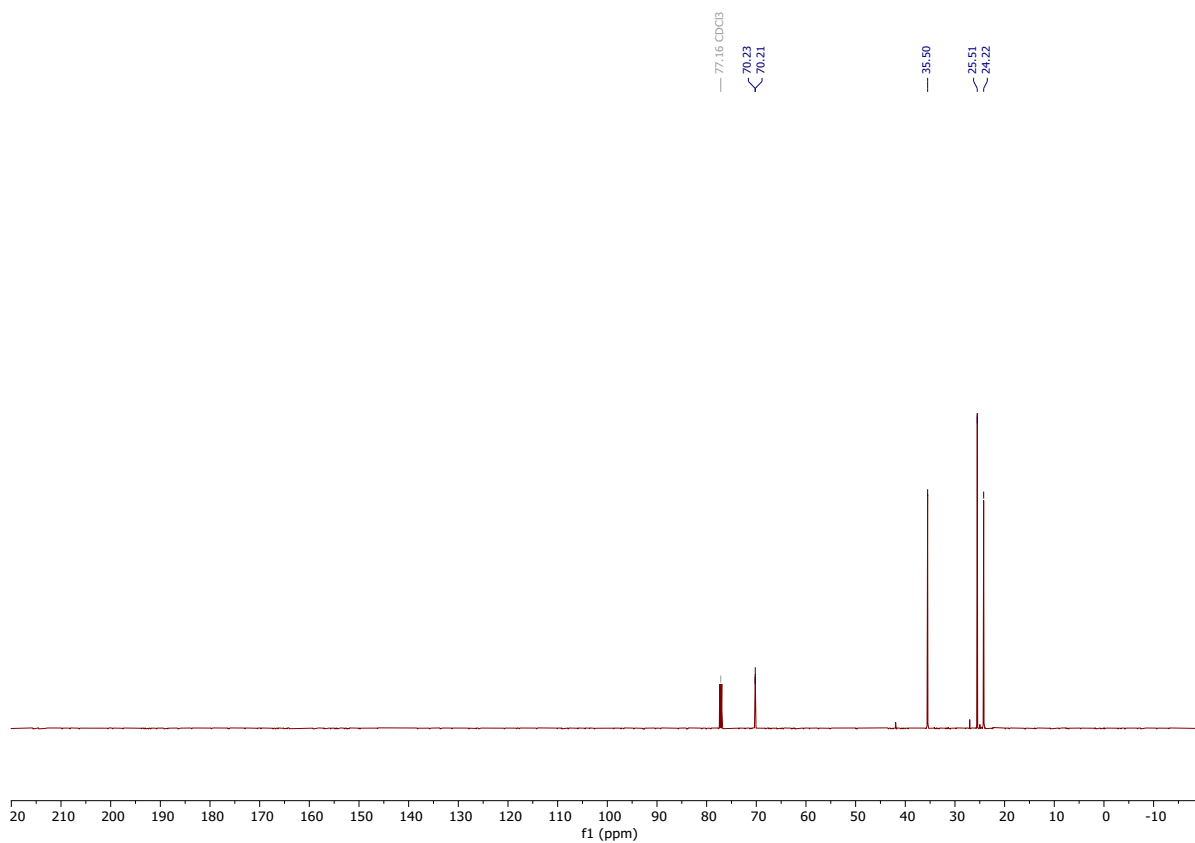

S61

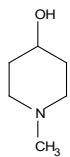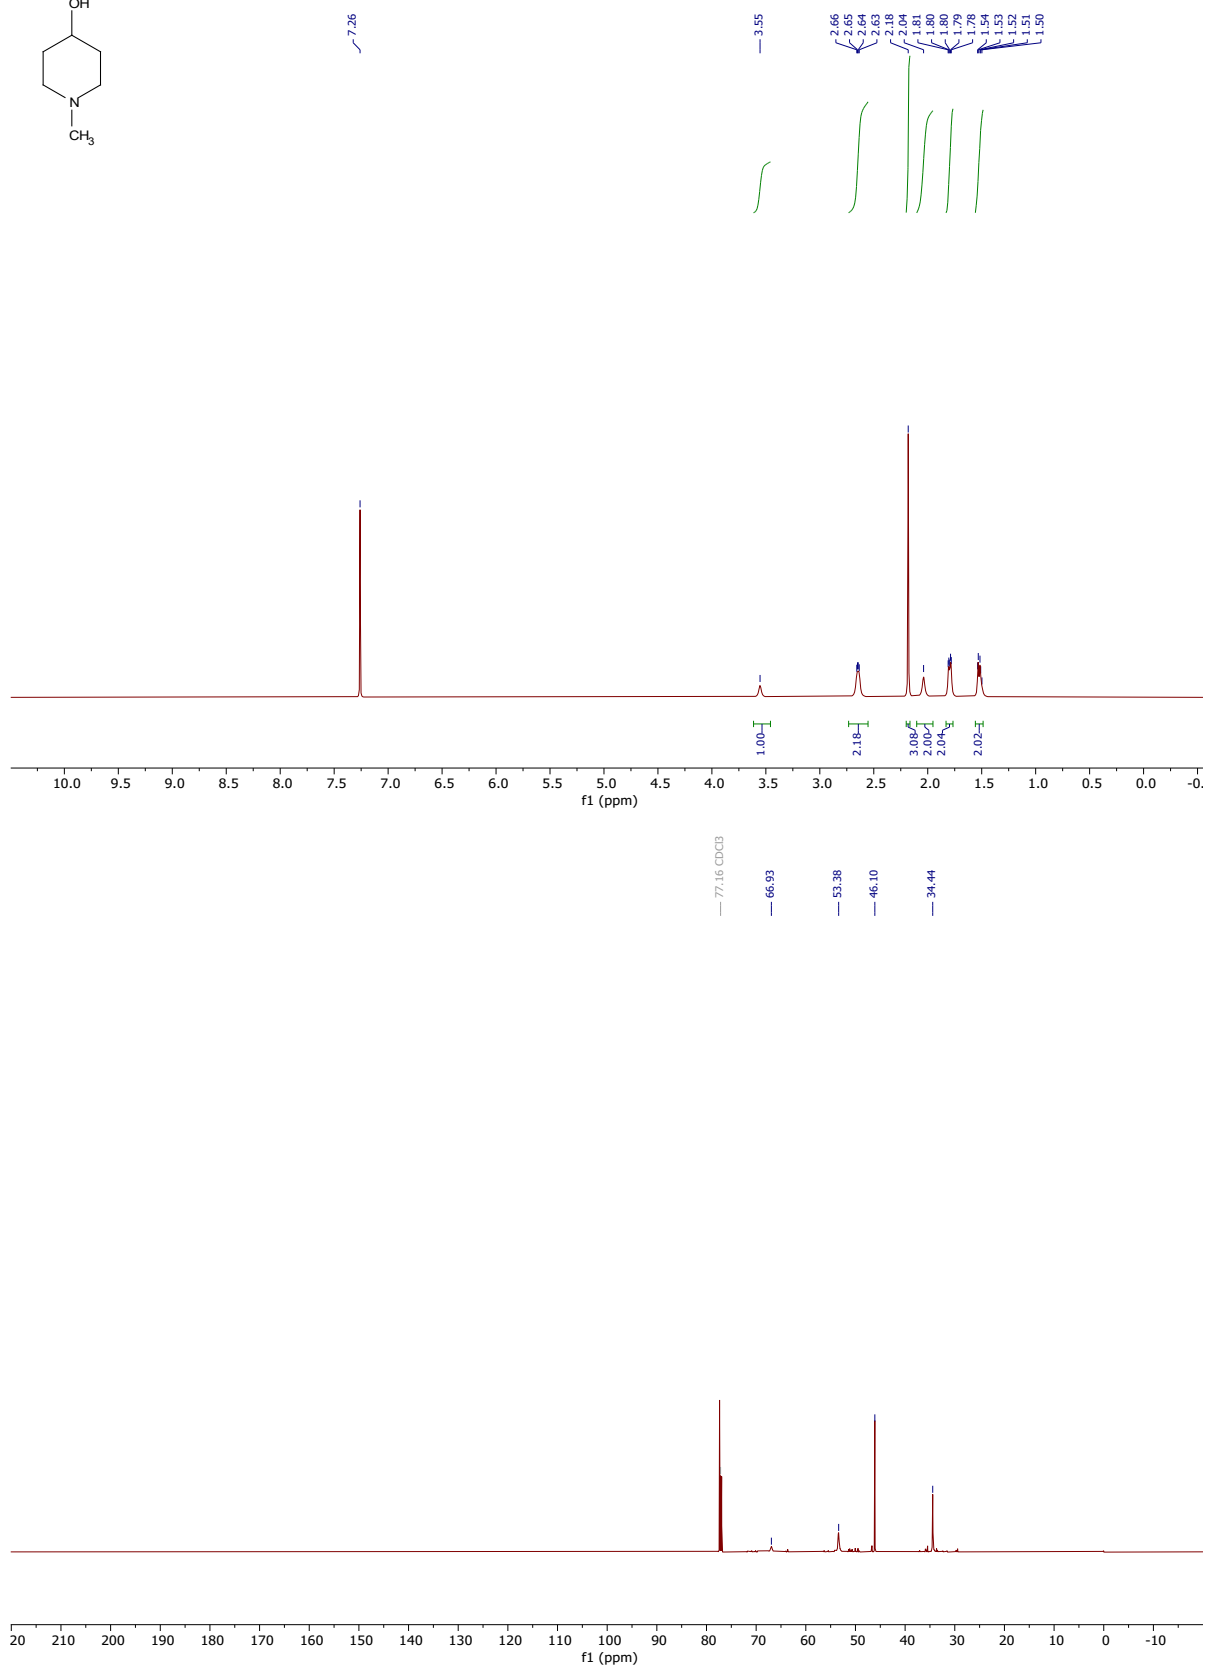

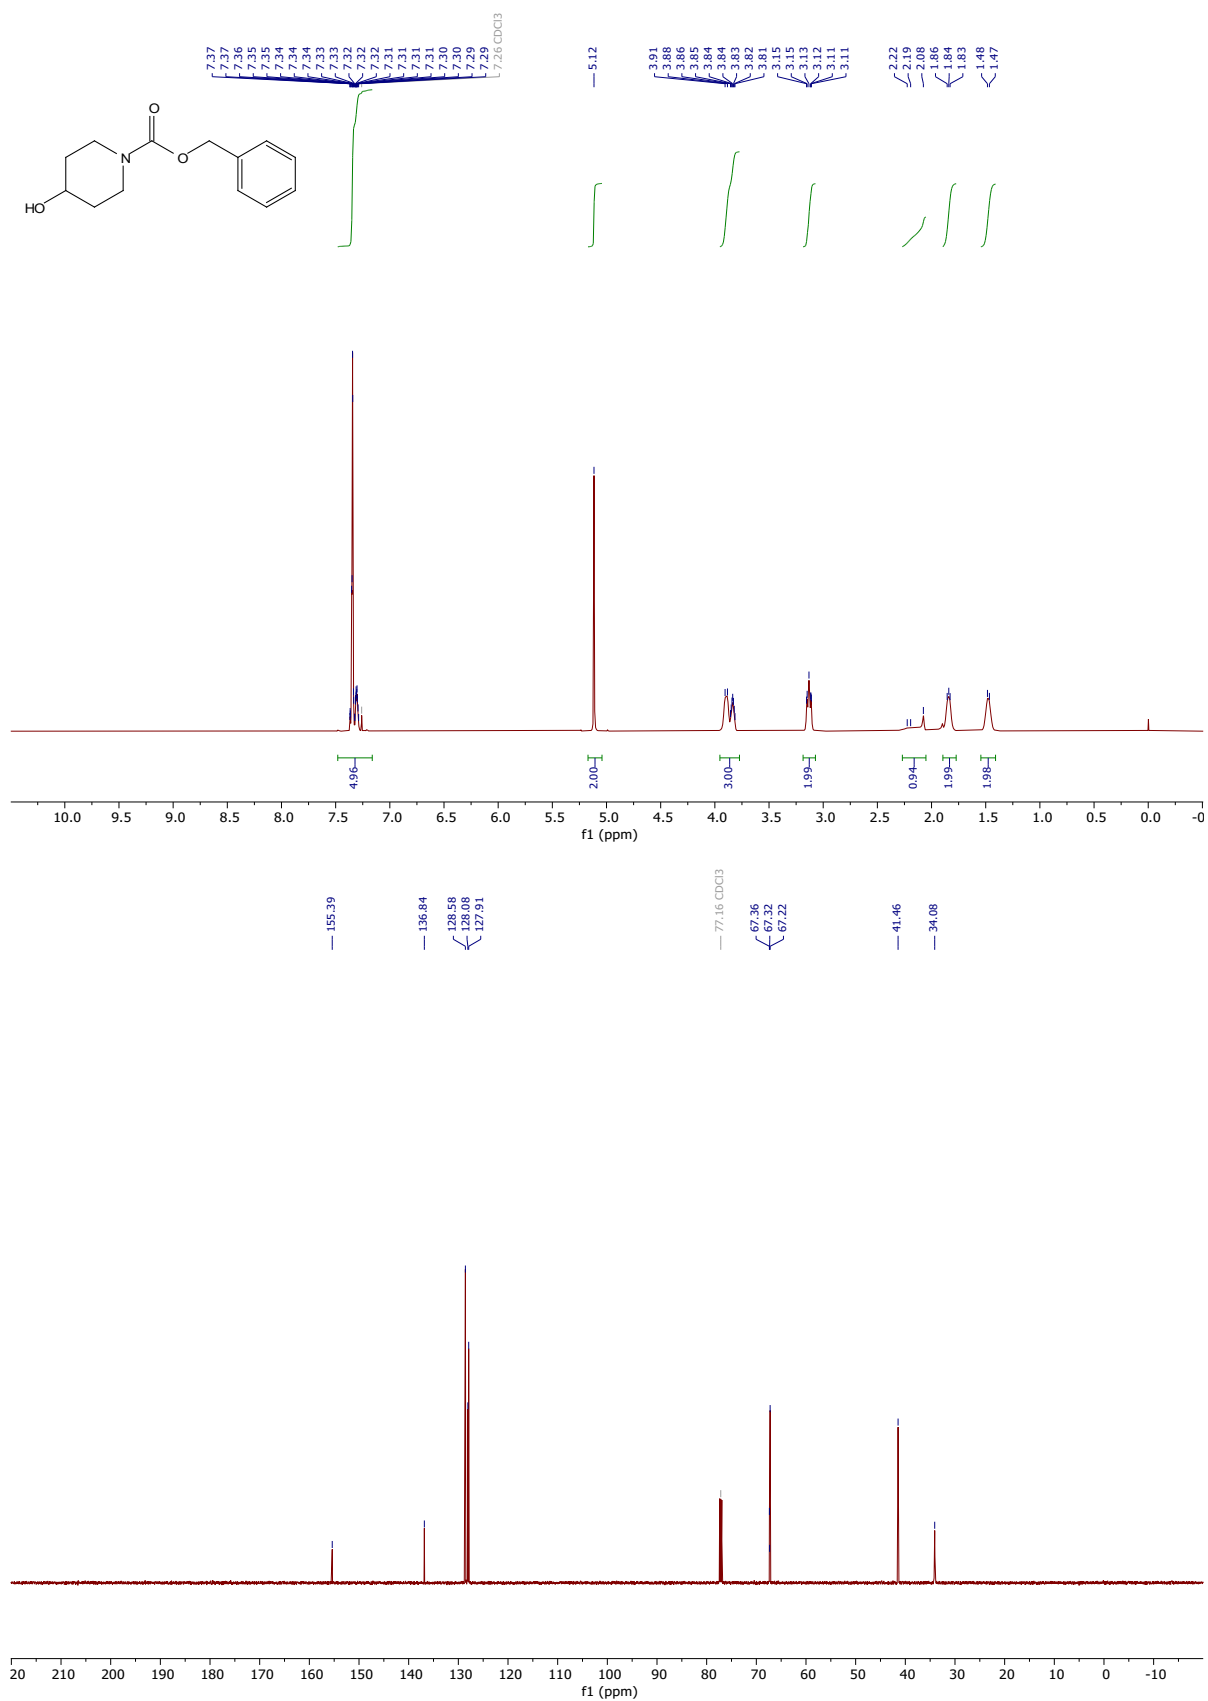

S63

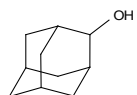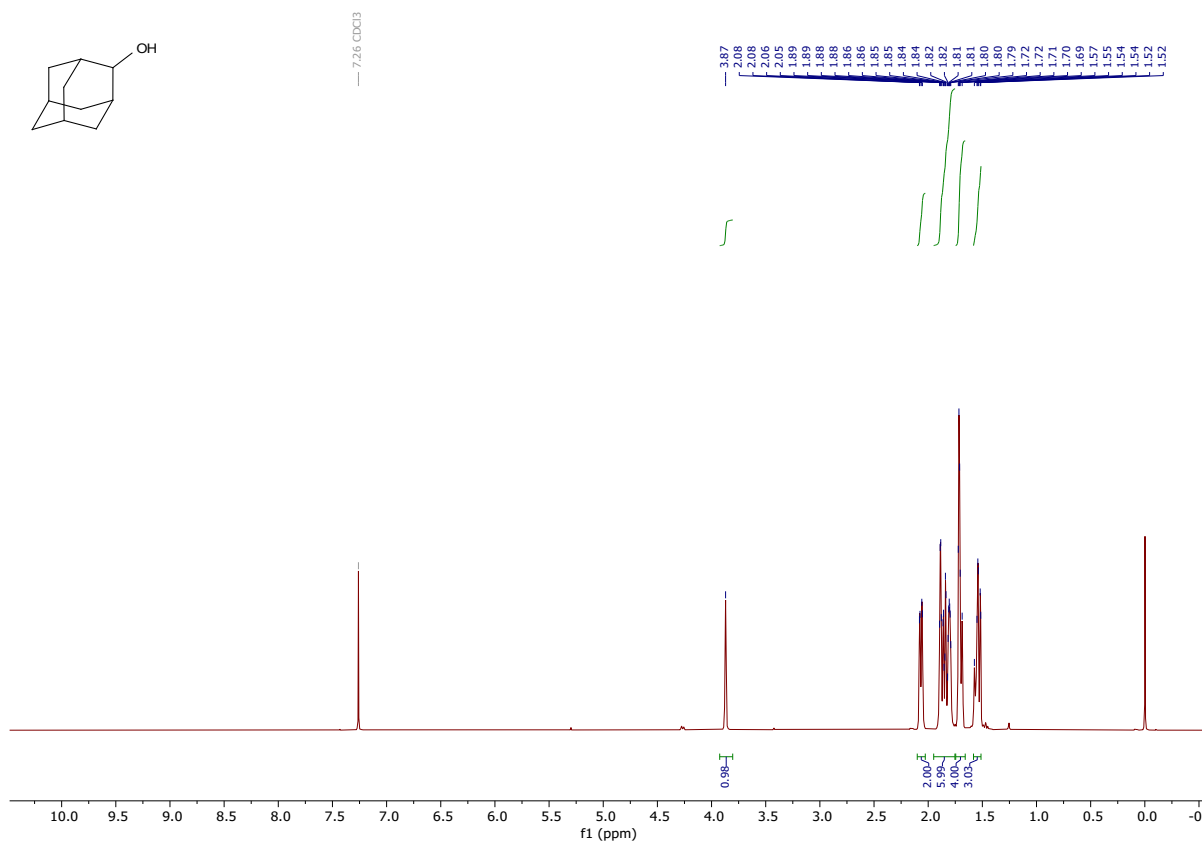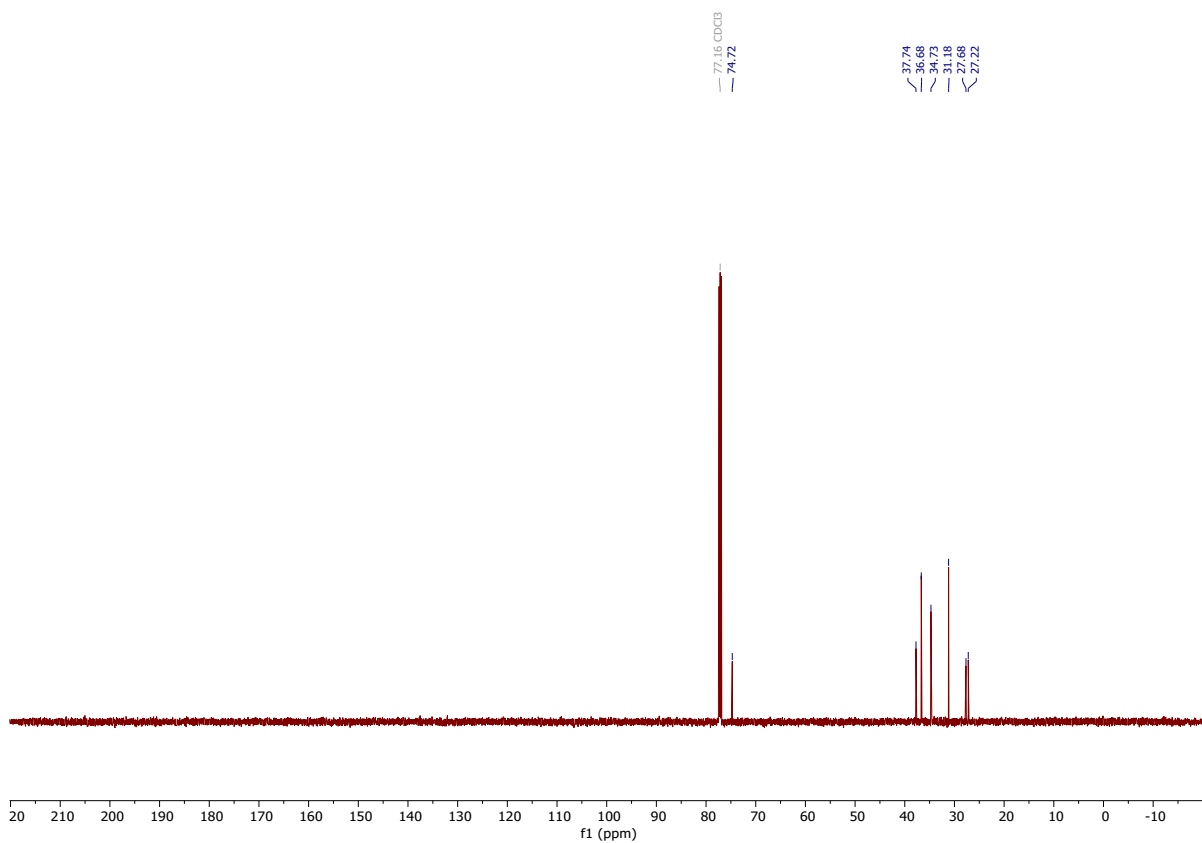

S64

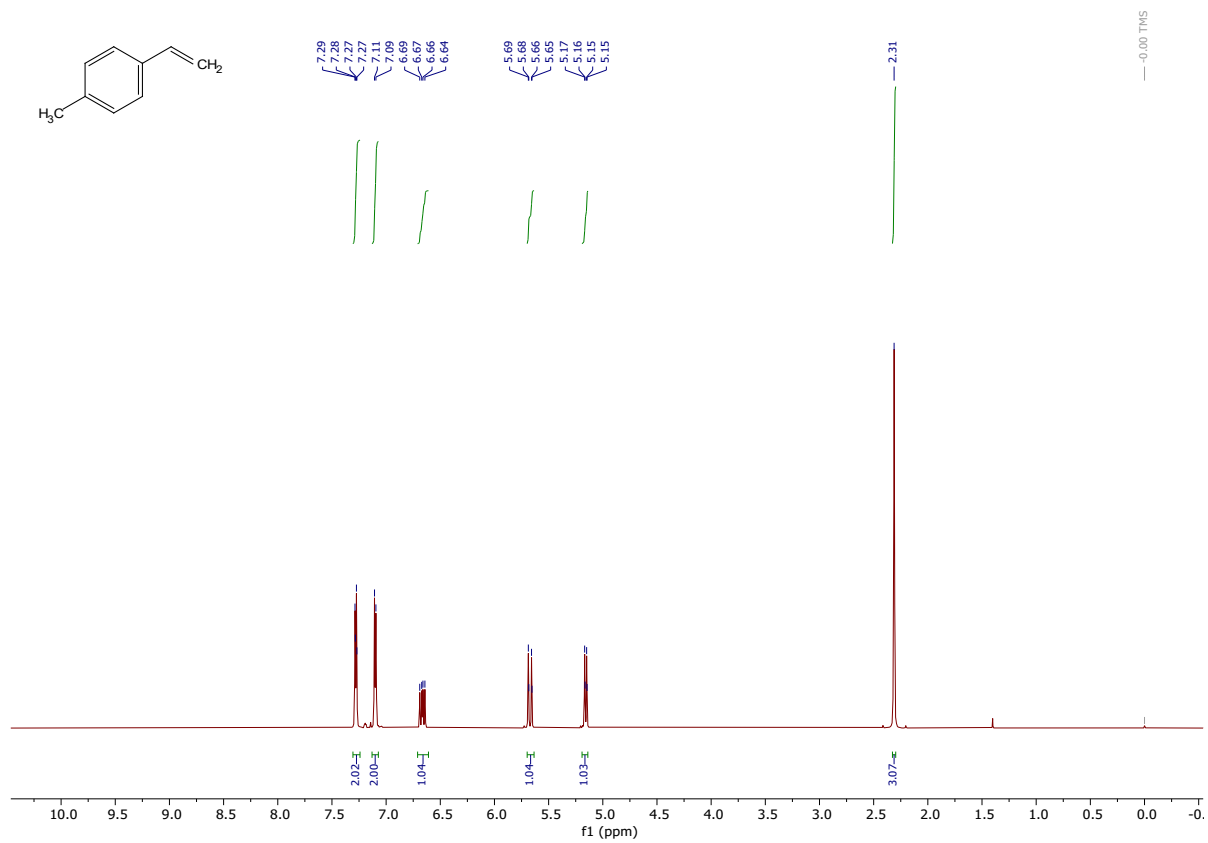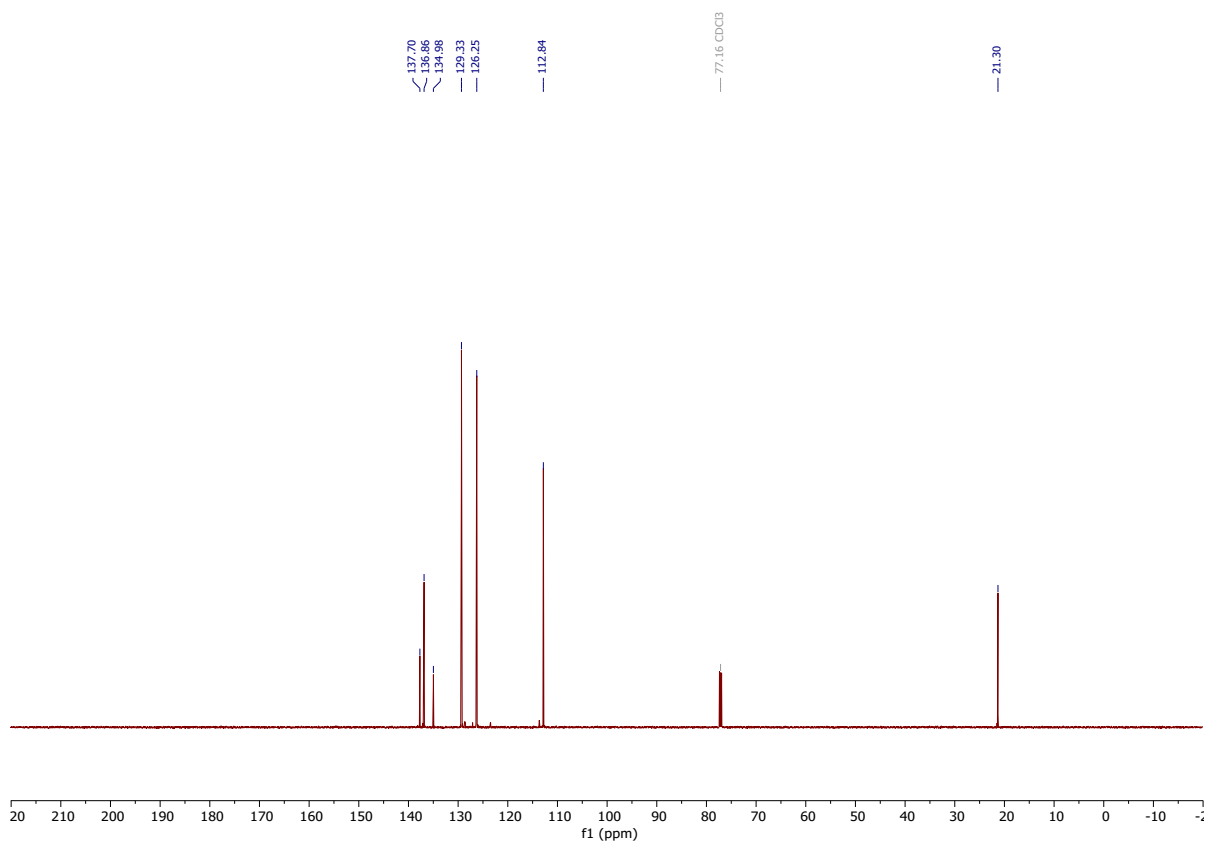

S65

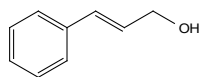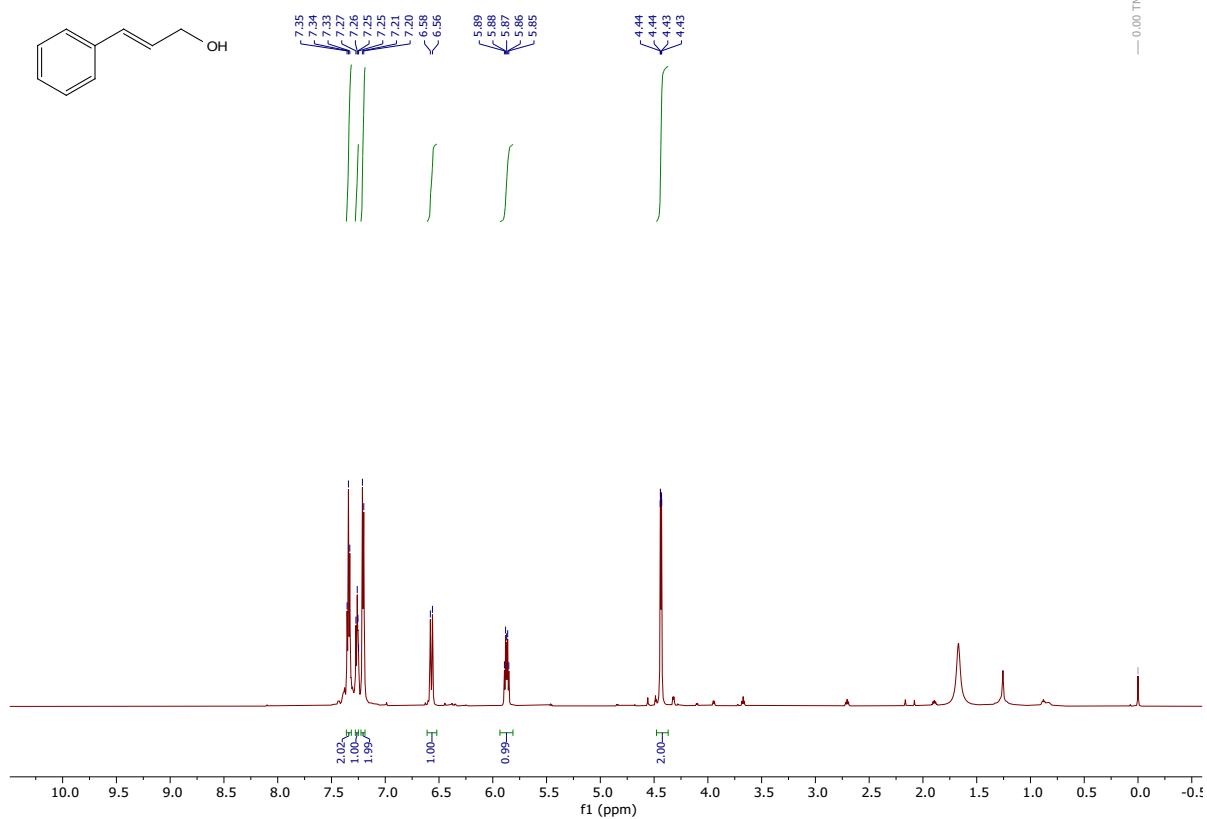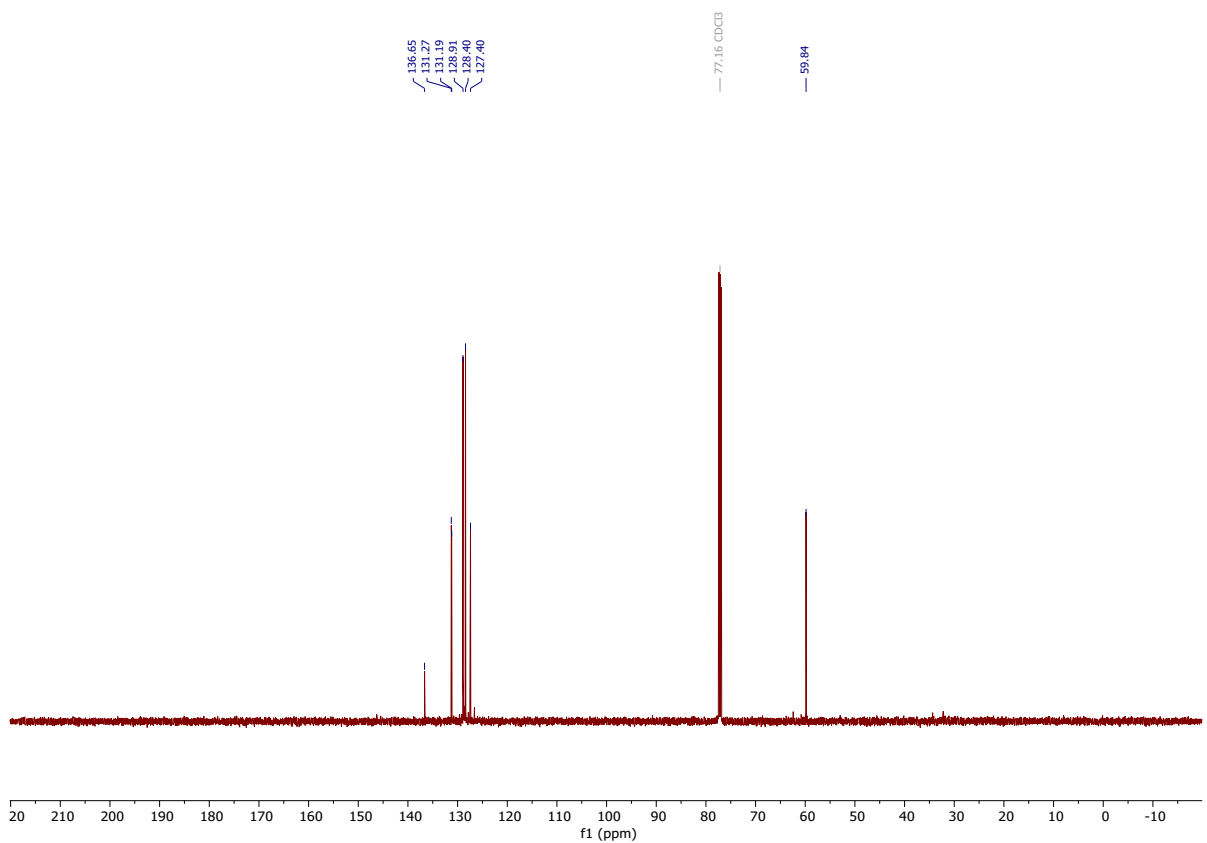

S66

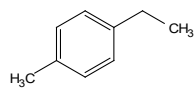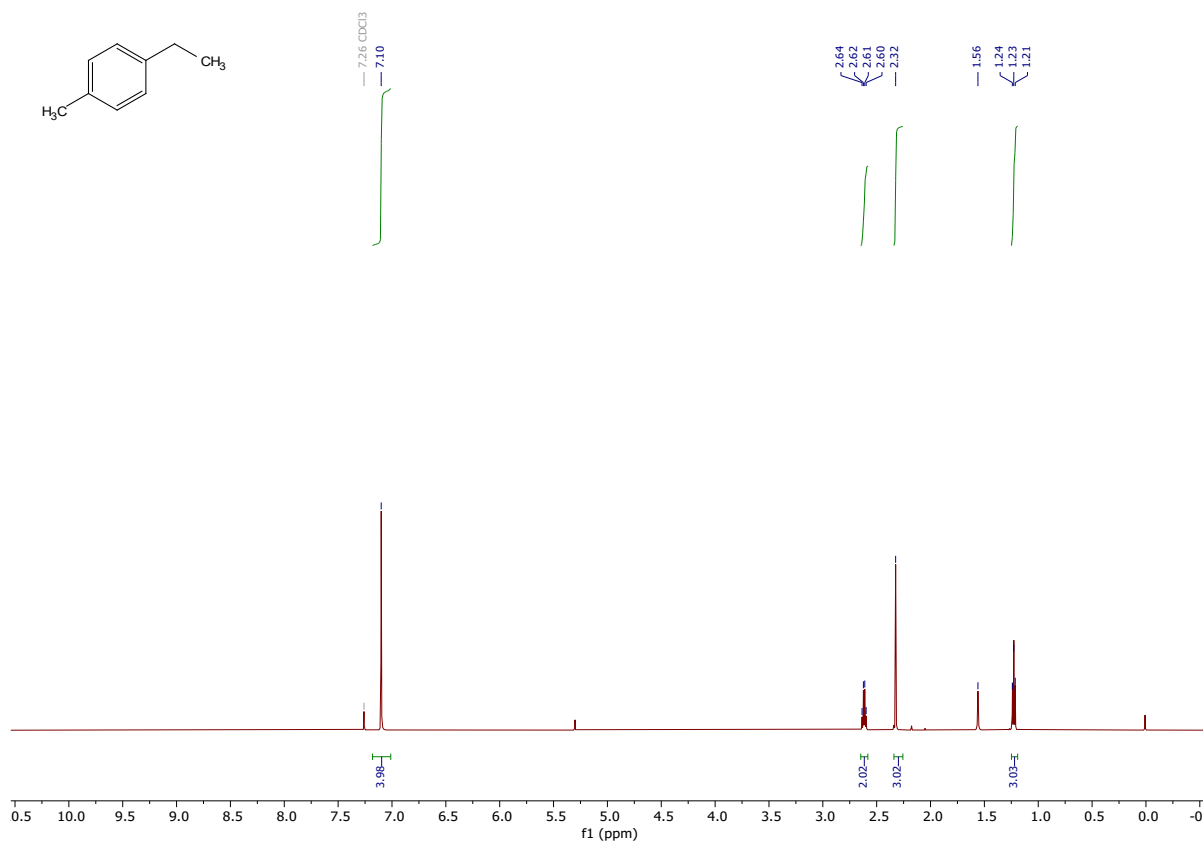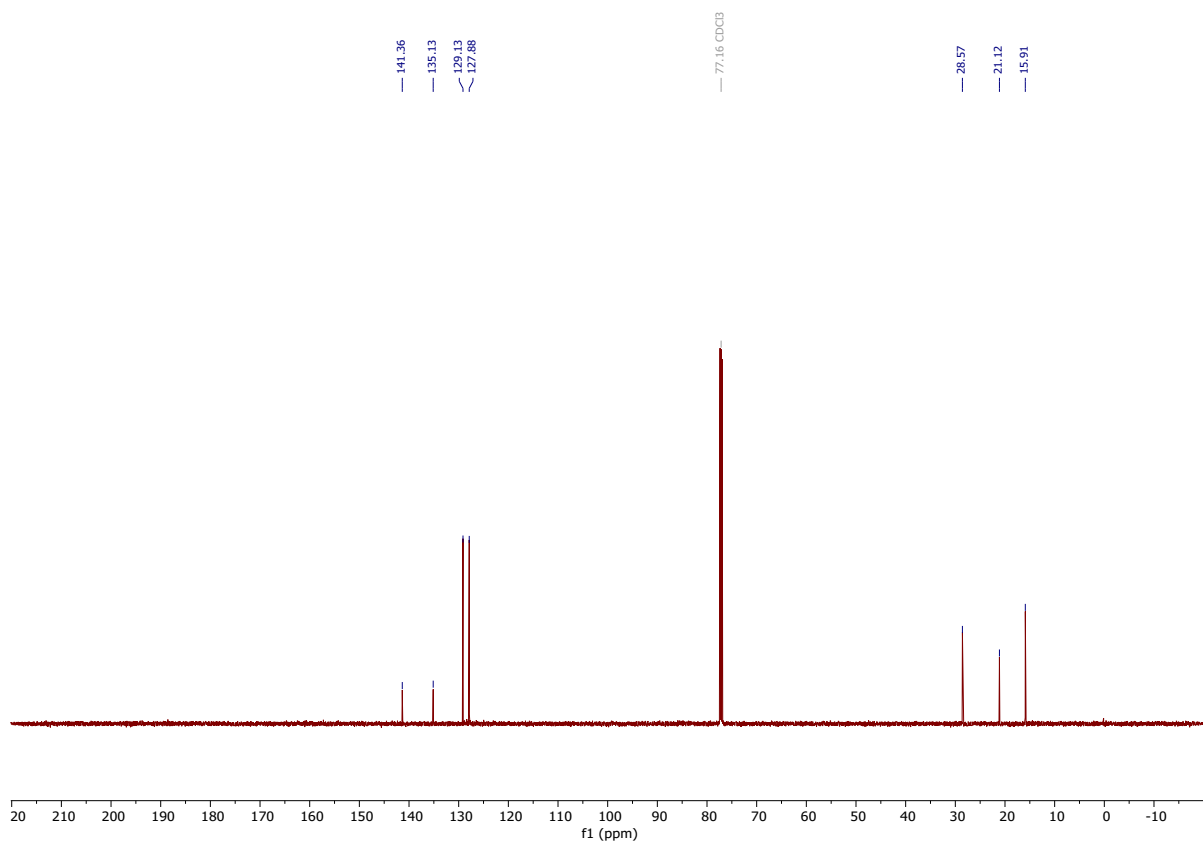

S67

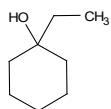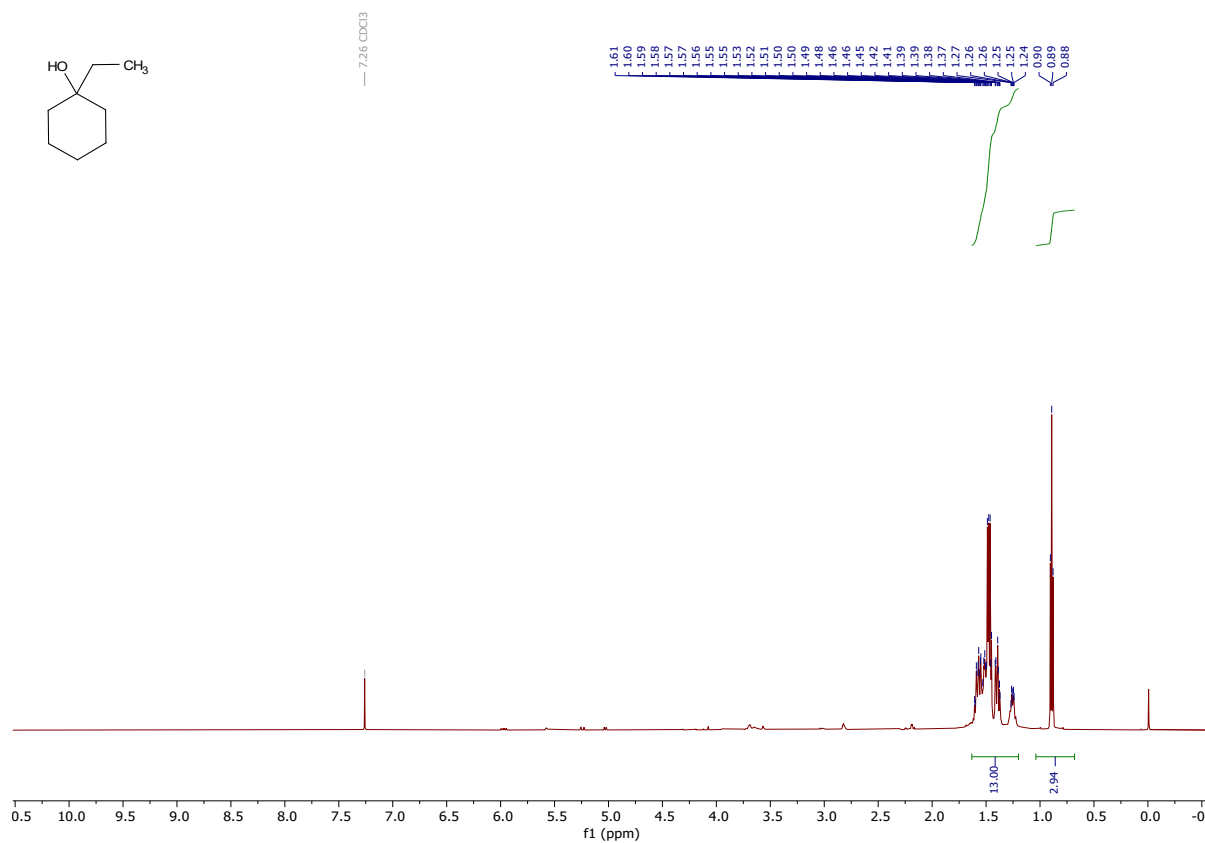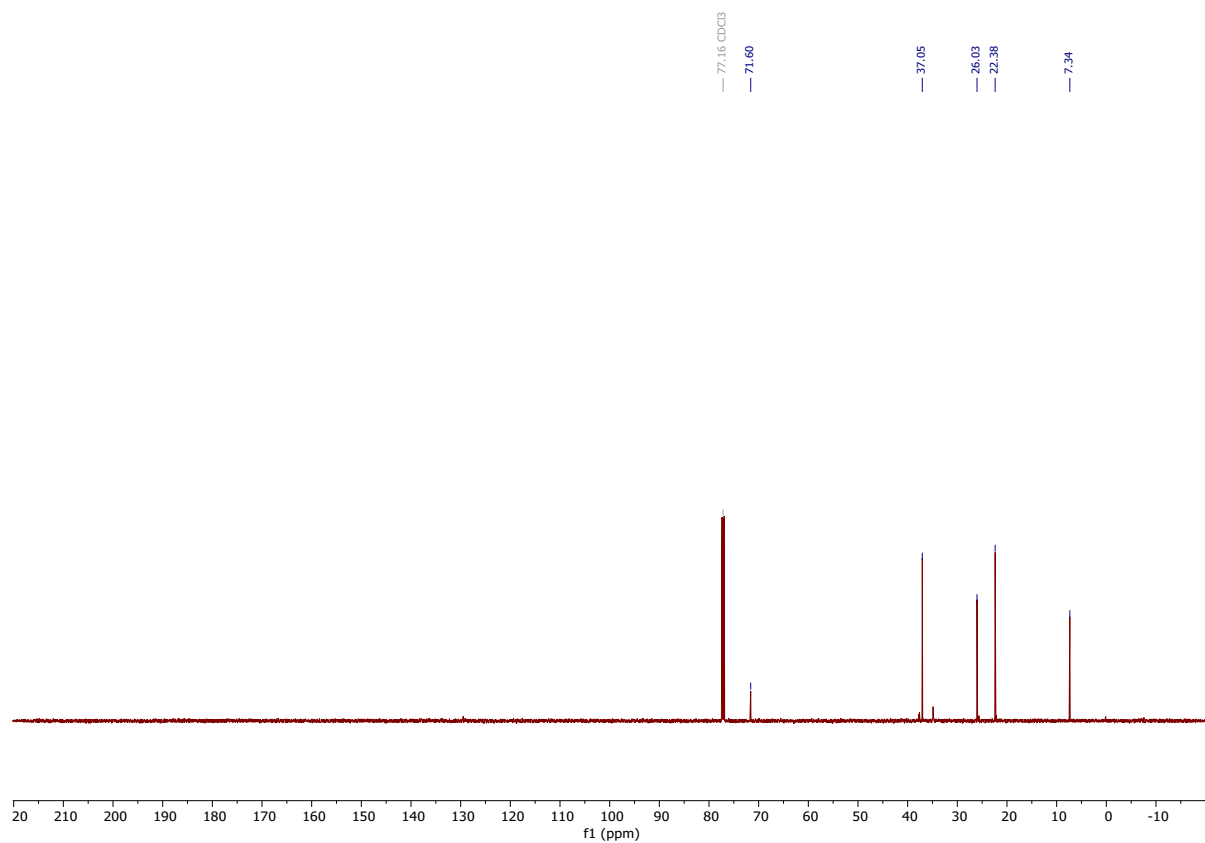

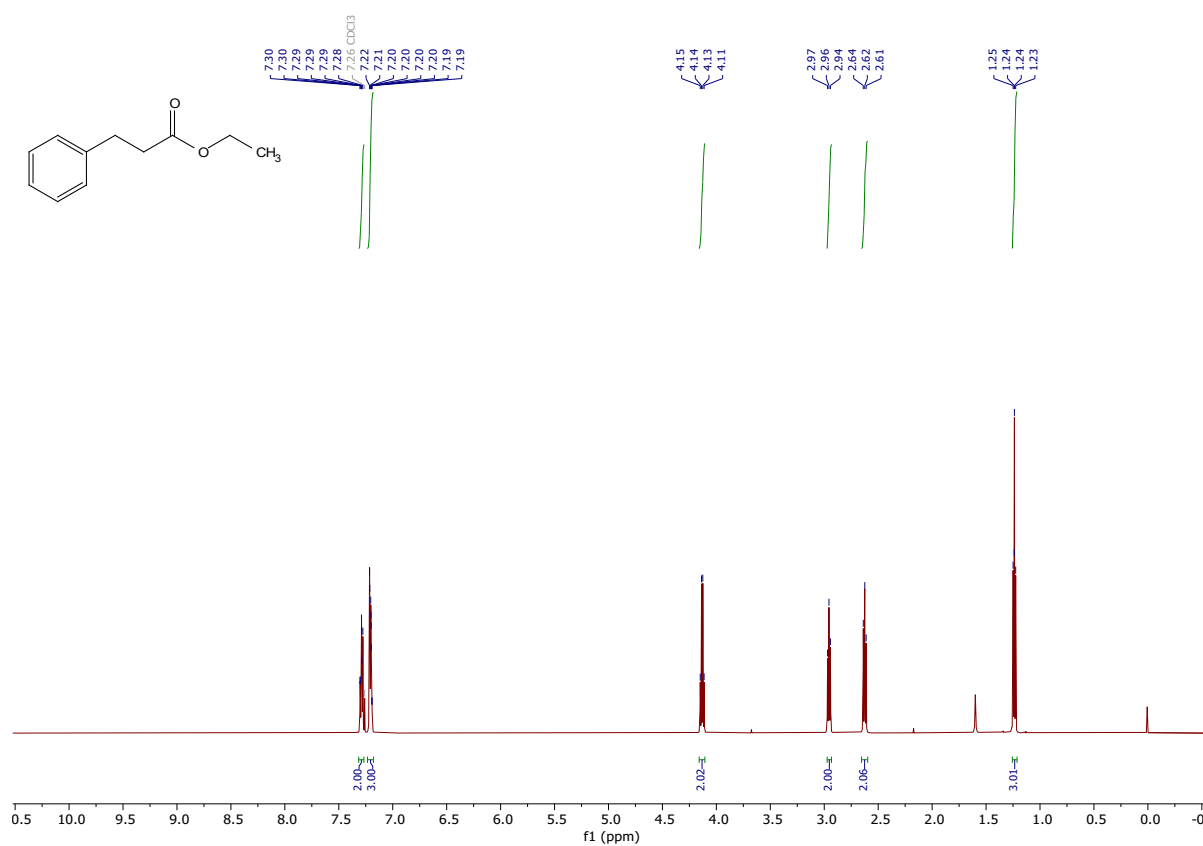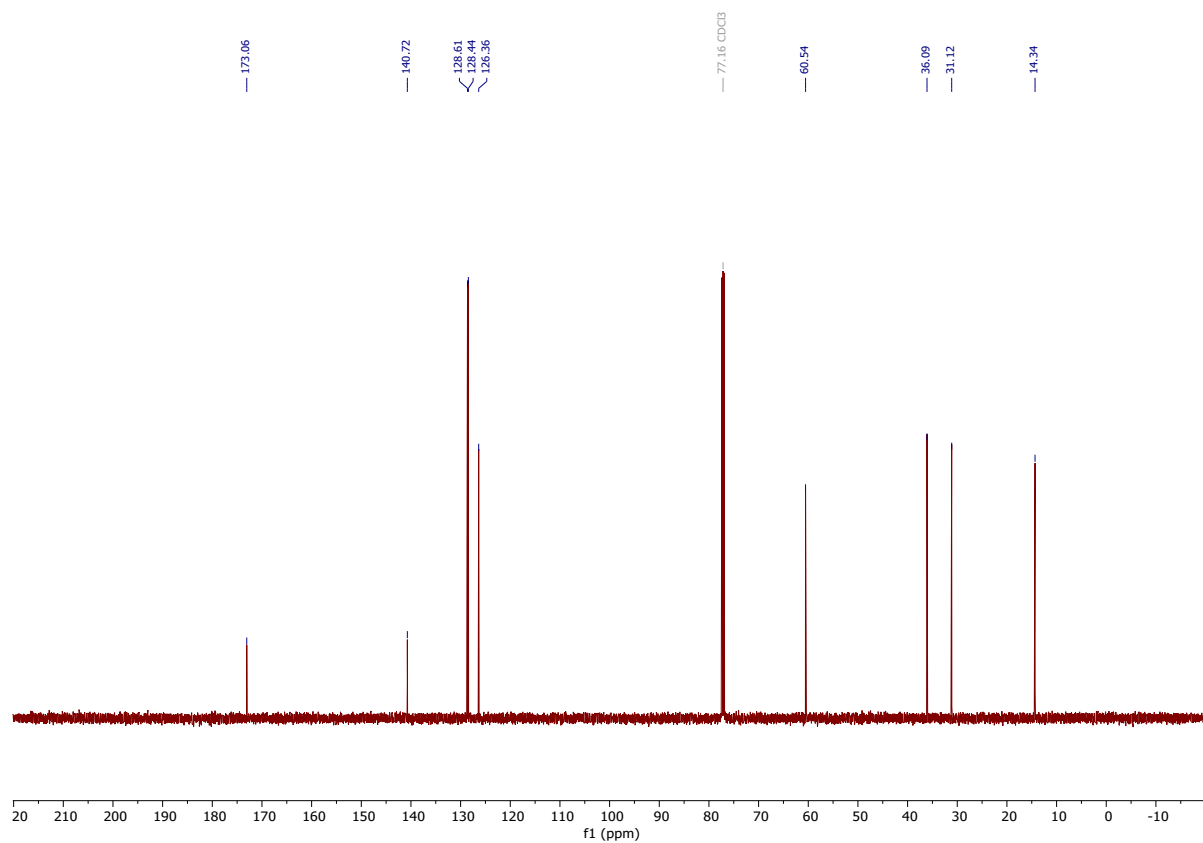

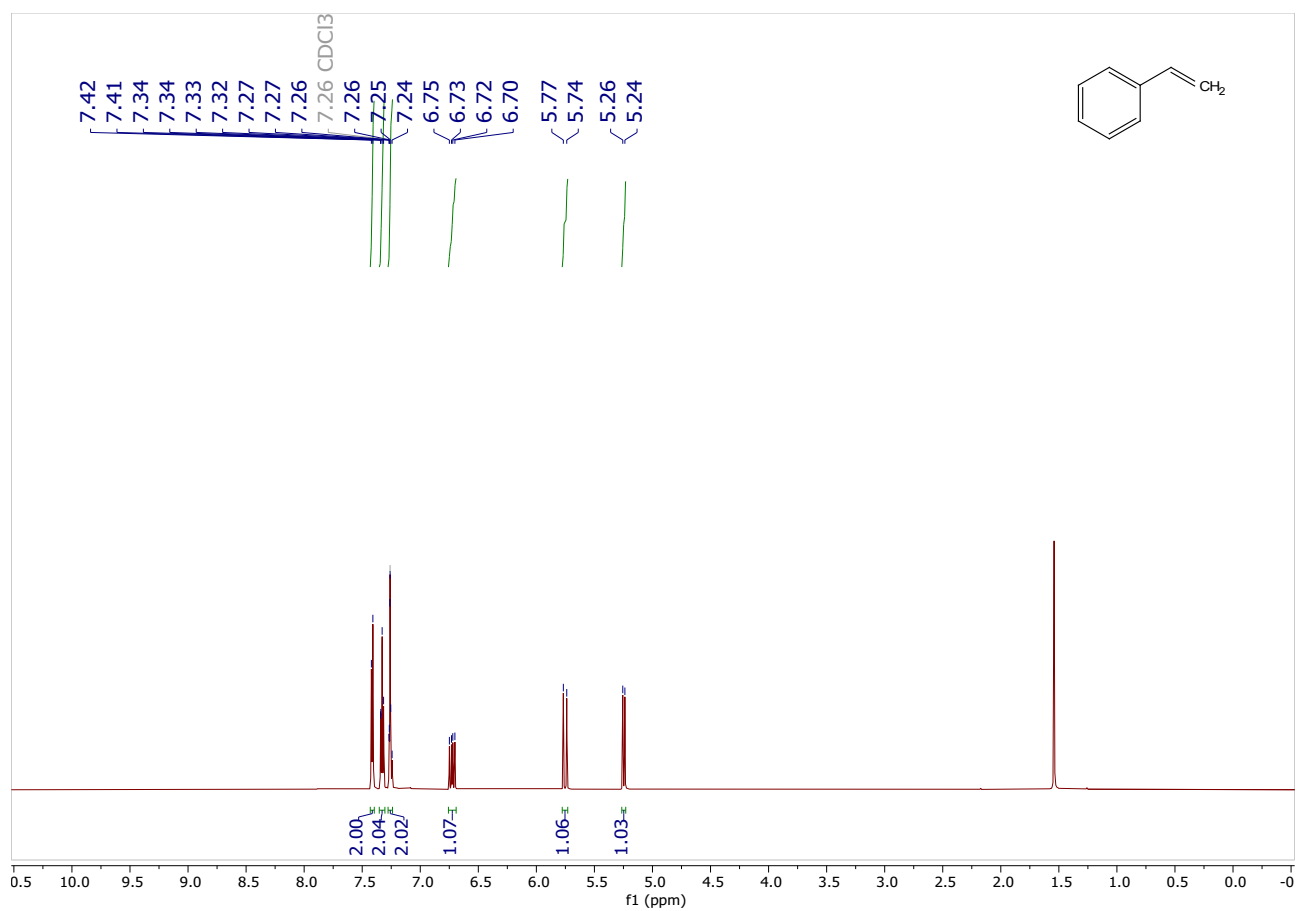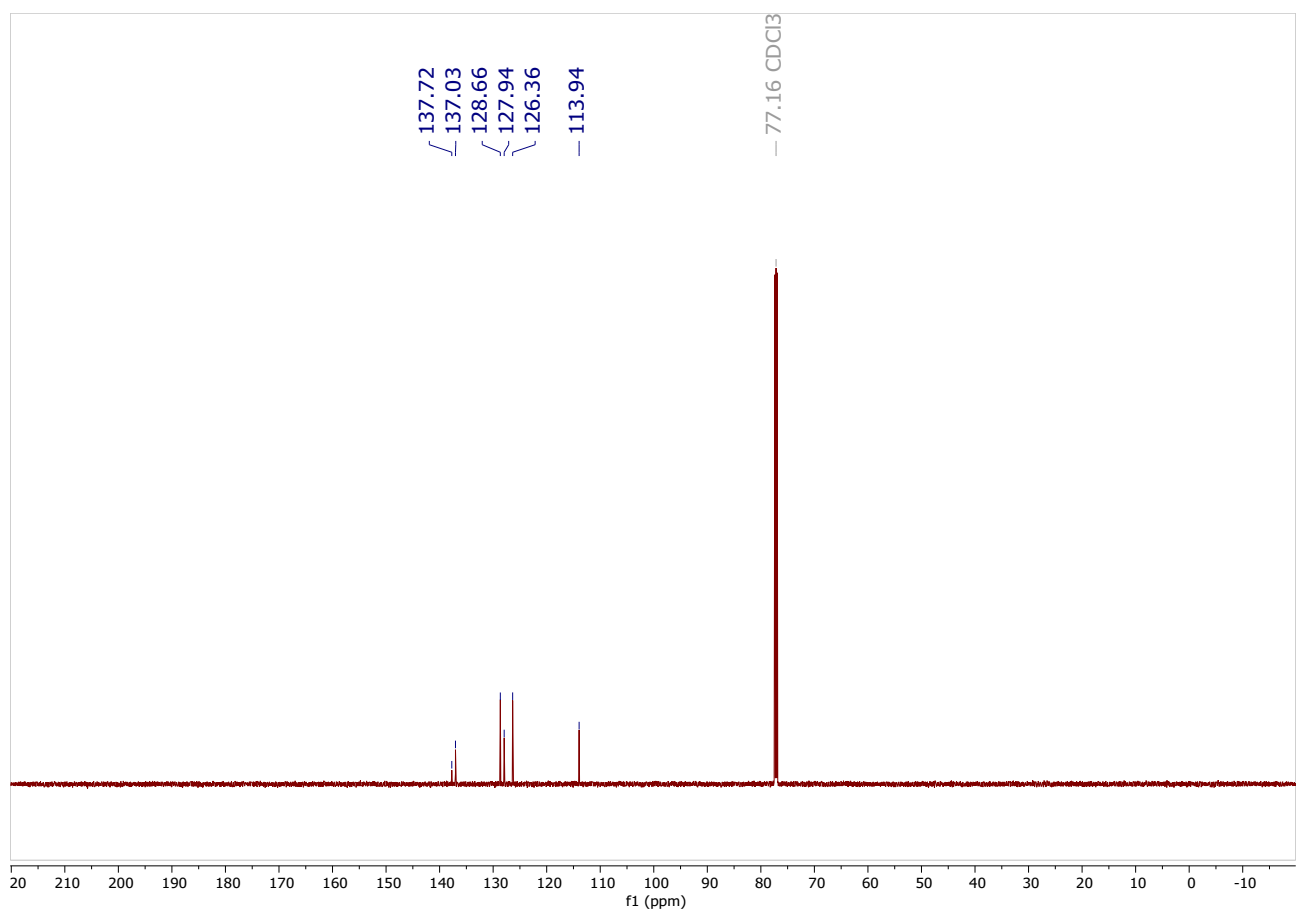

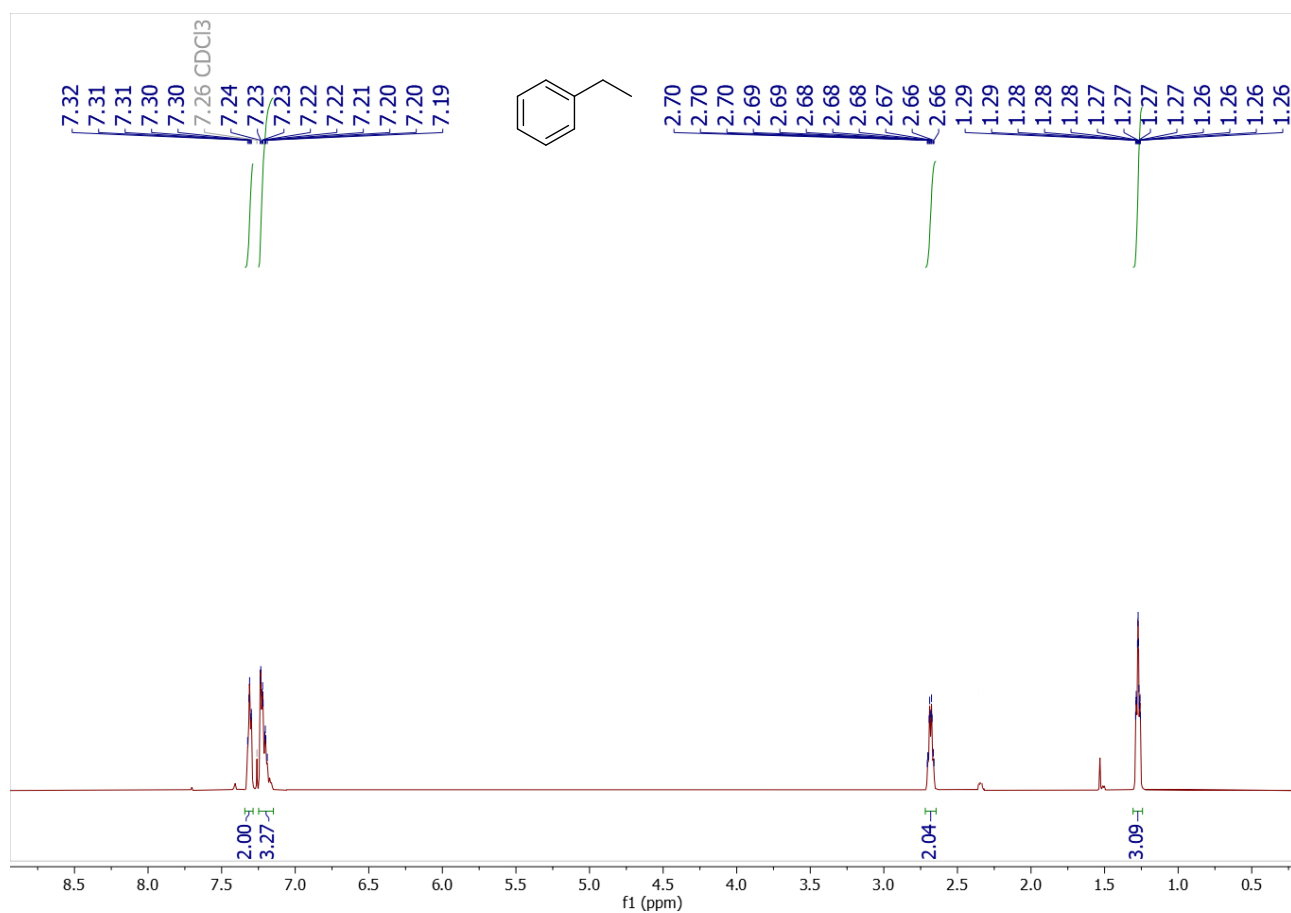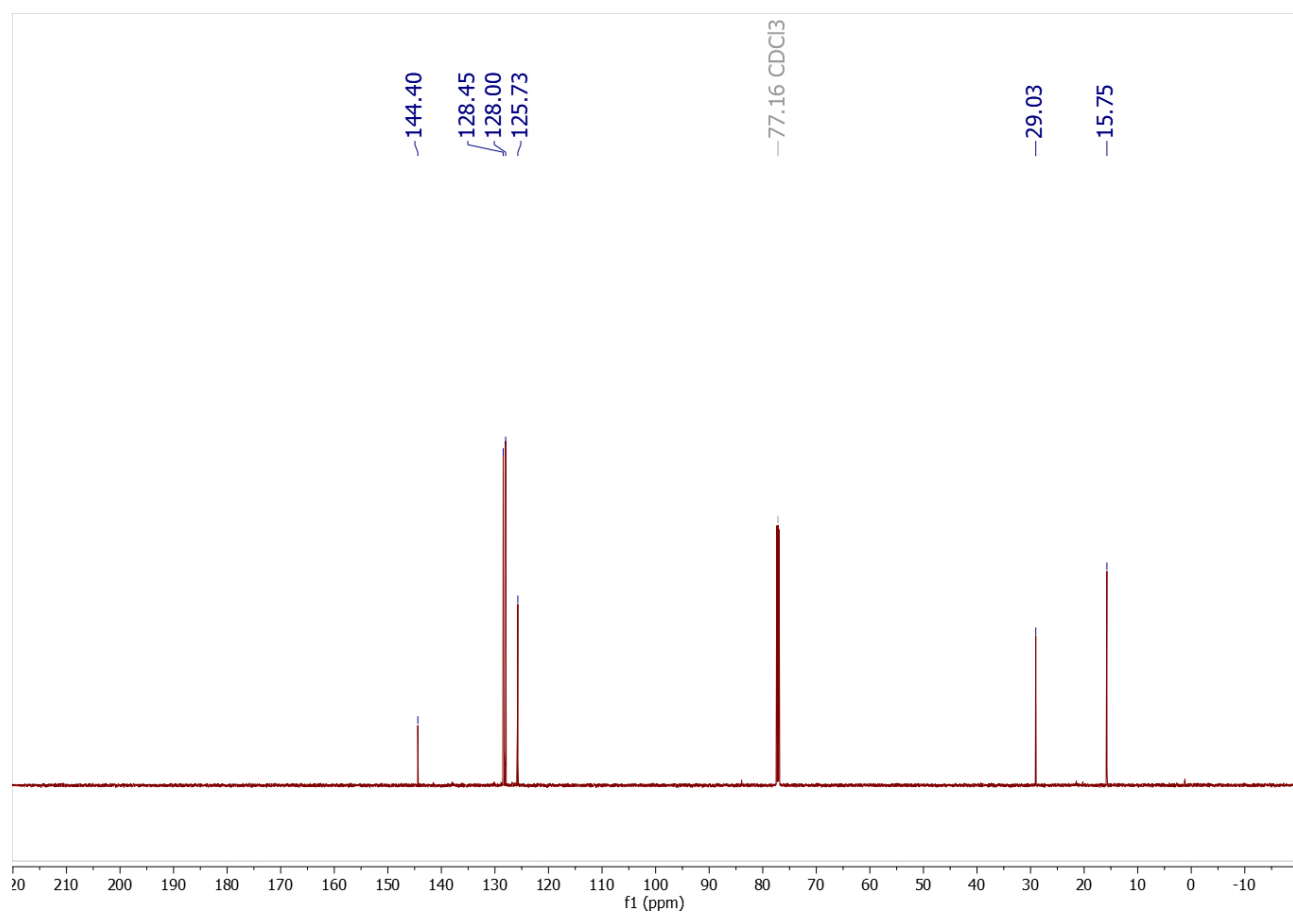

S71

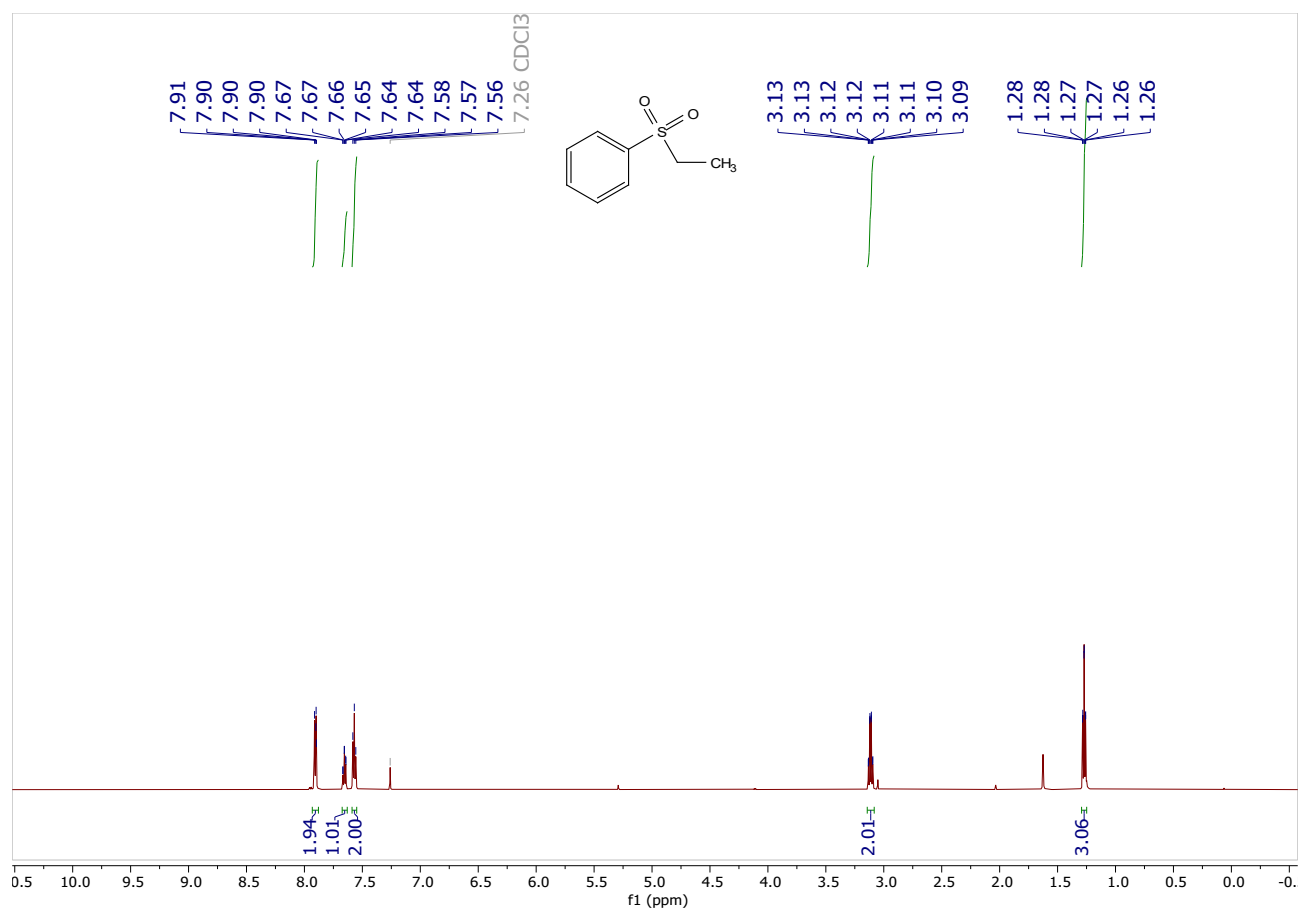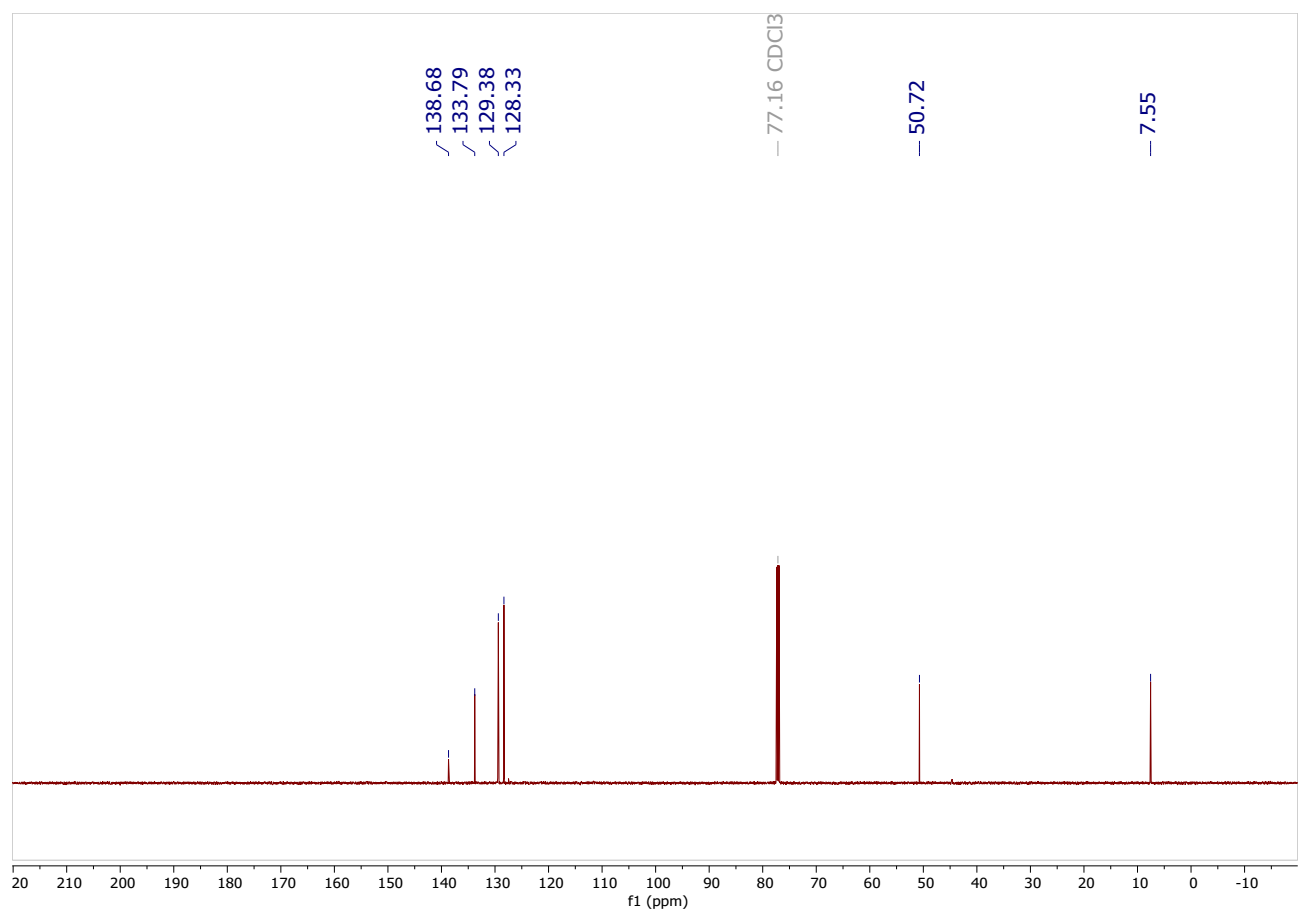

S72

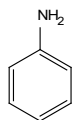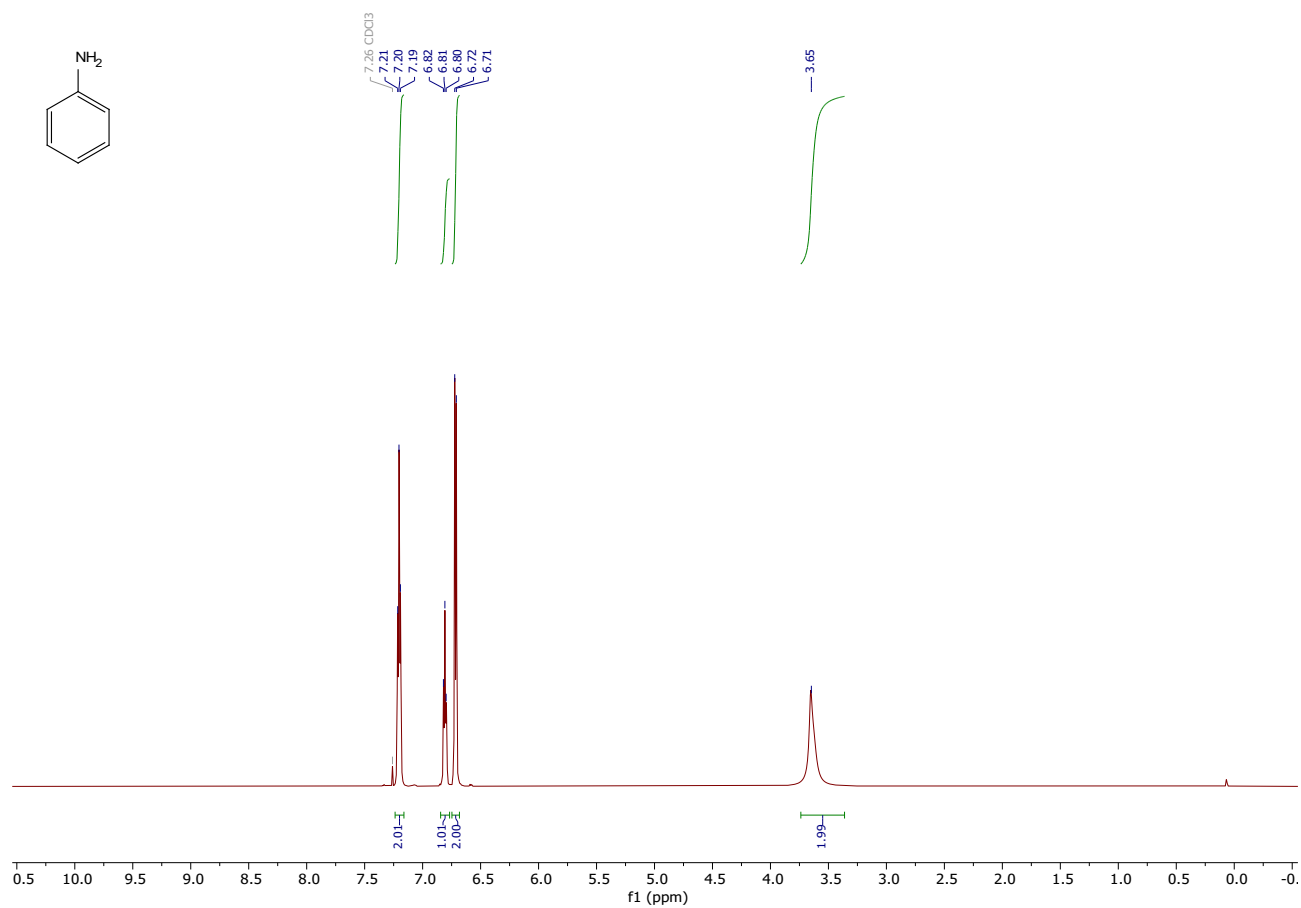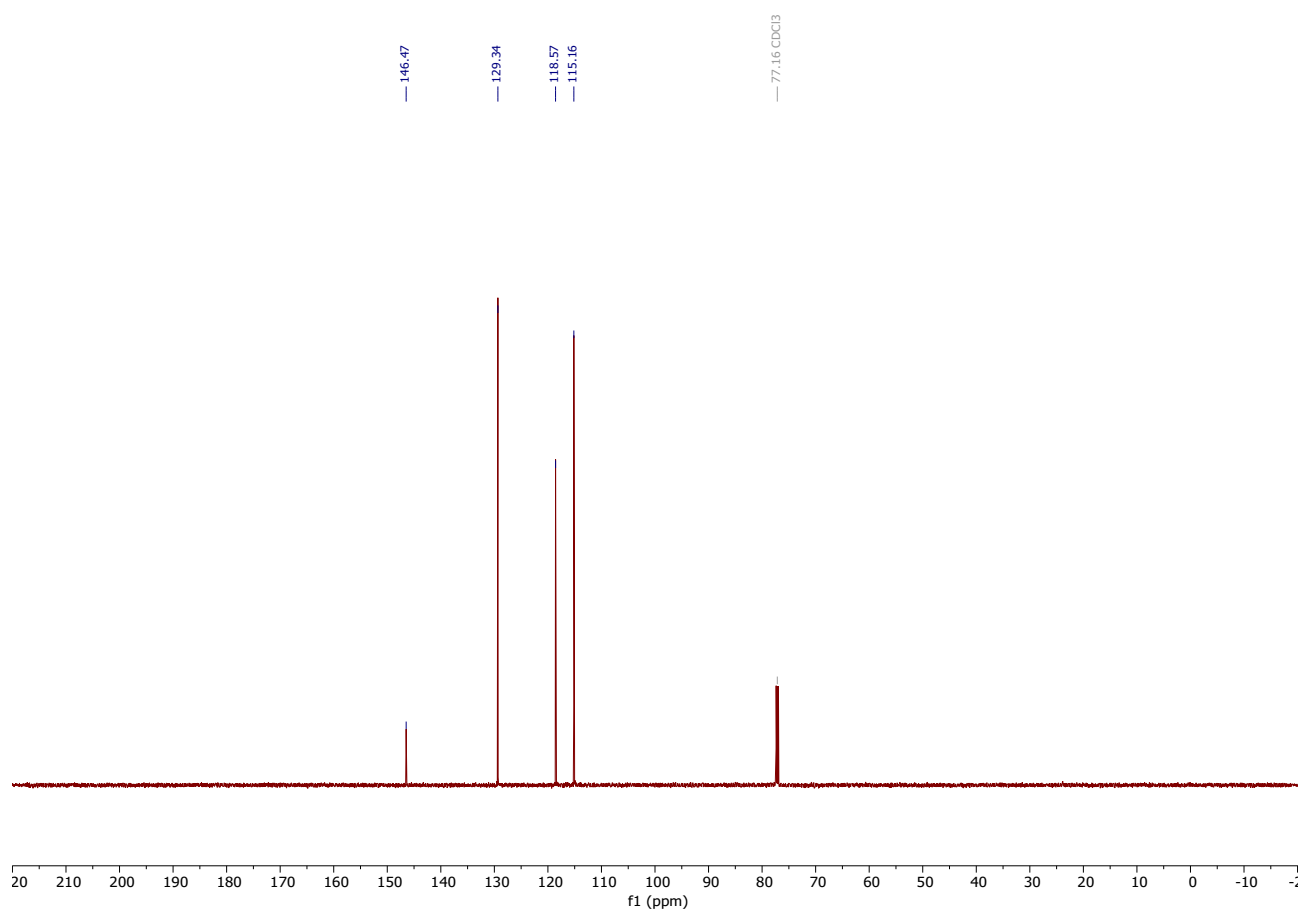

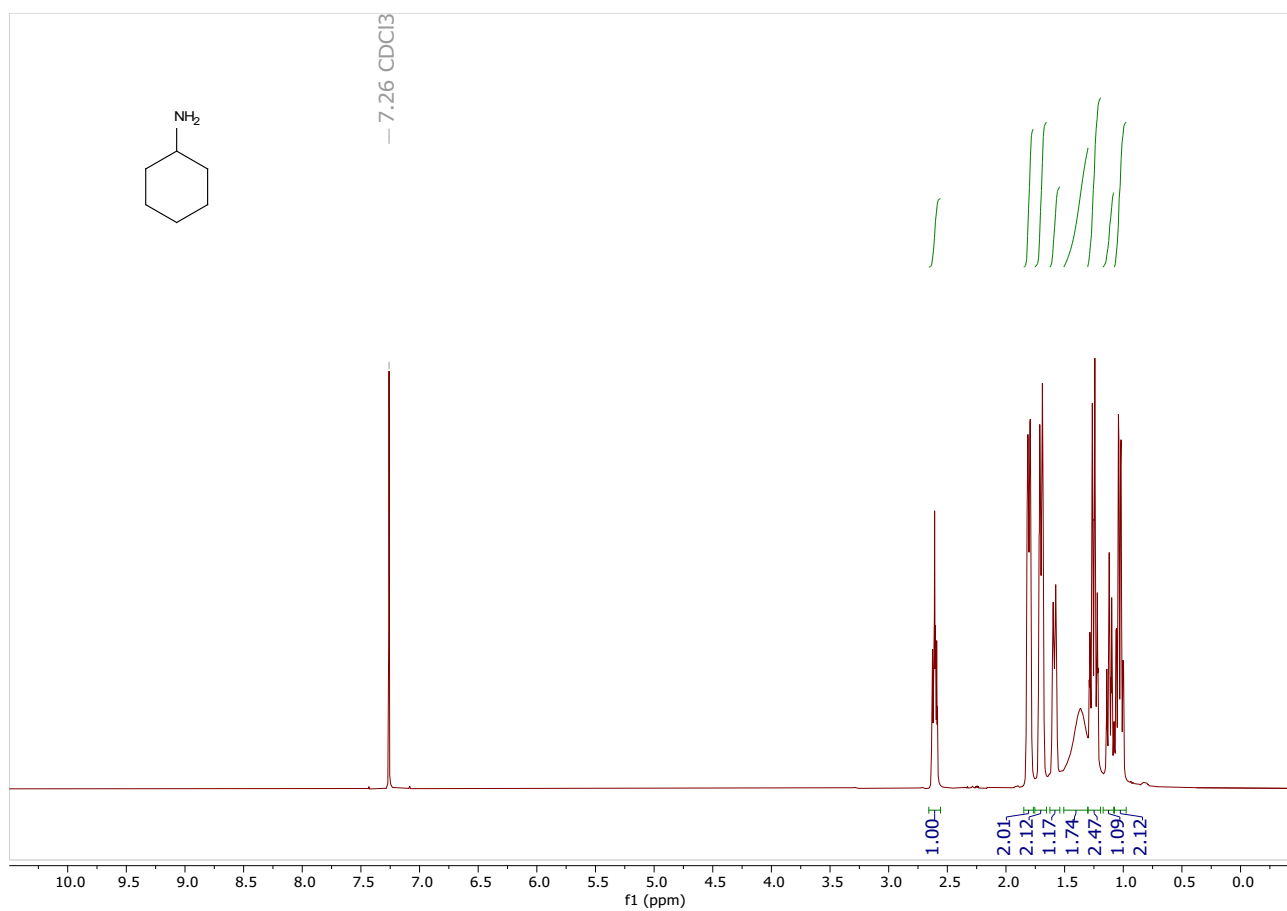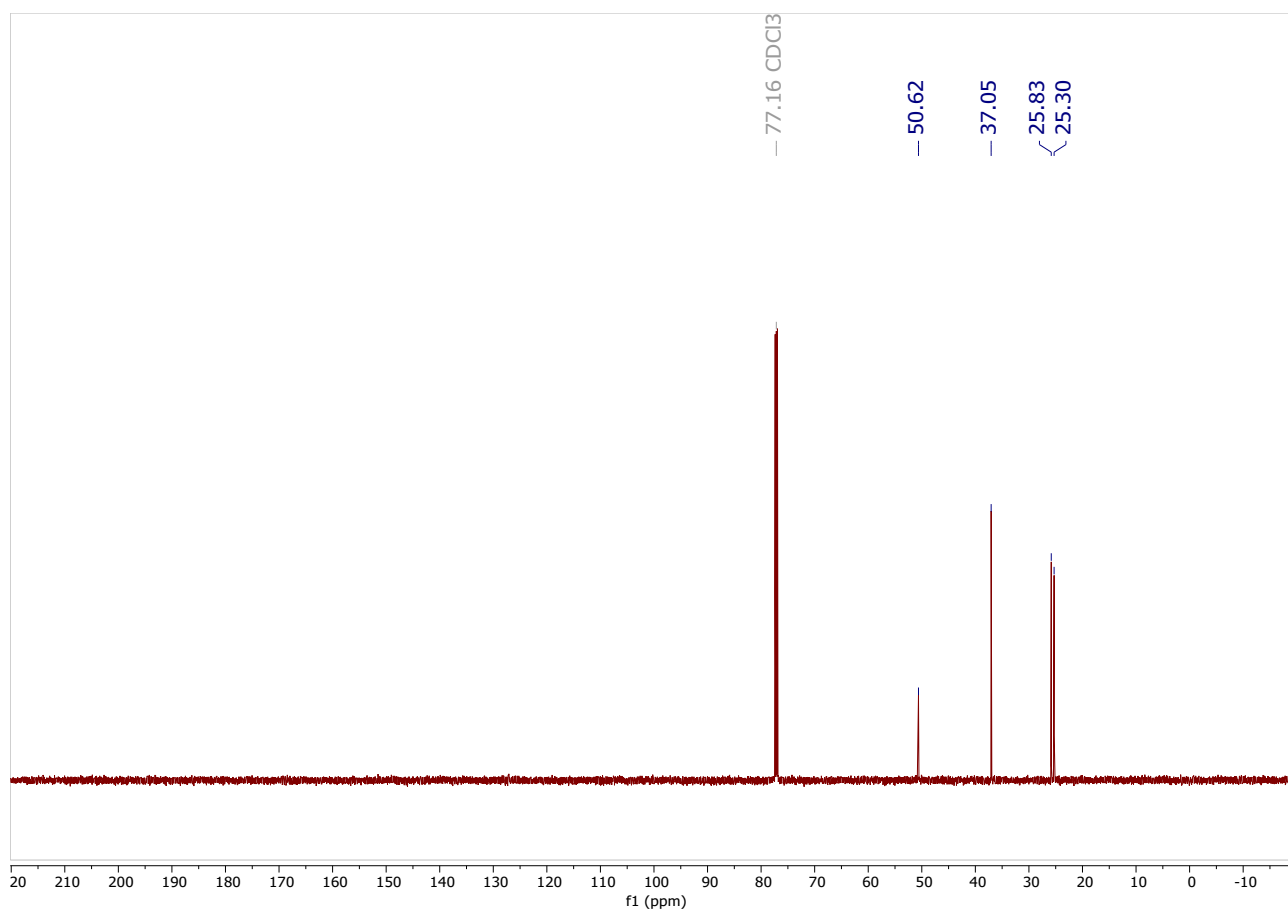

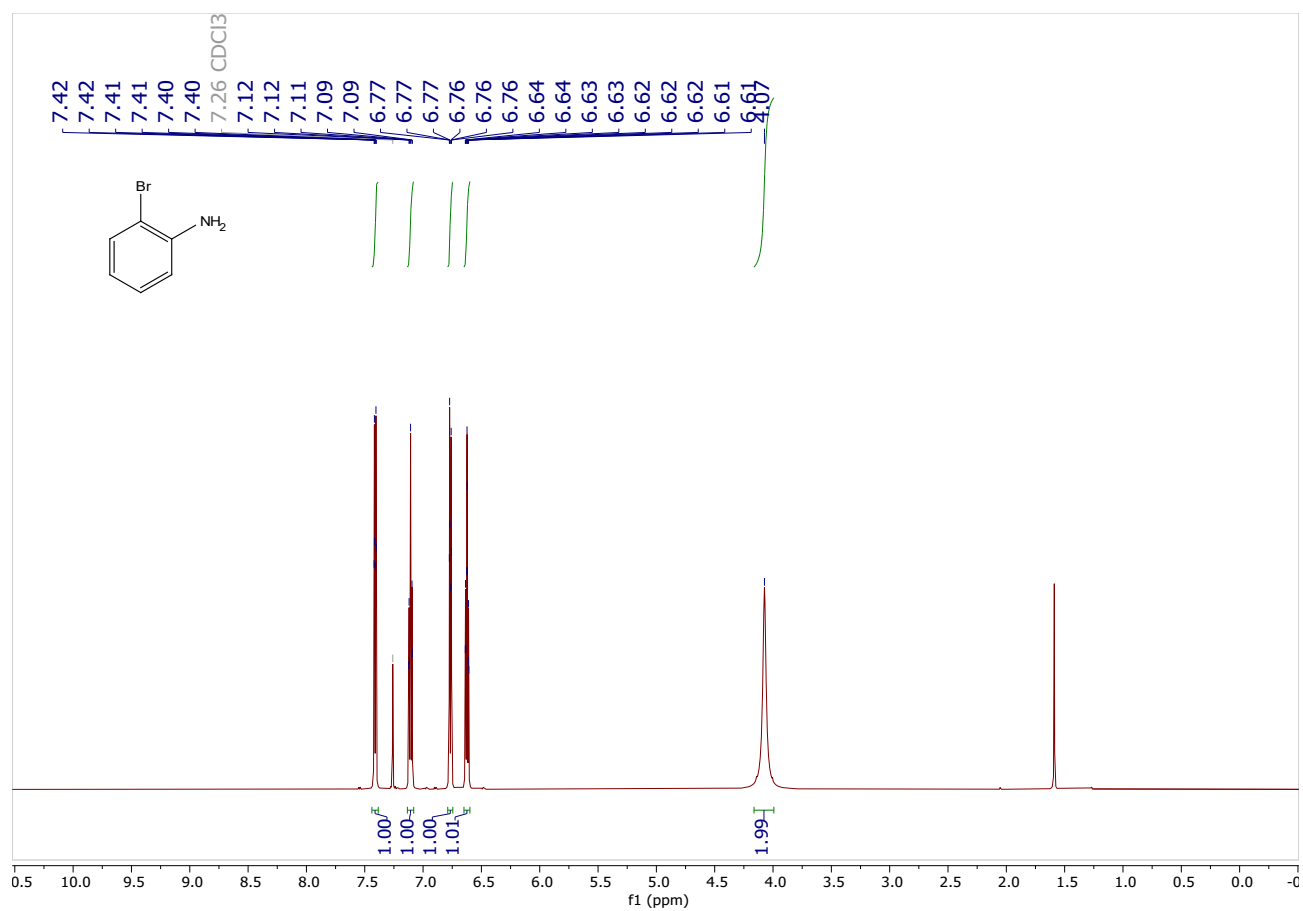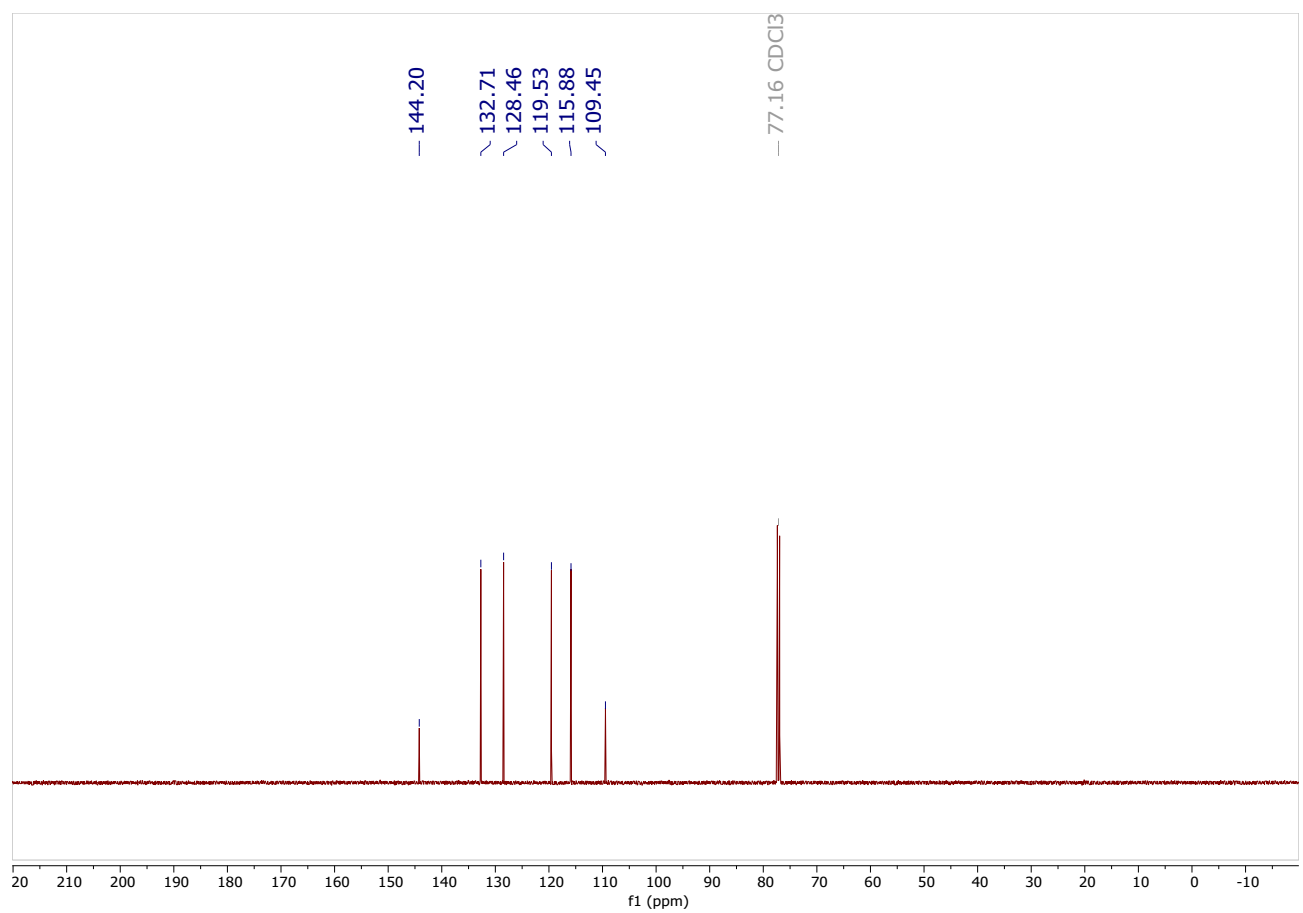

S75

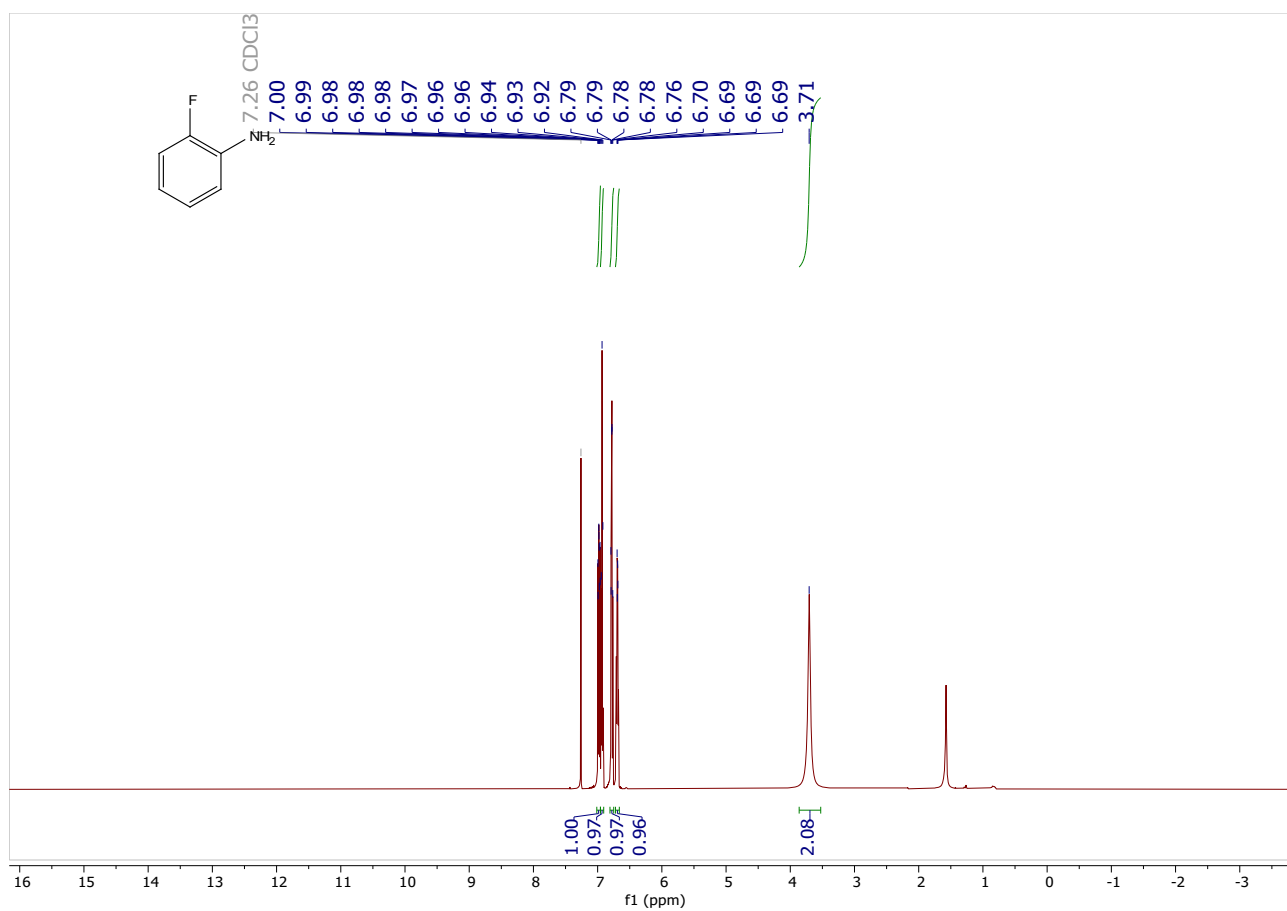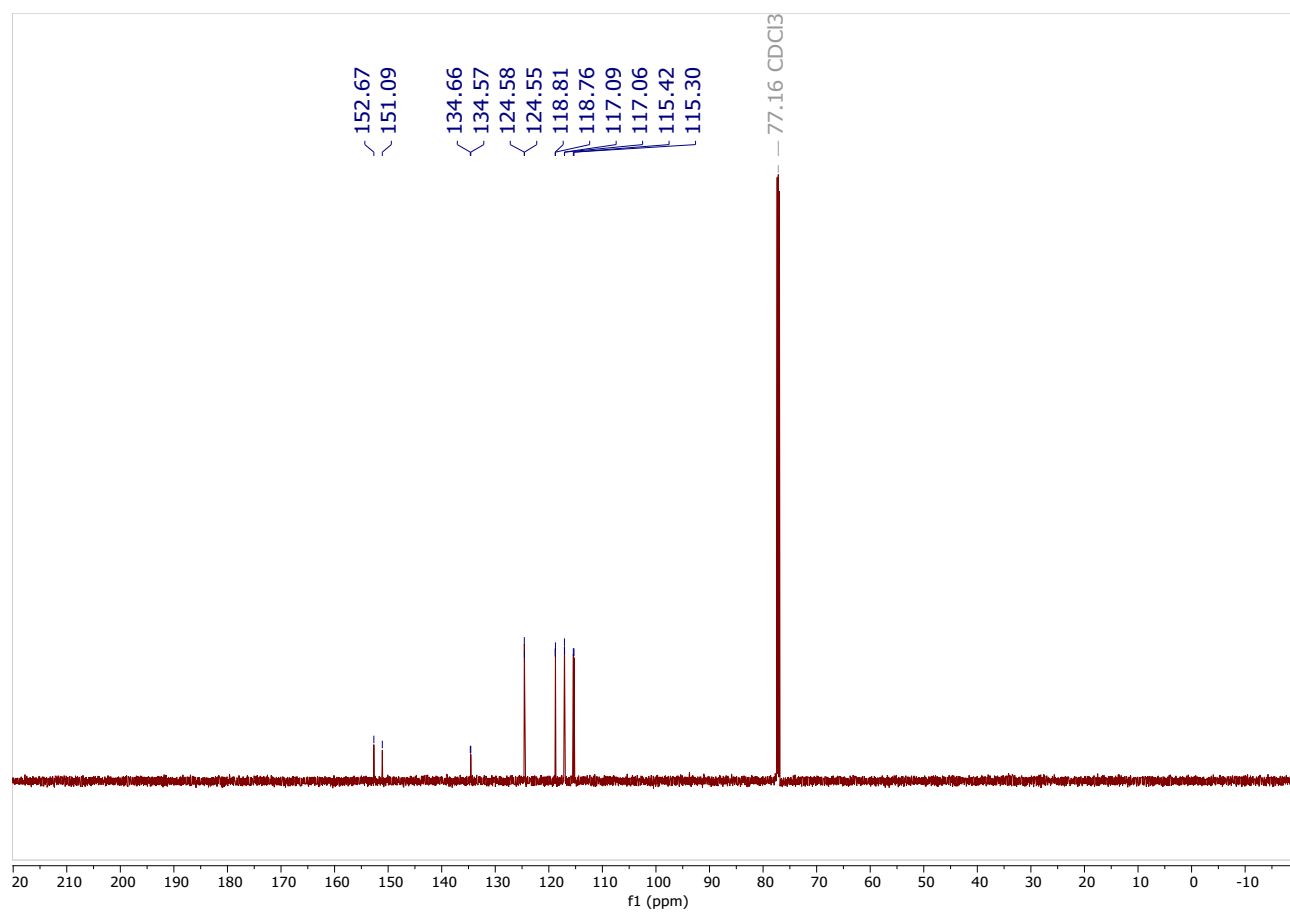

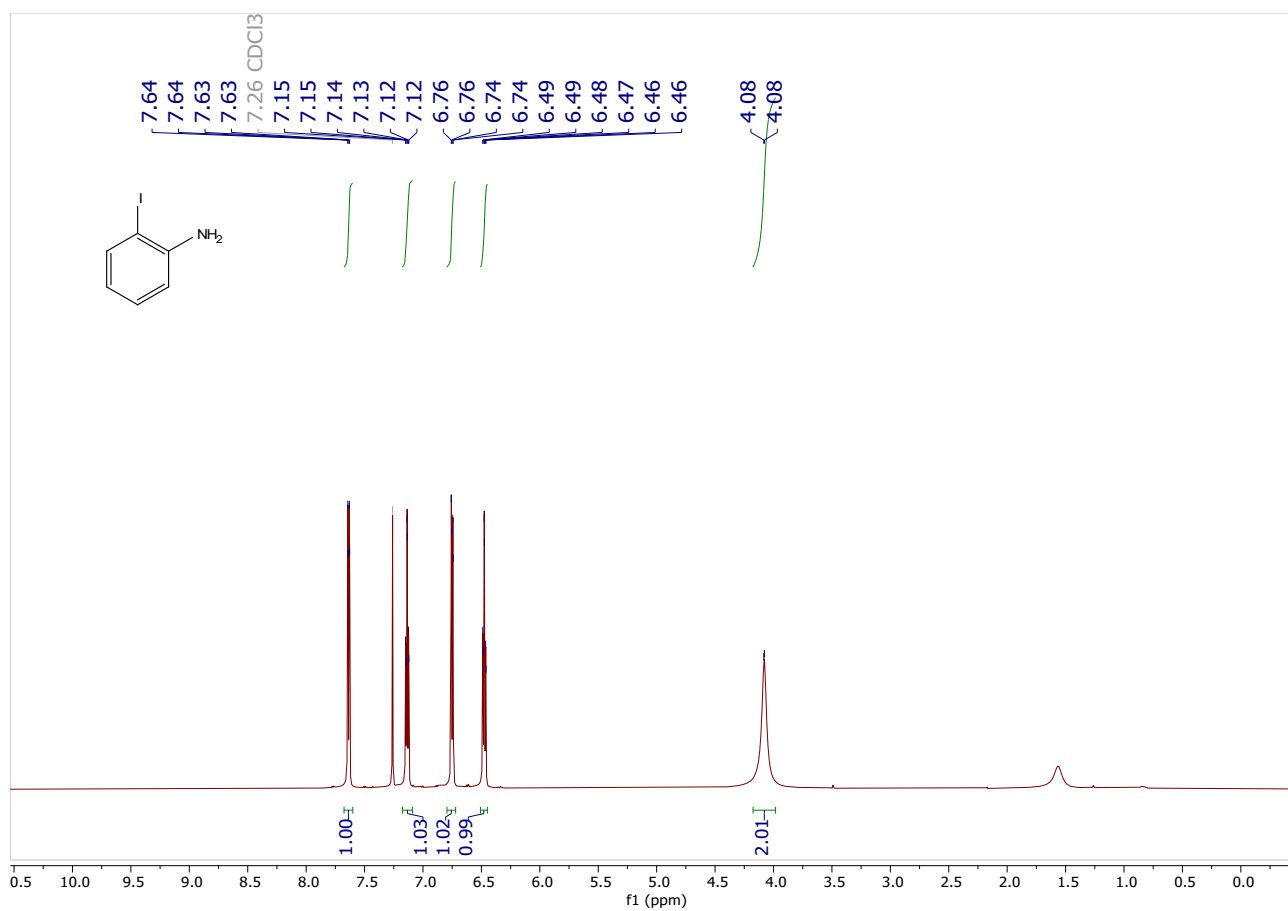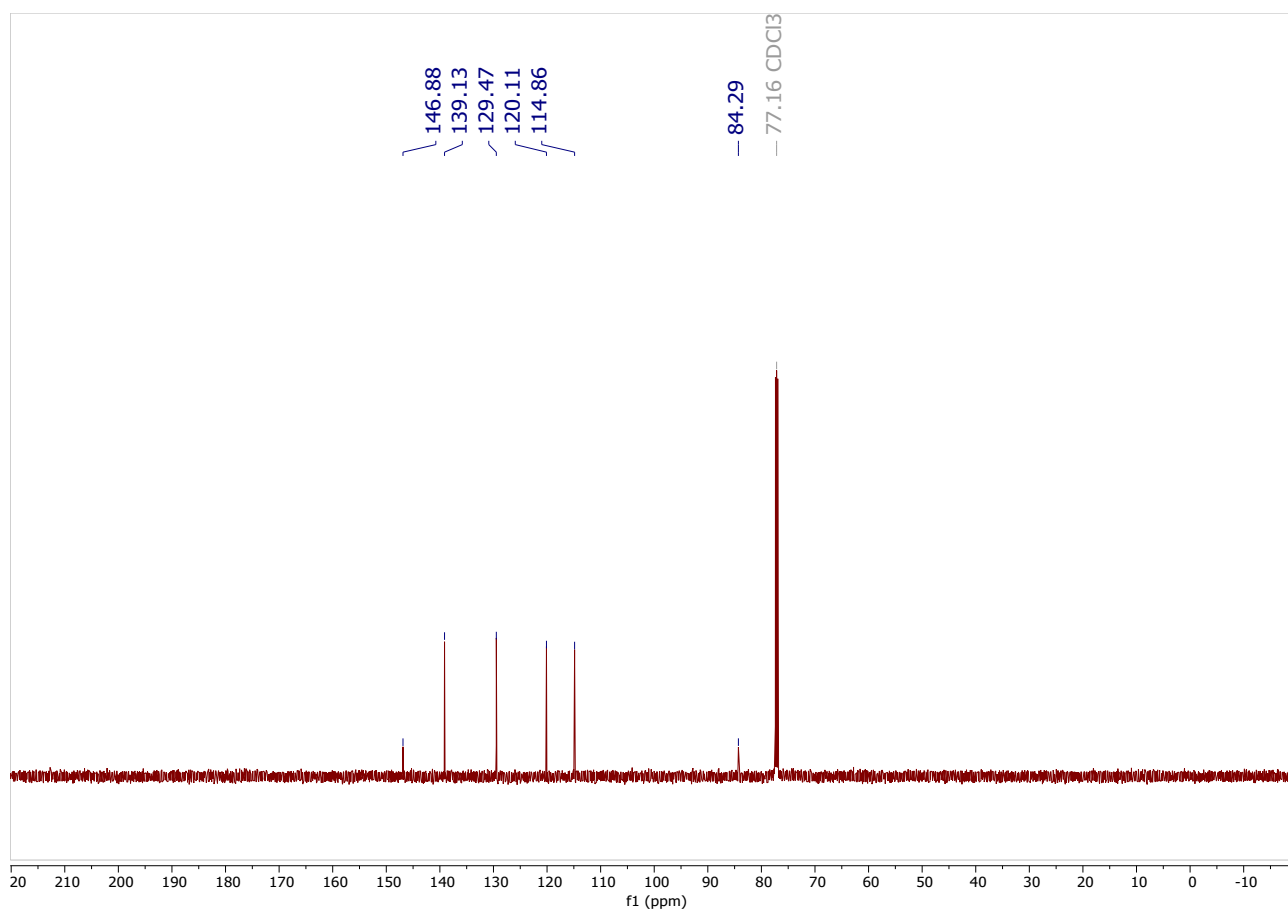

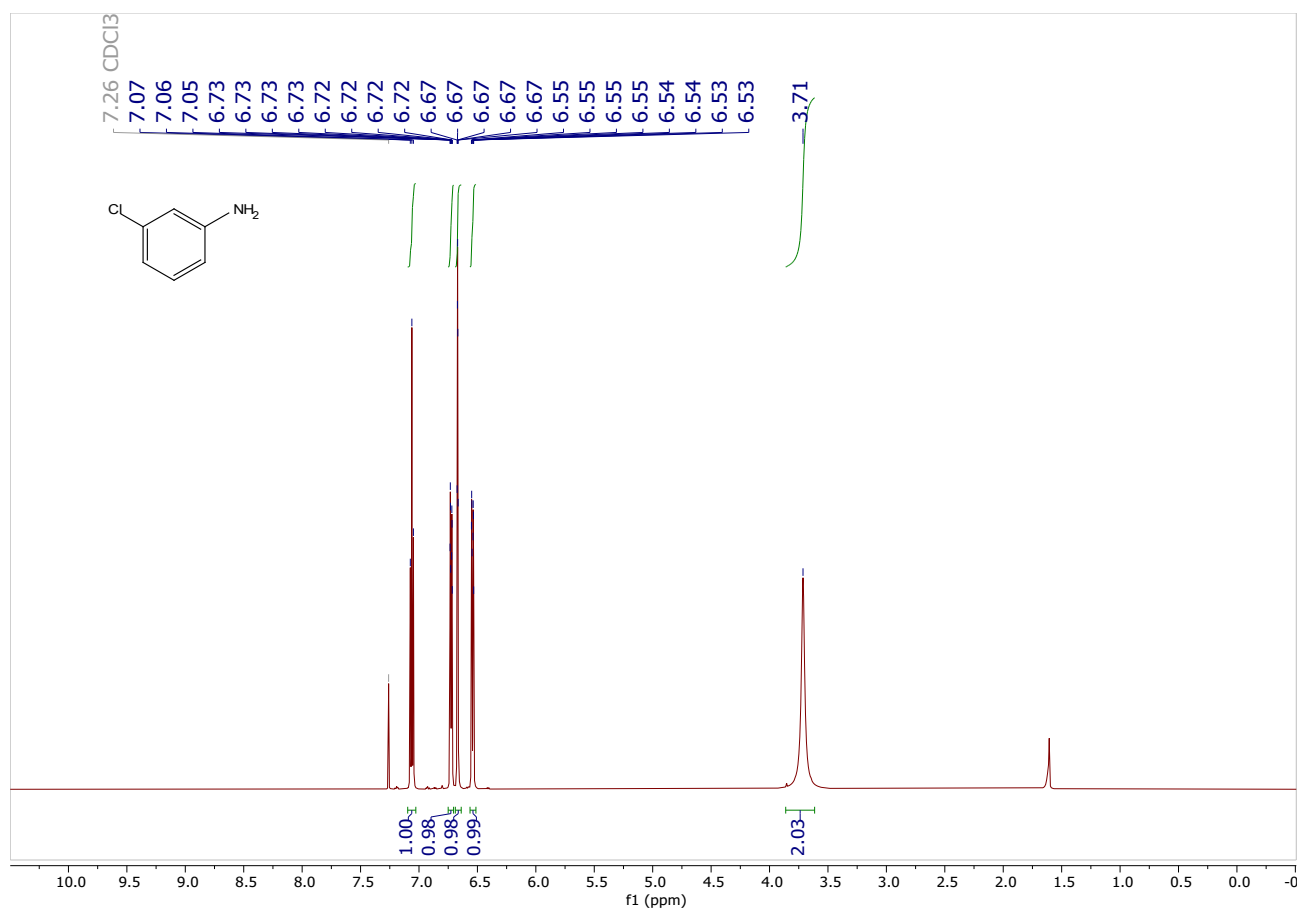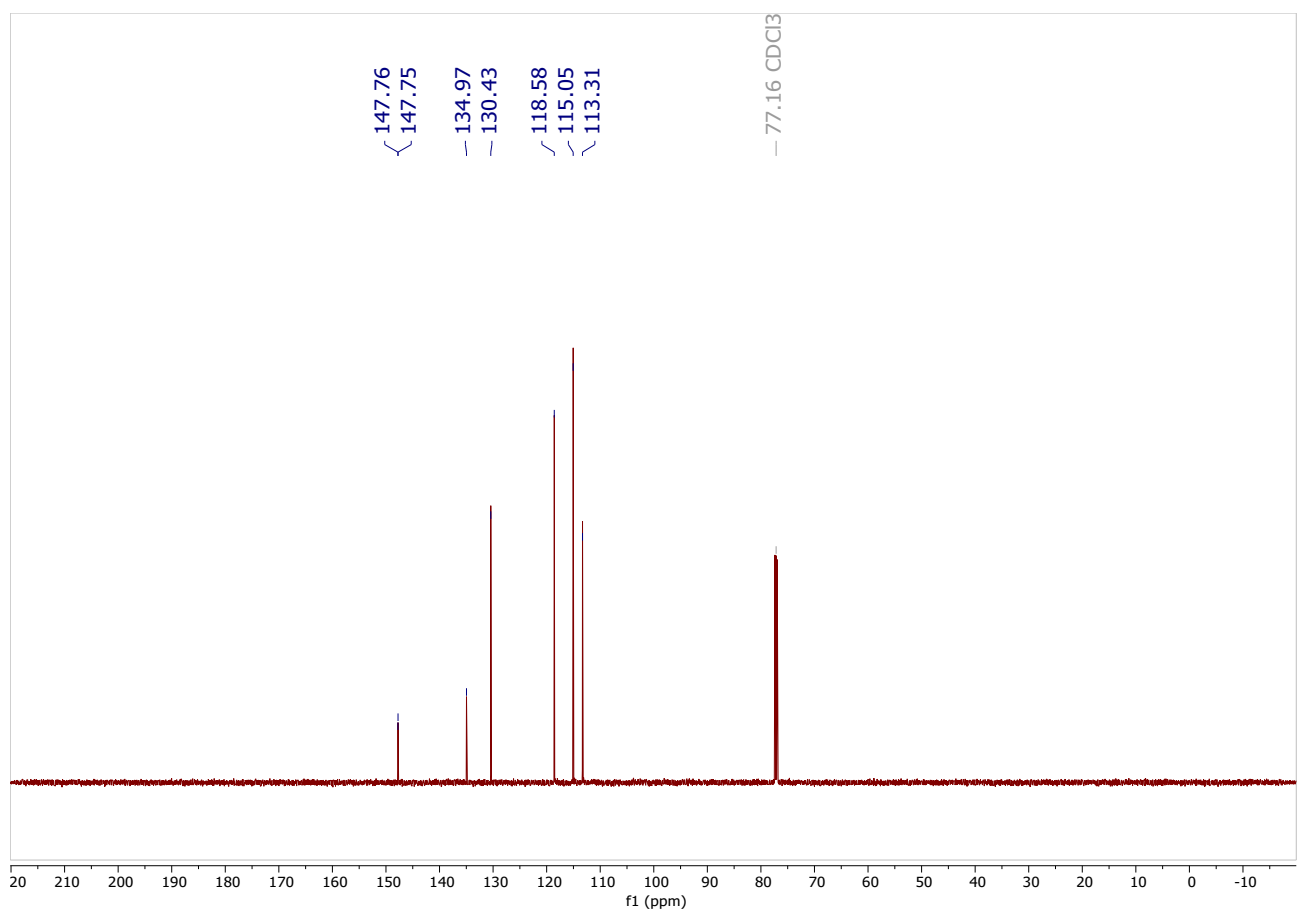

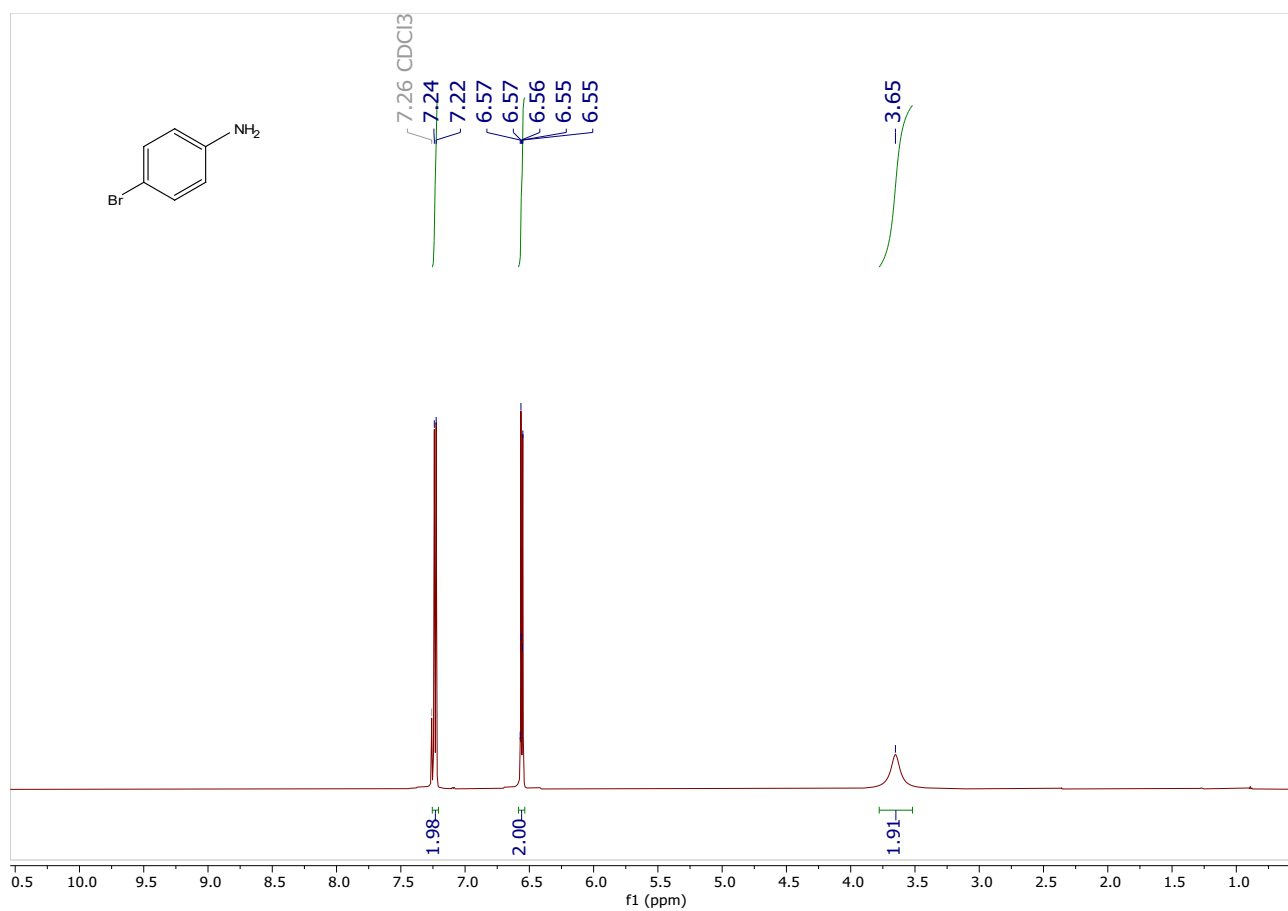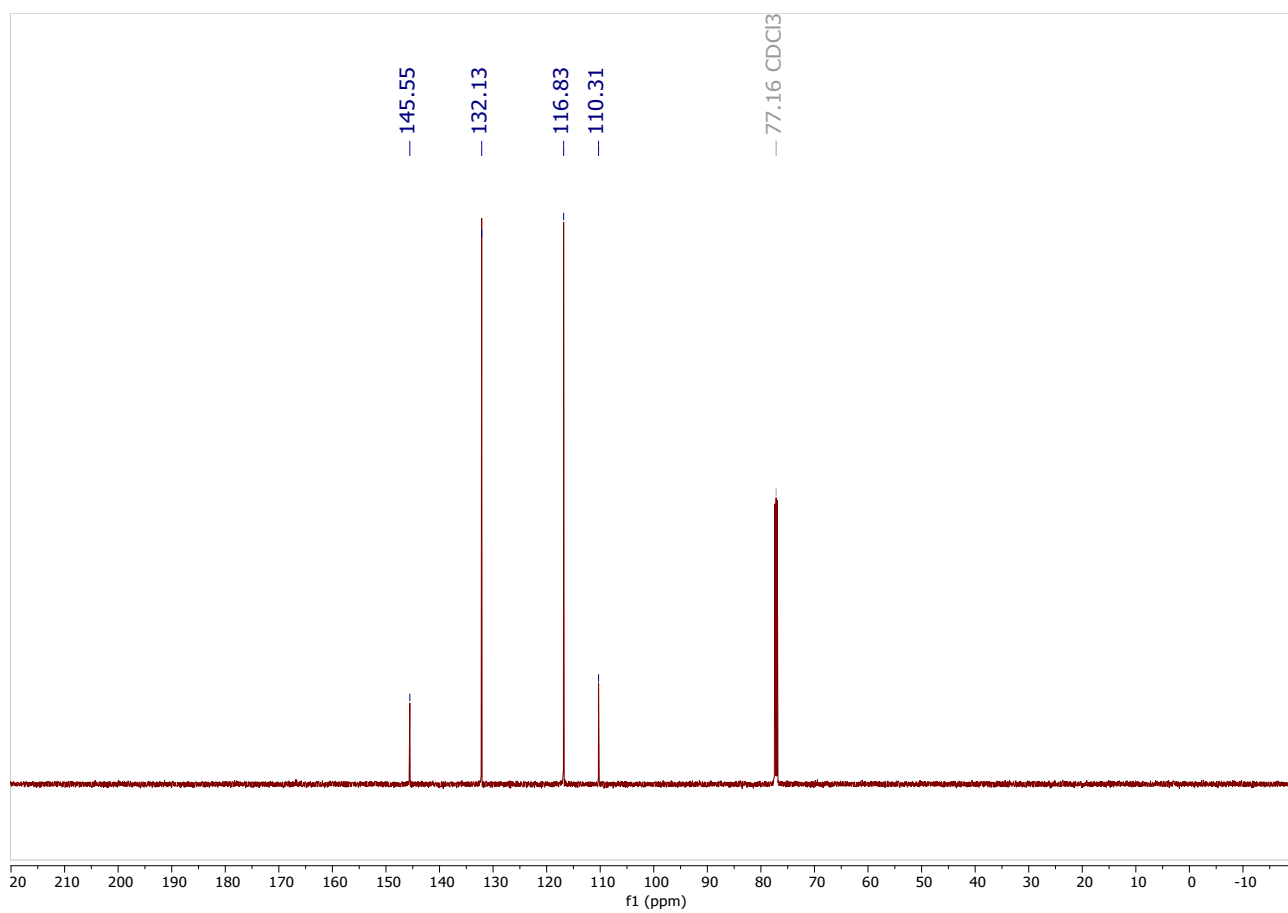



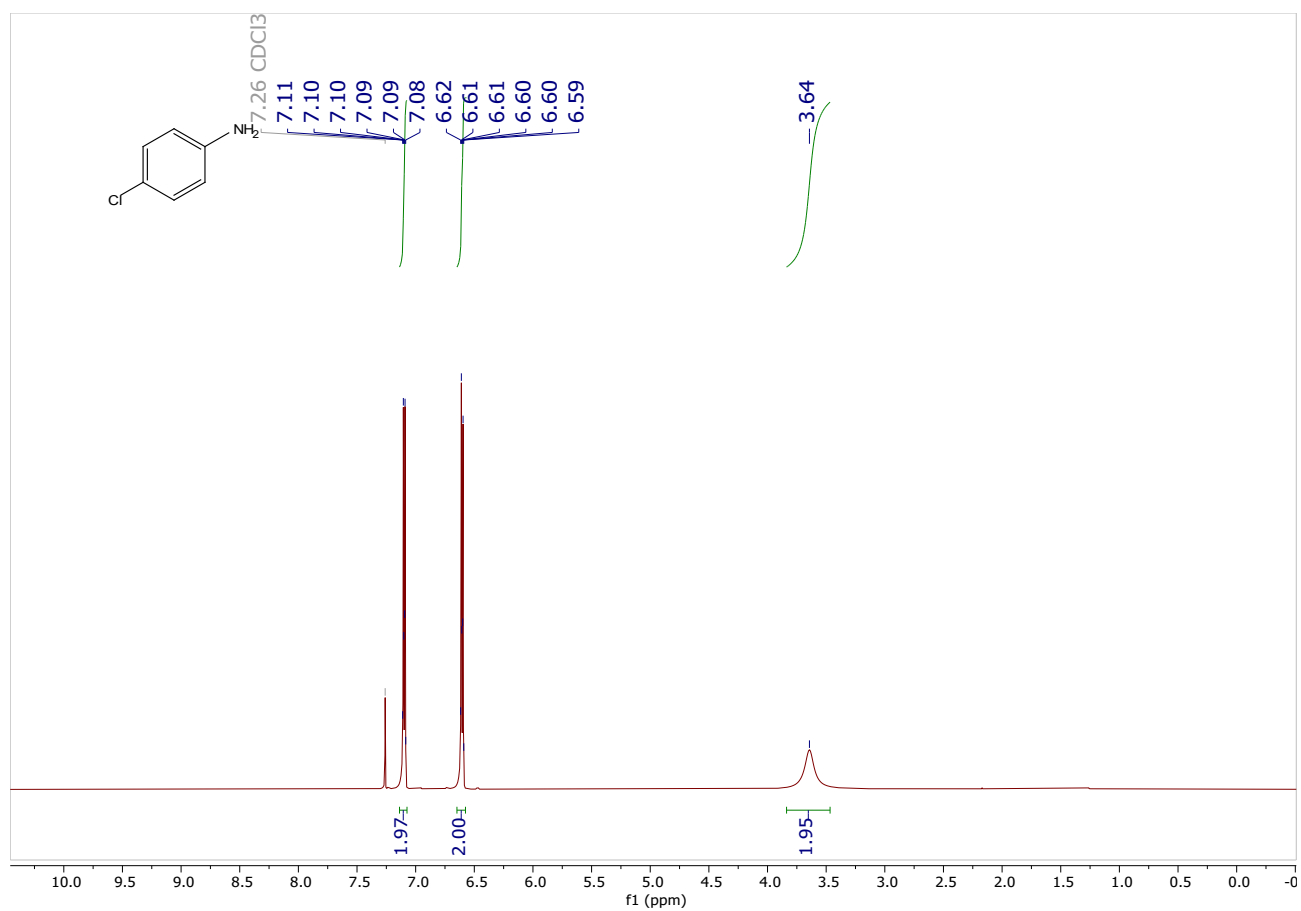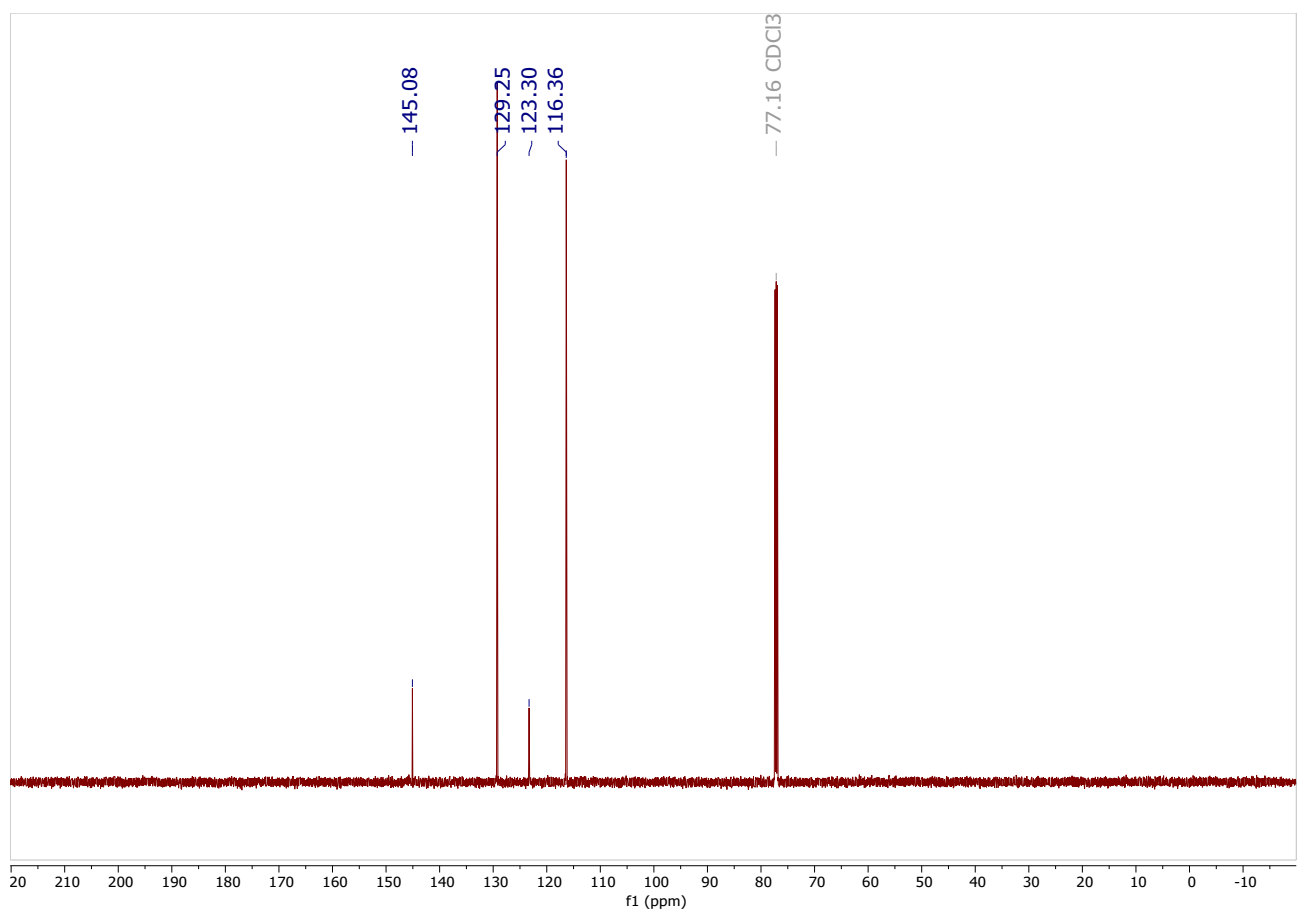

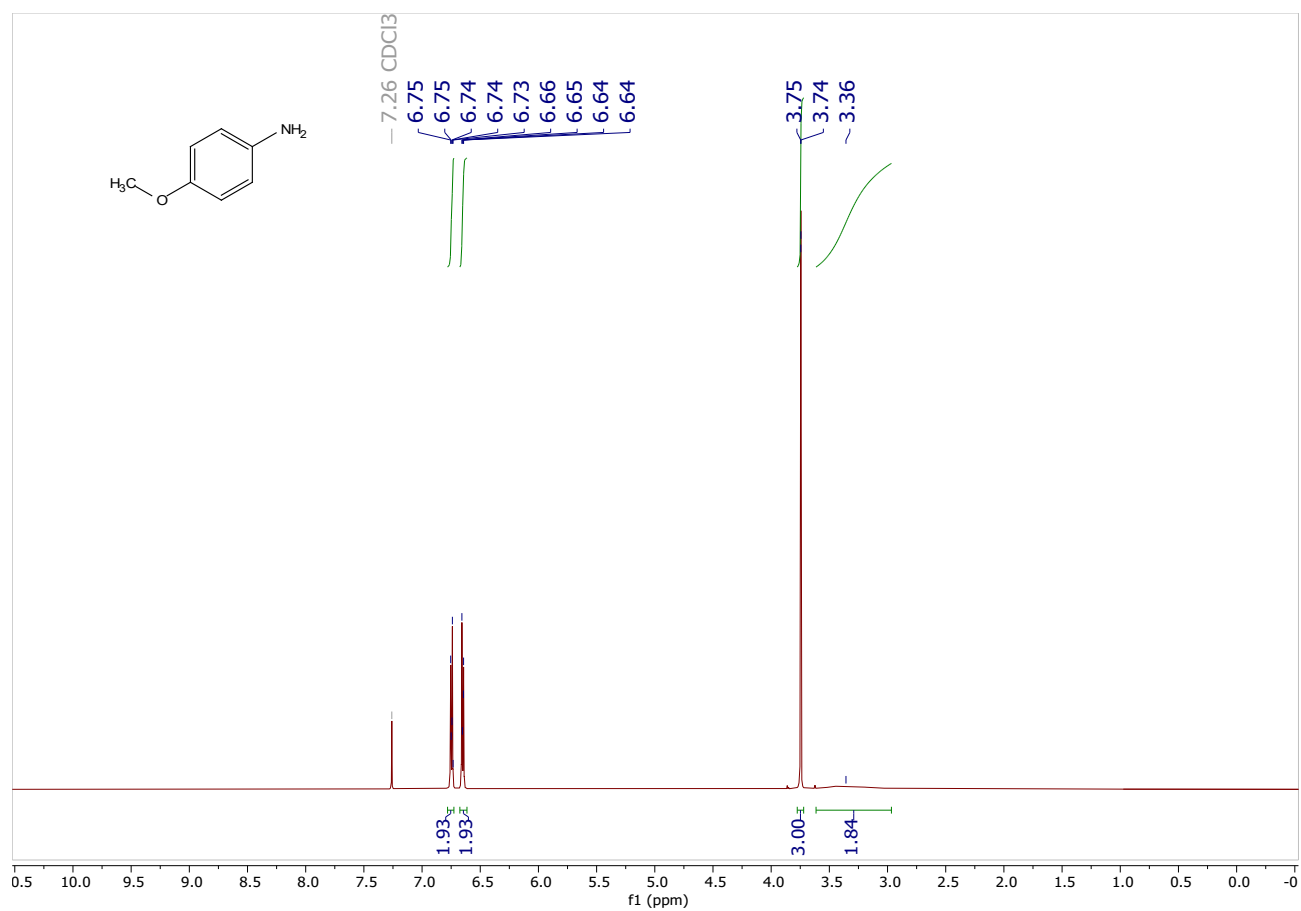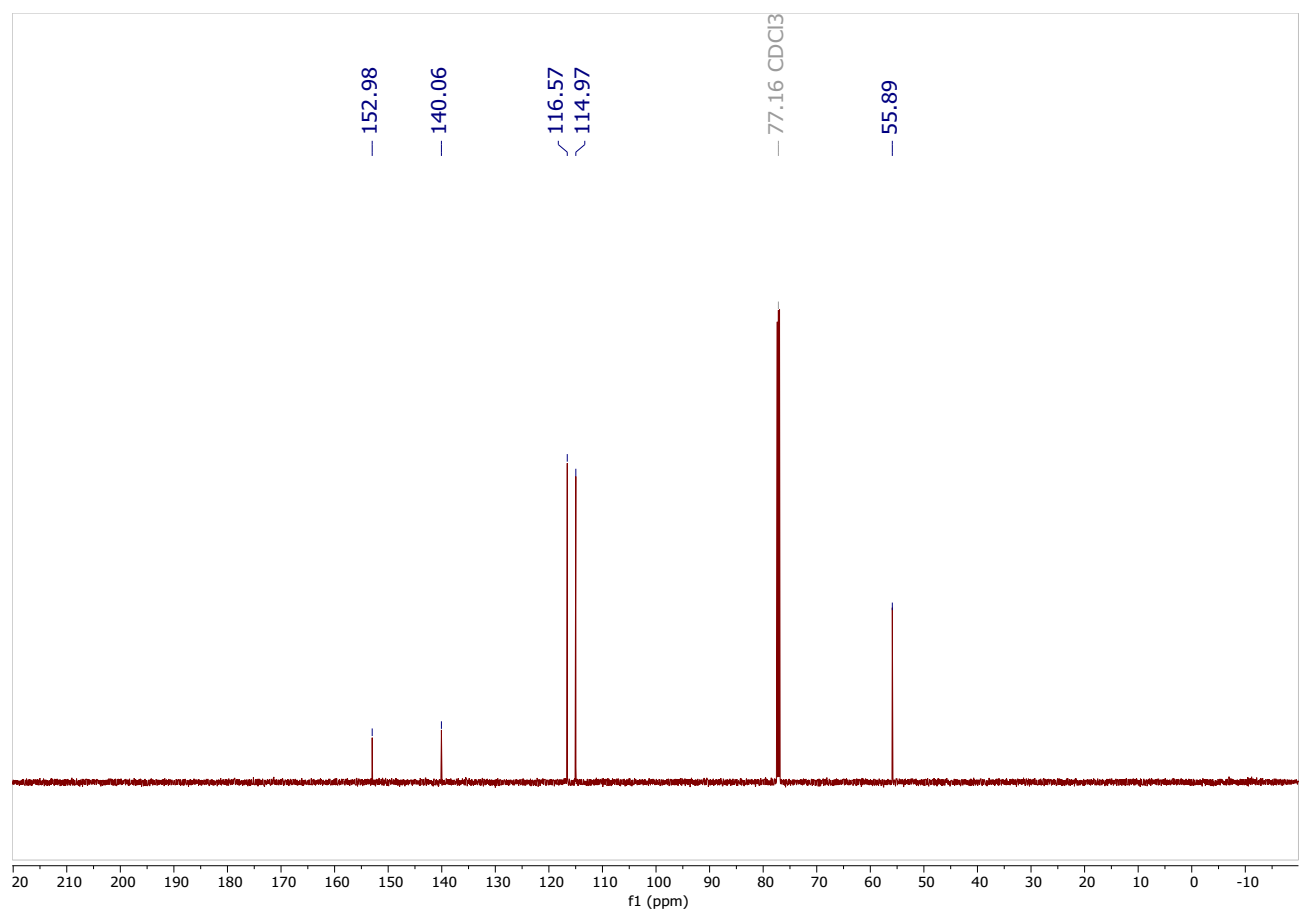

Supplement: d3gc03783e1.pdf [file d3gc03783e1.pdf]
